# Supplementary material for: Exploring the Relationships Between Yield and Yield-Related Traits for Rice Varieties Released in China From 1978 to 2017
Source: Front Plant Sci. 2019 May 7;10:543. doi: 10.3389/fpls.2019.00543 (PMC6514245; doi:10.3389/fpls.2019.00543)
Supplement: Supplementary file 4 [file Data_Sheet_1.csv]

Supplementary Data Sheet 1 Trait values for the 7686 rice varieties studied.
Varieties	Ecotype	Province of release	Year of release	Yield (t/ha)	Growth period (d)	Height (cm)	Pannicle length (cm)	Panicle number (million/ha)	Seed setting rate (%)	1000-grain-weight (g)	Grains per panicle	Seed length/width ratio	Filled grain number
shan you 2 hao	Indica hybrid	Guangdong	1978	6	141.5	92.1	NA	2.7975	81.4	28.05	131.9	NA	107.3666
qing dong ai	Indica inbred	Guangdong	1978	6	125	93	NA	NA	NA	26.5	NA	NA	NA
hong mei zao	Indica inbred	Guangdong	1978	5.25	115	90	NA	3.375	92.5	28.5	87.5	NA	80.9375
dong bai ai	Indica inbred	Guangdong	1978	6	144	90	NA	NA	80	23	100	NA	80
he jiang 19 hao	Japonica inbred	Heilongjiang	1978	6.4425	NA	85	14	NA	NA	26.5	NA	NA	NA
ke jie xuan 17	Indica inbred	Guangdong	1978	6	167.5	95	NA	NA	90	31	95	NA	85.5
zao guang 2 hao	Indica inbred	Guangdong	1978	4.5	130	100	NA	NA	91.7	24	77.1	NA	70.7
guang jiu 6 hao	Indica inbred	Guangdong	1978	6.75	124	92.5	NA	NA	80	25	118	NA	94.4
min ke zhan	Indica inbred	Guangdong	1978	5.25	120	92.5	NA	3.375	87.5	19.5	NA	NA	NA
tie da nuo	Indica inbred	Guangdong	1978	6	130	87.5	NA	3	90	28.5	87.5	NA	78.75
zhai ye qing 8 hao	Indica inbred	Guangdong	1978	5.25	125	90	NA	NA	86	25.5	NA	NA	NA
nan zao 33 hao	Indica inbred	Guangdong	1978	5.967	112	81.5	20	3.45	90.97	26	67.5	NA	61.40475
ke jie xuan 2 hao	Indica inbred	Guangdong	1978	5.25	110	82.5	18.4	NA	87.4	28.2	44.5	NA	38.893
xin qing ai	Indica inbred	Guangdong	1978	6	135	83.5	NA	4.6875	90	23.8	70	NA	63
qiu dong ai	Indica inbred	Guangdong	1978	6	150	95	NA	NA	90	23.5	85	NA	76.5
feng feng zhan	Indica inbred	Guangdong	1978	3.75	127.5	80	NA	4.5	87.5	19.5	65	NA	56.875
mu xin xuan	Indica inbred	Guangdong	1978	3.75	115	75	NA	NA	90	20	80	NA	72
qiu bai zao 3 hao	Indica inbred	Guangdong	1978	4.5	135	87.5	NA	3.375	90	25	NA	NA	NA
xin tie da	Indica inbred	Guangdong	1978	6.75	132.5	87.5	NA	3.225	93	26.9	100	NA	93
tai zhen 92 hao	Indica inbred	Guangdong	1978	6	142	89.7	20.7	3.75	80	25	85.3	NA	68.24
xiezuo69	Indica inbred	Guangdong	1978	6	138.5	95	NA	NA	85	29	NA	NA	86.5
ke guang 10 hao	Indica inbred	Guangdong	1978	6	135	92.5	19.97	3.75	80	25.5	80	NA	64
gui c hao 2 hao	Indica inbred	Guangdong	1978	6.34125	130	100	NA	NA	NA	NA	NA	NA	80
guang dong 104	Indica inbred	Guangdong	1978	6.3795	NA	90	19	NA	NA	24.1	80	NA	NA
ning jing 3 hao	Japonica inbred	Ningxia	1979	11.9025	NA	80	12.5	NA	NA	24	NA	NA	NA
ning jing 4 hao	Japonica inbred	Ningxia	1979	9.9825	NA	NA	NA	NA	NA	NA	NA	NA	NA
shan you ke 30	Indica hybrid	Guangdong	1982	8.1495	124	NA	NA	NA	72	26	146.5	NA	105.48
gang hua dong bai	Indica hybrid	Guangdong	1982	4.84575	NA	NA	NA	NA	NA	NA	NA	NA	NA
guang dong shi	Indica inbred	Guangdong	1982	6.2505	132	90	NA	NA	NA	NA	NA	NA	NA
jin li xin si zhan	Indica inbred	Guangdong	1982	4.86375	132	81	18.1	3.915	88.9	16.7	81.8	NA	72.7202
gui yang ai 121	Indica inbred	Guangdong	1982	5.31825	NA	95	NA	NA	NA	NA	NA	NA	NA
mei hong zao 5 hao	Indica inbred	Guangdong	1982	5.3655	110	73	NA	NA	82	NA	78	NA	63.96
nan ke zao	Indica inbred	Guangdong	1982	6.045	127.5	87.5	19.5	3.96	80.6	24.6	85.4	NA	68.8324
shan you 36	Indica hybrid	Guangxi	1983	7.5	117.5	100	NA	NA	80	27.1	NA	NA	NA
wei you hong tian gu	Indica hybrid	Fujian	1983	6.75	134	91.5	NA	NA	82.5	26.5	NA	NA	NA
wei you 30	Indica hybrid	Fujian	1983	6.75	147.5	100	NA	NA	72.5	27.5	NA	NA	NA
wei you 3 hao	Indica hybrid	Fujian	1983	7.5	NA	NA	22	NA	86	30	NA	NA	NA
bai you 6 hao	Indica hybrid	Fujian	1983	6.375	158	85	NA	NA	90	25	NA	NA	NA
shan you 30xuan	Indica hybrid	Guangxi	1983	7.5	113.5	110	23.5	NA	82.5	26.5	NA	NA	115
shan you 2 hao	Indica hybrid	Fujian	1983	6.75	125	95	NA	NA	88	26.5	NA	NA	NA
wei you 6 hao	Indica hybrid	Fujian	1983	7.5	145	83.5	21.5	NA	86	27	NA	NA	NA
shan you 6 hao	Indica hybrid	Fujian	1983	7.5	146	87.5	NA	NA	NA	25	NA	NA	NA
chu jing 3 hao	Japonica inbred	Yunnan	1983	7.5	184	97.5	NA	3.975	75	28	NA	NA	NA
guang dong shi	Indica inbred	Guangxi	1983	6	125	100	NA	NA	85	26	NA	NA	NA
7944	Indica inbred	Fujian	1983	5.625	120	82.5	17	NA	77.5	31.5	NA	NA	NA
77-175	Indica inbred	Fujian	1983	6.75	131	78.5	NA	NA	86.8	24.5	NA	NA	NA
hong yun 33	Indica inbred	Fujian	1983	5.25	105	75	NA	NA	77.5	33	NA	NA	NA
233	Indica inbred	Fujian	1983	6	120	77.5	NA	NA	80	25	NA	NA	NA
shui fu 17 hao	Indica inbred	Guangxi	1983	6	138	80	NA	NA	82	22.5	NA	NA	NA
guang bao	Indica inbred	Fujian	1983	6	162.5	82	NA	NA	90	21.75	NA	NA	NA
ke fu hong 2 hao	Indica inbred	Fujian	1983	6	119.5	82.5	20	NA	77.5	31	NA	NA	NA
71-20	Indica inbred	Fujian	1983	5.25	113	75	16.5	NA	NA	22.5	NA	NA	NA
zhu guang 29	Indica inbred	Anhui	1983	6	110	75	NA	NA	80	27	NA	NA	NA
jin nan wan	Indica inbred	Fujian	1983	6	155	91.5	NA	NA	86.3	24.1	NA	NA	NA
hong yang ai 4 hao	Indica inbred	Guangdong	1983	6.018	127.5	85	NA	3.3	85	25	NA	NA	NA
jing guo 92	Japonica inbred	Yunnan	1983	7.5	127.5	100	18	NA	NA	24.5	NA	NA	92.5
han feng	Japonica inbred	Shanghai	1983	5.115	NA	70	16	4.5	84.7	25	67.5	NA	57.1725
dian yu 1 hao	Japonica inbred	Yunnan	1983	9	185	85	14.5	NA	90	23.5	NA	NA	80
yan jing 2 hao	Japonica inbred	Jiangsu	1983	7.5	147.5	85	NA	NA	90	24.5	NA	NA	NA
gui fu 3 hao	Indica inbred	Fujian	1983	4.5	NA	NA	NA	NA	NA	25.5	NA	NA	NA
he jiang 21 hao	Japonica inbred	Heilongjiang	1983	7.0905	NA	85	13.5	NA	NA	27.5	NA	NA	NA
05zhan	Indica inbred	Guangxi	1983	4.5	120	97.5	20	NA	92.5	16.5	NA	NA	NA
hui you zhan	Indica inbred	Guangdong	1983	3.5595	130	95	NA	3.435	84.8	16.5	77	NA	65.296
yun jing 136	Japonica inbred	Yunnan	1983	7.5	180	105	NA	NA	73.5	29	NA	NA	140
chu xian1 hao	Indica inbred	Yunnan	1983	7.5	160.5	90	NA	NA	NA	28	NA	NA	NA
gang bai ai 1 hao	Indica inbred	Guangdong	1983	4.4415	142	93	18	3.6	78.5	22	95	NA	74.575
ning jing 5 hao	Japonica inbred	Ningxia	1983	7.66425	140	80	NA	NA	NA	NA	NA	NA	NA
min hua zhan	Indica inbred	Guangdong	1983	3.9945	130	95	NA	NA	NA	15.5	NA	NA	NA
jin dao 1 hao	Japonica inbred	Shanxi	1983	9.75	157.5	110	19	NA	NA	27.5	NA	NA	NA
jiu dao 6 hao	Japonica inbred	Jilin	1983	6.75	134	NA	NA	NA	90	26.5	NA	NA	NA
hei jing 3 hao	Japonica inbred	Heilongjiang	1983	5.25	NA	75	NA	NA	NA	27	NA	NA	NA
dian hua 2 hao	Japonica inbred	Yunnan	1983	6.75	184	97.5	17.4	3.975	75	28	NA	NA	NA
shuang gui 1 hao	Indica inbred	Guangdong	1983	5.4465	145	NA	NA	NA	NA	NA	NA	NA	NA
guang dong 104	Indica inbred	Guangxi	1983	6	126.5	97.5	21	NA	82.5	25.6	NA	NA	NA
shuang gui 1 hao	Indica inbred	Guangxi	1983	5.25	140	90	NA	NA	80	24.5	NA	NA	NA
shan you 36	Indica hybrid	Guangdong	1984	6.9	127.5	96.2	22.6	2.85	80.8	26.2	117.2	NA	94.6976
qing hua ai 6 hao	Indica inbred	Guangdong	1984	5.295	140	93	19	3.45	87.2	21.1	94	NA	81.968
ning jing 6 hao	Japonica inbred	Ningxia	1984	9.75	142.5	74	11.5	NA	NA	23	70	NA	58
qiu guang	Japonica inbred	Ningxia	1984	9.75	139	82.5	13	NA	NA	24.5	60	NA	NA
yu chi 231-8	Indica inbred	Hunan	1984	6	121	85	22	NA	NA	22.23	NA	NA	NA
xiu you 57	Japonica hybrid	Ningxia	1984	11.25	160	NA	19	NA	NA	25.5	105	NA	82.5
dong wan 5 hao	Japonica inbred	Ministry of Agriculture and Rural Affairs of the People¡®s Republic of China	1985	6	NA	NA	NA	NA	NA	NA	NA	NA	NA
dong yi 105	Japonica inbred	Ministry of Agriculture and Rural Affairs of the People¡®s Republic of China	1985	6	154	88	NA	NA	NA	26	NA	NA	NA
shuang dong zhan	Indica inbred	Guangdong	1985	5.1135	135	85	19.9	3.195	86.7	22.5	83.5	NA	72.3945
qian xuan 74-4	Japonica inbred	Shanghai	1985	6.375	162.5	87.5	16	NA	87.5	26	NA	NA	NA
chu jing 4 hao	Japonica inbred	Yunnan	1985	8.25	164	95	NA	NA	NA	25	NA	NA	NA
yun yu 1 hao	Japonica inbred	Yunnan	1985	7.91175	185	NA	NA	NA	NA	25	150	NA	100
cong gui 314	Indica inbred	Guangdong	1985	6.7425	133	98	19.5	3.195	84.1	25.7	107	NA	89.987
4-425	Japonica inbred	Yunnan	1985	7.5	166.5	87.5	18.25	NA	NA	26	NA	NA	NA
xiang zao xian1 hao	Indica inbred	Hunan	1985	6.75	121	NA	NA	NA	NA	31	NA	NA	NA
shan you 64	Indica hybrid	Guangdong	1986	6.7785	125	97.5	21.9	2.79	85.9	27.3	108.6	NA	93.2874
qi gui zao 25	Indica inbred	Guangdong	1986	5.2605	126.5	90	20	3	90	18.5	90	NA	81
san dong ai	Indica inbred	Guangdong	1986	6.2745	133	92.5	20.3	3.675	82.1	22.5	100.3	NA	82.3463
dian long 201	Indica inbred	Yunnan	1986	6	NA	112.5	24	NA	80	33	NA	3.2	NA
shuang gui 36	Indica inbred	Guangdong	1986	6.2205	137.5	87.5	19.7	3.855	83.5	23.8	87.3	NA	72.8955
ai mei zao 3 hao	Indica inbred	Guangdong	1986	5.817	125	82	17.5	3.75	84.7	26.3	78	NA	66.066
huai zao 1 hao	Indica inbred	Hunan	1986	6.3	114	77.5	NA	NA	NA	25.5	NA	NA	NA
chu jing 5 hao	Japonica inbred	Yunnan	1986	8.628	171	96.5	NA	NA	84	25.5	103	NA	86.52
ning jing 7 hao	Japonica inbred	Ningxia	1986	9.6945	150	85	NA	NA	NA	25.5	NA	NA	NA
qiu gui ai 11 hao	Indica inbred	Guangdong	1986	6.4905	138	95	20.3	2.955	84	25.1	99.3	NA	83.412
ning jing 8 hao	Japonica inbred	Ningxia	1986	8.25	127.5	77	NA	NA	NA	26	NA	NA	45
qing you fu gui	Indica inbred	Guangdong	1986	7.4295	135	92.4	18	2.955	80	26	130	NA	104
huai zao 2 hao	Indica inbred	Hunan	1986	6	112	80	NA	4.485	NA	27.7	NA	NA	60.2
wan hua ai 1 hao	Indica inbred	Guangdong	1986	6.2625	136	90	20	3.075	85	23.4	108	NA	91.8
shan you zhi long	Indica hybrid	Guangdong	1987	6.7575	130	100	20.8	2.25	83.6	28.2	138.9	NA	116.1204
shan you 63	Indica hybrid	Hunan	1987	8.25	NA	NA	NA	NA	NA	NA	NA	NA	NA
xiu shui 04	Japonica inbred	Shanghai	1987	6.9555	156	95	16	NA	85	26.5	NA	NA	NA
jin jing 3 hao	Japonica inbred	Tianjin	1987	7.5	135	108	17.5	NA	NA	26.5	NA	NA	85
hong qi 23	Japonica inbred	Tianjin	1987	3.44325	167.5	105	19.5	NA	NA	24.5	NA	NA	NA
qiu guang	Japonica inbred	Jilin	1987	7.5	147.5	90	NA	NA	NA	25	NA	NA	NA
dong yi 105	Japonica inbred	Hunan	1987	5.25675	125	89	16.4	NA	NA	27	NA	NA	NA
zao jin	Japonica inbred	Jilin	1987	7	142	NA	NA	NA	NA	26	NA	NA	NA
ji jing 62 hao	Japonica inbred	Jilin	1987	7.7468	138	95	NA	NA	NA	25	NA	NA	NA
mei lian zao	Indica inbred	Guangdong	1987	5.067	107	77.5	18.2	3.45	82.65	24	86.3	NA	71.32695
xiang zao xian4 hao	Indica inbred	Hunan	1987	6.2325	108.5	77.5	NA	NA	NA	26.8	NA	NA	NA
shuang cong 169-1	Indica inbred	Guangdong	1987	6.4725	127	97.5	18	3.45	84.45	25	97.5	NA	82.33875
han 9	Japonica inbred	Jilin	1987	4.3093	125	92.7	19	NA	NA	NA	NA	NA	NA
yun jing 219	Japonica inbred	Yunnan	1987	7.59	178	105	18	NA	NA	29	NA	NA	97
04-1267	Japonica inbred	Yunnan	1987	8.19	170	95	NA	NA	NA	25.5	NA	NA	NA
yun dong tian 02	Japonica inbred	Yunnan	1987	7.4115	165	95	NA	NA	NA	26.5	NA	NA	NA
jin dao 1187	Japonica inbred	Tianjin	1987	7.5	167.5	105.5	17	NA	NA	26.5	NA	NA	NA
shan you 85	Indica hybrid	Zhejiang	1988	6.76425	NA	NA	NA	NA	NA	NA	NA	NA	NA
te qing 2 hao	Indica inbred	Guangdong	1988	5.802	140	97.5	19	2.805	77.9	25	NA	NA	118.6
ning jing 9 hao	Japonica inbred	Ningxia	1988	11.4984	150	87.5	NA	NA	NA	26	NA	NA	NA
ai qing 32	Indica inbred	Shanghai	1988	5.6325	110	NA	NA	NA	NA	NA	NA	NA	NA
chu jing 2 hao	Japonica inbred	Yunnan	1988	7.5	166.5	87.5	18.25	NA	NA	26	NA	NA	NA
wu xiang jing 1 hao	Japonica inbred	Shanghai	1988	6.9555	150	100	17	NA	NA	27	NA	NA	NA
guang ke 36 hao	Indica inbred	Guangdong	1988	6.321	123	96.5	18.4	3.285	86.6	27.3	NA	NA	NA
ning jing 10 hao	Japonica inbred	Ningxia	1988	9.59175	136	77.5	12	NA	NA	25	NA	NA	NA
liao jing 287	Japonica inbred	Liaoning	1988	7.54425	160	92.5	NA	NA	NA	NA	NA	NA	NA
gui shan ai	Indica inbred	Guangdong	1988	5.57625	136	102.5	18	3.45	84.6	21.4	90.9	NA	76.9014
hu jing kang	Japonica inbred	Shanghai	1988	7.908	156	105	15	NA	85	26	90	NA	76.5
jiu dao 9 hao	Japonica inbred	Jilin	1988	7.2424	137	105	NA	NA	90	27	NA	NA	NA
yan jing 15 hao	Japonica inbred	Jilin	1988	5.3625	115	70	14	NA	90	25	NA	1.45	NA
yan jing 14 hao	Japonica inbred	Jilin	1988	6.45	120	80	13	NA	90	27.5	NA	1.76	NA
zhong xi 8215	Japonica inbred	Tianjin	1989	7.305	165	102.5	17.5	NA	NA	25.5	NA	NA	NA
zhongzuo321	Japonica inbred	Tianjin	1989	7.1115	166	96	17.5	NA	NA	25.5	NA	NA	NA
zhong hua 11 hao	Japonica inbred	Tianjin	1989	7.086	160	112.5	20	NA	NA	NA	NA	NA	NA
zhong xi 8121	Japonica inbred	Tianjin	1989	7.0035	165	102.5	17.5	NA	NA	25.5	NA	NA	NA
xing shi	Japonica inbred	Beijing	1989	7.5	165	110	19	NA	95	25.5	NA	NA	NA
han you xiang qing	Japonica hybrid	Shanghai	1989	8.2185	160	105	NA	2.775	NA	25	NA	NA	NA
dong nong 415	Japonica inbred	Heilongjiang	1989	7.215	NA	87	16.5	NA	NA	26.5	NA	NA	NA
hua pei 528	Japonica inbred	Shanghai	1989	6.4275	125	82.5	19	2.85	85	27.5	90	NA	76.5
ji jing 63 hao	Japonica inbred	Jilin	1989	7.5315	138	95	NA	NA	95	29.5	NA	NA	NA
he 16	Japonica inbred	Yunnan	1989	7.5	161.5	95	NA	NA	85.45	30.5	NA	NA	NA
xiang zao xian9 hao	Indica inbred	Hunan	1989	6.9285	108	80	NA	4.35	90	23	NA	NA	NA
yan jing 16 hao	Japonica inbred	Jilin	1989	6.2288	128	90	NA	NA	90	25	NA	NA	NA
mu dan jiang 19 hao	Japonica inbred	Heilongjiang	1989	7.1715	NA	92	17.45	NA	NA	27	NA	NA	NA
175xuan 3	Japonica inbred	Yunnan	1989	7.58805	185	111	21	NA	NA	28.4	NA	NA	NA
feng you 6 hao	Japonica hybrid	Shandong	1989	9	167.5	95	19	NA	80.5	NA	120	NA	96.6
zhong bai 4 hao	Japonica inbred	Beijing	1989	9	165	107.5	NA	NA	NA	NA	NA	NA	NA
shan you 3550	Indica hybrid	Guangdong	1990	5.73825	127.5	100	21	2.46	82.9	24.5	142.1	NA	117.8009
shan you 63	Indica hybrid	Ministry of Agriculture and Rural Affairs of the People¡®s Republic of China	1990	7.236	NA	105	NA	2.7	80	29	NA	NA	NA
shan you 64	Indica hybrid	Hunan	1990	7.5	129	92.5	22.5	NA	79	27.5	NA	NA	NA
jing dao 3 hao	Japonica inbred	Tianjin	1990	7.074	140	100	15.5	NA	NA	25.5	NA	NA	NA
jin dao 521	Japonica inbred	Tianjin	1990	6.8265	145	97.5	17	NA	NA	28.5	NA	NA	NA
hong xing 16 hao	Japonica inbred	Beijing	1990	6.75	140	NA	NA	NA	NA	NA	NA	NA	NA
qing liu ai 1 hao	Indica inbred	Guangdong	1990	5.83875	136	102	21.4	3.3	75.5	22.2	109.9	NA	82.9745
he xi 4 hao	Japonica inbred	Yunnan	1990	7.5	182.5	105	19	NA	NA	24	NA	NA	NA
shuang c hao 25	Indica inbred	Guangdong	1990	6.2445	136	95	20	3.39	82.4	24.8	100.2	NA	82.5648
ning jing 11 hao	Japonica inbred	Ningxia	1990	11.2125	150	95	15	NA	NA	25	NA	NA	60
xiu you 57	Japonica hybrid	Ministry of Agriculture and Rural Affairs of the People¡®s Republic of China	1990	9	162.5	100	20	NA	80	26.5	NA	NA	NA
xiang jing 832	Japonica inbred	Shanghai	1990	6.75	155	105	NA	NA	90	27.5	100	NA	90
mei san wu 2 hao	Indica inbred	Guangdong	1990	5.586	125	92.5	19.3	3.675	86	22.5	NA	NA	83.8
ning jing 12 hao	Japonica inbred	Ningxia	1990	10.0818	135	80	NA	NA	NA	28	NA	NA	NA
chu jing 8 hao	Japonica inbred	Yunnan	1990	7.6395	166	87.5	NA	NA	82.5	24	NA	NA	NA
long jing 2 hao	Japonica inbred	Heilongjiang	1990	5.5482	NA	83	NA	NA	NA	27	NA	NA	NA
jiu dao 11 hao	Japonica inbred	Jilin	1990	7.5158	140	95	17	NA	90	25	NA	NA	NA
hei jing 5 hao	Japonica inbred	Heilongjiang	1990	4.6665	NA	80	NA	NA	NA	28	NA	NA	NA
ning nuo 3 hao	Japonica inbred	Ningxia	1990	10.38	150	80	16	NA	88.5	NA	NA	NA	NA
han you 1027	Japonica hybrid	Shanghai	1990	8.283	158	100	17	3.225	85	27.5	NA	NA	NA
liao jing 421	Japonica inbred	Liaoning	1990	9	155	100	NA	NA	NA	27.8	NA	NA	NA
chu jing 6 hao	Japonica inbred	Yunnan	1990	7.554	172.5	97.5	NA	NA	NA	25	NA	2	NA
he xi 10 hao	Japonica inbred	Yunnan	1990	8.007	173	100	NA	NA	NA	23.5	NA	NA	NA
he xi 5 hao	Japonica inbred	Yunnan	1990	7.5	182.5	100	18.5	NA	NA	22.5	NA	NA	NA
s hao zao xian1 hao	Indica inbred	Hunan	1990	7.05	115	85	18	NA	83.2	25	NA	NA	NA
jin zhu 1 hao	Japonica inbred	Tianjin	1990	7.158	142.5	95	18	NA	94	25.5	NA	NA	NA
teng xi 138	Japonica inbred	Jilin	1990	8.0633	132	93	NA	NA	95	25	NA	NA	NA
zhen gui ai 1 hao	Indica inbred	Guangdong	1990	6.066	127.5	95	20	3.27	82.9	20.6	NA	NA	NA
guang you qing	Indica hybrid	Guangdong	1991	7.1775	136	103.5	19	2.475	87	25	132	NA	114.84
shan you 64	Indica hybrid	Ministry of Agriculture and Rural Affairs of the People¡®s Republic of China	1991	6.75	113	84	21.25	NA	80	26.5	100	NA	80
xie you 46	Indica hybrid	Ministry of Agriculture and Rural Affairs of the People¡®s Republic of China	1991	6	127.5	92.5	NA	3.45	88.5	28.75	110	NA	97.35
Dyou 63	Indica hybrid	Ministry of Agriculture and Rural Affairs of the People¡®s Republic of China	1991	7.5	147.5	105	25	2.625	89	28	NA	NA	NA
liao yan 2 hao	Japonica inbred	Tianjin	1991	7.2285	147.5	NA	20	4.5	92.5	25.5	NA	NA	NA
qi shan zhan	Indica inbred	Guangdong	1991	5.66325	132.5	92.5	20	3.6	91	18	96	NA	87.36
teng xi 138	Japonica inbred	Heilongjiang	1991	7.2981	NA	88	NA	NA	NA	25	NA	NA	NA
liao kai 79	Japonica inbred	Liaoning	1991	9.027	156	97.5	19	NA	NA	27.5	NA	NA	NA
luhong zao 1 hao	Indica inbred	Ministry of Agriculture and Rural Affairs of the People¡®s Republic of China	1991	6.75	113	75	NA	NA	NA	28.5	NA	NA	NA
wan hua ai 1 hao	Indica inbred	Ministry of Agriculture and Rural Affairs of the People¡®s Republic of China	1991	6	136	95	NA	3.075	85	23.4	NA	NA	NA
tong xi 103	Japonica inbred	Jilin	1991	8.359	136	100	NA	NA	NA	25	NA	NA	NA
xiang zao xian11 hao	Indica inbred	Hunan	1991	7.023	109	80	NA	4.1	NA	28	NA	2.1	NA
he xi 2 hao	Japonica inbred	Yunnan	1991	6.765	167	80	15.5	NA	NA	25	NA	NA	NA
qiu tian 32	Japonica inbred	Jilin	1991	7.5945	140	97	18.2	NA	94	27.5	NA	NA	NA
he xi 22 hao	Japonica inbred	Yunnan	1991	8.715	167.5	105	NA	5.1	90	26	NA	NA	NA
yue gui 146	Indica inbred	Guangdong	1991	6.246	131	95	19.8	3.27	89.4	21.7	104.9	NA	93.7806
yan jing 18 hao	Japonica inbred	Jilin	1991	6.687	136	83	14	NA	NA	25	NA	NA	NA
teng 832	Japonica inbred	Jilin	1991	8.3235	142	NA	18	NA	83.5	25	NA	NA	NA
zhan jing 6 hao	Japonica inbred	Yunnan	1991	6.4545	182.5	110	23	NA	NA	29	NA	1.91	105
kun jing 4 hao	Japonica inbred	Yunnan	1991	7.425	165	90	20	NA	89	30	NA	NA	NA
gan zao xian21 hao	Indica inbred	Jiangxi	1991	11.25	115	89	NA	4.5	81.5	30.1	NA	NA	NA
jing hua 101	Japonica inbred	Beijing	1991	9	175	112.5	NA	NA	79	29	NA	NA	NA
xie you 3550	Indica hybrid	Guangdong	1992	5.799	130	97.5	NA	2.625	84	26.5	130	NA	109.2
heng liang you 1 hao	Indica hybrid	Hunan	1992	8.25	117	97.5	NA	NA	70	28	NA	NA	NA
wei you 481	Indica hybrid	Guizhou	1992	8.4165	155	88	23.1	NA	78.7	27.1	NA	NA	NA
xiu shui 122	Japonica inbred	Shanghai	1992	7.4865	152.5	95	14	NA	86	26.5	NA	NA	NA
long jing 3 hao	Japonica inbred	Heilongjiang	1992	6.6412	NA	82.5	NA	NA	90	27	NA	NA	NA
jin dao 681	Japonica inbred	Tianjin	1992	7.827	165	90	15	NA	80	23	NA	NA	NA
jing hua 103	Japonica inbred	Beijing	1992	6.75	132.5	100	NA	NA	87.5	25.5	NA	NA	NA
ying feng 1 hao	Japonica inbred	Beijing	1992	7.5	145	87.5	NA	NA	95	28	NA	NA	NA
jing xian89	Indica inbred	Guangdong	1992	6.123	132	98	NA	3.3	80	19.5	137	NA	109.6
dong nong 416	Japonica inbred	Heilongjiang	1992	7.5264	NA	87.6	NA	NA	84	26.3	NA	NA	NA
liao jing 326	Japonica inbred	Liaoning	1992	7.3125	160	105	19	NA	NA	26	NA	NA	NA
sui jing 1 hao	Japonica inbred	Heilongjiang	1992	7.4969	NA	85	NA	NA	83	27	NA	NA	NA
lu qing zao 1 hao	Indica inbred	Guangdong	1992	5.6553	108	88	NA	4.05	79	26.5	82	NA	64.78
ning jing 14 hao	Japonica inbred	Ningxia	1992	10.983	140	80	14	NA	NA	27	NA	NA	NA
san yang ai 1 hao	Indica inbred	Guangdong	1992	6.19125	129	95	NA	3.45	74	21	122	NA	90.28
jiu dao 12 hao	Japonica inbred	Jilin	1992	8.0535	NA	100	16.5	NA	NA	25	NA	NA	NA
wu gong 1 hao	Indica inbred	Shanghai	1992	5.25	125	77.5	18	3	80	20	90	NA	72
ning jing 13 hao	Japonica inbred	Ningxia	1992	11.2155	135.5	90	10	NA	NA	28	NA	NA	NA
ji 87-1	Japonica inbred	Ningxia	1992	10.7865	NA	83	14.5	NA	NA	26	NA	NA	NA
teng xi 137	Japonica inbred	Heilongjiang	1992	7.3534	NA	85	NA	NA	NA	25	NA	NA	NA
leng 11-2	Japonica inbred	Jilin	1992	7.1535	137.5	97.5	NA	NA	NA	26	NA	NA	NA
hei jing 6 hao	Japonica inbred	Heilongjiang	1992	6.3323	NA	92.5	NA	NA	NA	25	NA	NA	NA
yun jing 23 hao	Japonica inbred	Yunnan	1992	7.782	180	95	20	3.675	NA	26	NA	NA	100
yin gui zhan	Indica inbred	Guizhou	1992	6.9525	136	95	18.5	3	86.5	28.5	NA	3.3	130
xing yu 873	Indica inbred	Guizhou	1992	6.9255	140	100	20	NA	80	25.6	NA	NA	NA
gui fu xian2 hao	Indica inbred	Guizhou	1992	5.931	144	90	21.2	3.75	82	33	NA	3.1	NA
teng 747	Japonica inbred	Jilin	1992	8.1795	142	92	19	NA	90	25	NA	NA	NA
te san ai 2 hao	Indica inbred	Guangdong	1992	6.6825	136	97.5	NA	3.15	86	26	109	NA	93.74
shan you gui 99	Indica hybrid	Hunan	1993	7.5	122.5	105	NA	NA	87	26.5	NA	NA	NA
guang you 4 hao	Indica hybrid	Guangdong	1993	7.227	132.5	105	NA	3.135	85	23.9	143.5	NA	121.975
¢ñyou 323	Indica hybrid	Hunan	1993	7.245	116	86	NA	NA	77.6	25.5	NA	NA	NA
jin zhu 1 hao	Japonica inbred	Beijing	1993	6.75	145	90	NA	NA	96	NA	NA	NA	NA
jing hua 101	Japonica inbred	Tianjin	1993	7.785	NA	110	20.5	NA	80	28.5	NA	NA	NA
jing you 6 hao	Japonica hybrid	Beijing	1993	7.2	130	100	20	NA	87.5	28	NA	NA	NA
he xi 30 hao	Japonica inbred	Yunnan	1993	8.694	172	90	NA	5.25	NA	22.1	NA	NA	80.7
teng xi 144	Japonica inbred	Jilin	1993	7.32	124.5	90	14.6	NA	92.5	27	NA	NA	NA
zhe 733	Indica inbred	Ministry of Agriculture and Rural Affairs of the People¡®s Republic of China	1993	6.75	110	80	19.7	3.9	80	25.8	NA	2.8	NA
zhong hua 12 hao	Japonica inbred	Tianjin	1993	7.314	NA	110	20.5	NA	84	26	NA	NA	NA
zhong xin 1 hao	Japonica hybrid	Beijing	1993	8.25	145	92.5	NA	3.15	82.5	27.25	NA	2	NA
tong 31	Japonica inbred	Jilin	1993	7.725	141	105	19	NA	96	28	NA	NA	NA
he xi 24 hao	Japonica inbred	Yunnan	1993	8.232	172	100	NA	4.53	NA	25.1	NA	NA	80.3
tong xi 112	Japonica inbred	Heilongjiang	1993	7.054	NA	90	16	NA	84	27.3	NA	NA	NA
zhan jing 7 hao	Japonica inbred	Yunnan	1993	8.1675	185	100	23	3.195	NA	29.5	NA	NA	100
xiu shui 61	Japonica inbred	Shanghai	1993	8.7615	154	105	15	NA	90	28	100	NA	90
chu jing 12 hao	Japonica inbred	Yunnan	1993	8.72085	170	91	17	4.5	85	25.5	NA	NA	NA
hu jing 119	Japonica inbred	Shanghai	1993	7.1775	155	82.5	14	NA	90	26	80	NA	72
bao nong 2 hao	Japonica inbred	Shanghai	1993	7.8075	155	105	17	NA	90	27	100	NA	90
jiu dao 13 hao	Japonica inbred	Jilin	1993	8.28	148	90	18	NA	90	25.6	NA	NA	NA
ji jing 64 hao	Japonica inbred	Jilin	1993	7.95	136	97	19	NA	80	28	NA	NA	NA
chang bai 8 hao	Japonica inbred	Jilin	1993	7.14	130	90	NA	NA	90	26	NA	NA	NA
yan jing 19 hao	Japonica inbred	Jilin	1993	7.095	122	80.3	15.5	NA	90	26.7	NA	NA	NA
long jing 4 hao	Japonica inbred	Heilongjiang	1993	7.4581	NA	82.5	16	NA	NA	27	NA	NA	NA
he xi 15 hao	Japonica inbred	Yunnan	1993	7.8735	170	90	18.4	NA	NA	24.3	NA	NA	68
88-635	Japonica inbred	Yunnan	1993	8.055	186	105	NA	3.255	68.3	25	NA	NA	105.9
86-167	Japonica inbred	Yunnan	1993	7.089	175	85	18	NA	NA	27.5	NA	NA	90
huai zao 7 hao	Indica inbred	Hunan	1993	5.745	113	85	NA	NA	81	24.5	NA	NA	NA
te you 63	Indica hybrid	Jiangsu	1994	8.6409	140	NA	NA	NA	NA	NA	NA	NA	NA
wei you 647	Indica hybrid	Hunan	1994	7.17	130	90	NA	NA	80	27.5	NA	NA	NA
shan you 36fu	Indica hybrid	Ministry of Agriculture and Rural Affairs of the People¡®s Republic of China	1994	6	128.5	91.5	NA	3.225	86.5	27.75	120	NA	103.8
you ¢ñ77	Indica hybrid	Hunan	1994	7.6539	114	92.5	NA	NA	NA	26	NA	NA	NA
shan you 72	Indica hybrid	Fujian	1994	6.261	128.5	97.5	NA	NA	NA	NA	NA	NA	NA
mei you 524	Indica hybrid	Guangdong	1994	6.45375	132.5	102.5	NA	2.775	85	27.5	120	NA	102
guang you 159	Indica hybrid	Guangdong	1994	6.4905	127.5	97.5	NA	2.85	NA	23.75	NA	NA	NA
shan you 96	Indica hybrid	Guangdong	1994	6.336	123	95	NA	2.85	85	25	120	NA	102
shan you 78	Indica hybrid	Fujian	1994	6.408	130	92.5	NA	NA	NA	NA	NA	NA	NA
zhen you 48-2	Indica hybrid	Zhejiang	1994	6.7275	128	NA	NA	NA	NA	NA	NA	NA	NA
¢òyou 92	Indica hybrid	Zhejiang	1994	7.116	123.5	NA	NA	NA	NA	NA	NA	NA	NA
shan you wan 3	Indica hybrid	Hunan	1994	7.5	117.5	100	23	NA	80	28	NA	NA	NA
mu dan jiang 20 hao	Japonica inbred	Heilongjiang	1994	9.6528	NA	94	19.6	NA	NA	NA	NA	NA	NA
long jin 1 hao	Japonica inbred	Jilin	1994	6.495	140	100	19	NA	80	20	NA	2	NA
jin dao 779	Japonica inbred	Tianjin	1994	7.095	172.5	97.5	NA	NA	NA	25	NA	NA	NA
jing you 6 hao	Japonica hybrid	Ningxia	1994	9.2874	150	85	15	NA	NA	27	85	NA	60
zu pei 7 hao	Japonica inbred	Jilin	1994	8.355	145	100	NA	NA	85	25	NA	NA	NA
jia zao 05	Indica inbred	Zhejiang	1994	6.756	NA	NA	NA	NA	NA	NA	NA	NA	NA
tai hu jing 2 hao	Japonica inbred	Jiangsu	1994	8.98995	163	NA	NA	NA	NA	NA	NA	NA	NA
hang 87-91	Indica inbred	Zhejiang	1994	6.843	109.5	NA	NA	NA	NA	NA	NA	NA	NA
feng xuan 2 hao	Japonica inbred	Jilin	1994	8.46	141	100	NA	NA	90	27	NA	NA	NA
wu dao 3 hao	Japonica inbred	Heilongjiang	1994	8.5967	NA	90	15.5	NA	NA	26.4	NA	NA	NA
ning zao 517	Indica inbred	Fujian	1994	5.826	125	85	NA	NA	NA	NA	NA	NA	NA
sheng you 2 hao	Indica inbred	Guangdong	1994	6.47475	135	102.5	NA	2.865	87.5	25.9	120	NA	105
nan jing yu xian	Indica inbred	Jiangsu	1994	7.61715	143	NA	NA	NA	NA	NA	NA	NA	NA
long chuan xian1 hao	Indica inbred	Jiangsu	1994	7.677	139	NA	NA	NA	NA	NA	NA	NA	NA
teng xi 140	Japonica inbred	Heilongjiang	1994	8.0836	NA	90	16	NA	NA	26	NA	NA	NA
yang dao 5 hao	Indica inbred	Jiangsu	1994	7.9383	142	NA	NA	NA	NA	NA	NA	NA	NA
zao gui ba	Indica inbred	Hunan	1994	6	127	98	22	NA	80	22	NA	NA	NA
bei lu 128	Japonica inbred	Jilin	1994	7.545	138	90	NA	NA	NA	26	NA	NA	NA
song jing 3 hao	Japonica inbred	Heilongjiang	1994	8.9199	NA	85	14	NA	NA	25	NA	NA	NA
qing xi 98	Japonica inbred	Ningxia	1994	9.77445	148	148	15	NA	NA	34.5	NA	NA	NA
ning you 1 hao	Japonica hybrid	Ningxia	1994	10.67745	150	100	17	NA	NA	27	NA	NA	90
ning xiang dao 1 hao	Japonica inbred	Ningxia	1994	8.6055	145	78.5	15	NA	NA	28.5	NA	1.82	NA
ai san lu zhan	Indica inbred	Guangdong	1994	5.1111	130	102.5	NA	3.4125	90	17.5	120	NA	108
shen xiang jing 4 hao	Japonica inbred	Shanghai	1994	7.95	155	95	NA	NA	NA	26	NA	NA	NA
siyou 9083	Japonica hybrid	Jiangsu	1994	8.9205	150	NA	NA	NA	NA	NA	NA	NA	NA
jiu dao 14 hao	Japonica inbred	Jilin	1994	8.49	137.5	100	19	NA	85	27	NA	NA	NA
yan jing 20 hao	Japonica inbred	Jilin	1994	8.215	148	90	16.25	NA	NA	24.3	NA	1.7	NA
tian jing 1 hao	Japonica inbred	Jilin	1994	7.68	135	95	NA	NA	NA	26	NA	NA	NA
chang xuan 1 hao	Japonica inbred	Jilin	1994	8.445	140	NA	18	NA	95	30	NA	NA	NA
mu dan jiang 22 hao	Japonica inbred	Heilongjiang	1994	7.299	NA	97	18.5	NA	NA	27.5	NA	NA	NA
mu dan jiang 21 hao	Japonica inbred	Heilongjiang	1994	7.9515	NA	80	21.5	NA	NA	26.1	NA	NA	NA
ai mei lu 1 hao	Indica inbred	Fujian	1994	6.1095	110	85	NA	NA	NA	NA	NA	NA	NA
gui qing ye	Indica inbred	Guangxi	1994	6	NA	NA	NA	NA	NA	NA	NA	NA	NA
yun jing 27 hao	Japonica inbred	Yunnan	1994	6.9975	186	110	7.5	3.6	NA	29	NA	NA	NA
xiang si miao 2 hao	Indica inbred	Guangdong	1994	6.75	NA	75	NA	NA	82.5	21.5	NA	NA	NA
chang bai 9 hao	Japonica inbred	Jilin	1994	7.5	130	95	NA	NA	90	29	NA	NA	NA
zhou 903	Indica inbred	Zhejiang	1994	6	108	83	NA	NA	82.1	26	NA	3.4	NA
shan you 149	Indica hybrid	Sichuan	1995	8.103	148	107	24	2.7	84	29	142	NA	119.28
xie you 413	Indica hybrid	Zhejiang	1995	6.768	135.5	102.5	NA	NA	NA	27.5	NA	NA	NA
bo you 210	Indica hybrid	Guangdong	1995	6.22695	118	88.8	NA	2.925	81	21.9	120.1	NA	97.281
gang you dong xi 1 hao	Indica hybrid	Sichuan	1995	8.106	150	115	NA	2.625	85	27	NA	NA	NA
shan you 195	Indica hybrid	Sichuan	1995	7.0065	NA	110	NA	NA	NA	NA	NA	NA	NA
luyou 502	Indica hybrid	Sichuan	1995	7.578	146.9	100	NA	NA	85	28	NA	NA	NA
jiang ¢òyou gan 18 hao	Indica hybrid	Jiangxi	1995	6.21255	127.5	106.6	NA	NA	NA	29.26	NA	NA	NA
wei you 402	Indica hybrid	Zhejiang	1995	7.3305	121	84	NA	NA	NA	NA	NA	NA	NA
gang you 22	Indica hybrid	Guizhou	1995	8.8065	153	106	NA	NA	77.1	26.9	NA	NA	NA
¢òyou 838	Indica hybrid	Sichuan	1995	8.2275	152	112.5	NA	NA	86.4	28.5	NA	NA	NA
zhong zao 1 hao	Indica inbred	Zhejiang	1995	7.3524	112	79	NA	NA	NA	NA	NA	NA	NA
zhongzuo93	Japonica inbred	Tianjin	1995	7.3665	167.5	100	NA	NA	NA	25.5	NA	NA	NA
c hao chan 1 hao	Japonica inbred	Jilin	1995	8.415	145	97.5	NA	NA	NA	26	NA	NA	NA
dong jing za 1 hao	Japonica hybrid	Hubei	1995	6.7545	130	90	NA	NA	NA	23.4	NA	NA	NA
ning jing 16 hao	Japonica inbred	Ningxia	1995	11.16675	150	90	16	NA	NA	25	NA	NA	NA
chang bai 9 hao	Japonica inbred	Ministry of Agriculture and Rural Affairs of the People¡®s Republic of China	1995	8.25	130	95	NA	NA	90	29	NA	NA	NA
tong 35	Japonica inbred	Jilin	1995	8.346	140	110	21	NA	95	28	NA	NA	NA
xiu shui 17	Japonica inbred	Shanghai	1995	8.2185	155	100	NA	NA	NA	25.25	107	NA	NA
teng 747	Japonica inbred	Ningxia	1995	11.2395	130	90	15	NA	NA	25	NA	NA	54.8
8you 161	Japonica hybrid	Shanghai	1995	9.495	161	115	NA	NA	85	27	150	NA	125
te san ai 2 hao	Indica inbred	Guizhou	1995	7.7265	155	90	NA	NA	82.5	26.9	NA	NA	NA
xianxiao zhan	Indica inbred	Guangdong	1995	5.0001	130	93.4	NA	3.405	84.85	16.9	NA	NA	NA
zao hua 2 hao	Japonica inbred	Tianjin	1995	7.5	157.5	95	17	NA	94	23	NA	NA	NA
gan zao xian37 hao	Indica inbred	Jiangxi	1995	4.9167	105	80	NA	NA	NA	24.21	NA	3.7	NA
dong zao 11 hao	Indica inbred	Hubei	1995	5.7675	108	NA	NA	4.095	73.7	25.2	NA	3.2	NA
hua jing za 1 hao	Japonica hybrid	Hubei	1995	6.4245	125	100	NA	NA	75	24	NA	NA	NA
jin feng	Japonica inbred	Jilin	1995	8.39	142	95	18.5	NA	93	26	NA	NA	NA
jiu dao 16 hao	Japonica inbred	Jilin	1995	7.635	138	100	18	NA	90	27	NA	NA	NA
he xi 30 hao	Japonica inbred	Sichuan	1995	9.354	164	85	NA	NA	88	23	NA	NA	NA
min ke zao 22	Indica inbred	Ministry of Agriculture and Rural Affairs of the People¡®s Republic of China	1995	6.45	116	85	NA	NA	NA	NA	NA	NA	NA
yongjing 44	Japonica inbred	Zhejiang	1995	5.8605	138	84	NA	NA	NA	NA	NA	NA	NA
liang xian2 hao	Indica inbred	Sichuan	1995	8.61	165	80	NA	3.97125	71.3	NA	NA	NA	NA
ning jing 15 hao	Japonica inbred	Ningxia	1995	12.4995	150	89	15	NA	NA	28	83	NA	NA
ning jing 17 hao	Japonica inbred	Ningxia	1995	11.3535	140	90	14	NA	NA	24	NA	NA	70
1987/9/1/zhou dong	Japonica inbred	Ningxia	1995	9.9513	150	102.5	20	NA	NA	29	NA	NA	NA
shen nong 514	Japonica inbred	Liaoning	1995	8.5485	158	91.5	17	NA	90	25	NA	NA	NA
ji nong da 3 hao	Japonica inbred	Jilin	1995	8.61	140	100	19	NA	95	27	NA	NA	NA
ao qing zhan	Indica inbred	Guangdong	1995	5.67195	128	96.5	NA	3	75.75	21.2	120	NA	90.9
hua pei 15	Japonica inbred	Shanghai	1995	8.391	155	105	19	NA	NA	26	126	NA	113
hua jing 45	Japonica inbred	Liaoning	1995	8.2695	158	90	15	NA	89.2	24.5	NA	NA	NA
shen nong 90-17	Japonica inbred	Liaoning	1995	8.8575	NA	95	NA	NA	85	25.5	NA	NA	NA
liao jing 244	Japonica inbred	Liaoning	1995	9.2625	154	95	NA	NA	NA	26.5	NA	NA	NA
ji jing 65 hao	Japonica inbred	Jilin	1995	8.595	NA	93.5	16.75	NA	85	25.1	NA	NA	NA
jiu dao 15 hao	Japonica inbred	Jilin	1995	8.344	143	92.5	18	NA	90	25	NA	NA	NA
jiu hua 1 hao	Japonica inbred	Jilin	1995	8.61	145	104	24	NA	NA	27	NA	NA	NA
hei jing 7 hao	Japonica inbred	Heilongjiang	1995	6.3768	NA	100	18	NA	NA	25	NA	NA	NA
zhe hu 894	Japonica inbred	Zhejiang	1995	6.291	140	85	NA	NA	NA	NA	NA	NA	NA
dong zhong 3 hao	Indica inbred	Hubei	1995	8.181	137	113	NA	NA	NA	28.5	NA	NA	NA
chu jing 14 hao	Japonica inbred	Yunnan	1995	9.5595	175	99	NA	4.5	80	24	117	NA	93.6
yun jing 33 hao	Japonica inbred	Yunnan	1995	8.274	185	108	21.5	3	NA	29	171.2	NA	127.7
wen dao 1 hao	Indica inbred	Yunnan	1995	7.179	155	95	NA	NA	NA	NA	NA	NA	NA
wen dao 2 hao	Indica inbred	Yunnan	1995	7.9635	152.5	94	NA	NA	83.8	29.2	NA	NA	NA
bi jing 37 hao	Japonica inbred	Guizhou	1995	6.4629	160	97.5	NA	NA	NA	25	NA	NA	82.5
gan zao xian38 hao	Indica inbred	Jiangxi	1995	5.6262	114	83.6	NA	NA	NA	22.8	NA	NA	NA
zhong si 2 hao	Indica inbred	Zhejiang	1995	5.682	NA	78	NA	NA	NA	NA	NA	NA	NA
te you 559	Indica hybrid	Jiangsu	1996	13.17975	138	110	NA	NA	90	28	NA	NA	NA
Kyou 402	Indica hybrid	Sichuan	1996	7.903	126	95	NA	NA	80	28	NA	NA	NA
pei za shan qing	Indica hybrid	Guangdong	1996	6.8175	129	102.5	NA	2.85	79	22	145	2.59	114.55
¢òyou 802	Indica hybrid	Sichuan	1996	8.682	150	NA	NA	NA	81.18	28	NA	NA	NA
zhu you 61	Indica hybrid	Guangdong	1996	5.9445	129	104	NA	NA	79.5	23	137.5	NA	109.3125
gang you 501	Indica hybrid	Sichuan	1996	8.745	146	108	NA	NA	80.3	26.3	NA	NA	NA
¢òyou dong 57	Indica hybrid	Sichuan	1996	8.4525	150	NA	NA	NA	87.2	27	NA	NA	NA
shan you 86	Indica hybrid	Sichuan	1996	7.8489	146	106	NA	NA	83.4	28.4	NA	NA	NA
jiang you 151	Indica hybrid	Sichuan	1996	8.05875	148	105.8	NA	2.7	87.43	30.9	NA	NA	NA
xie you 437	Indica hybrid	Jiangsu	1996	8.4993	141	115	NA	NA	90	26	NA	NA	NA
xie you gan 20 hao	Indica hybrid	Jiangxi	1996	6.1542	126.6	99.68	22.77	2.7705	75.79	23.17	138.3	NA	104.71
Kyou 5 hao	Indica hybrid	Sichuan	1996	8.64	144	112.5	NA	NA	85	29.5	NA	NA	NA
Dyou 162	Indica hybrid	Sichuan	1996	6.567	143	89.9	NA	NA	80	27.5	NA	NA	NA
zhong si 2 hao	Indica inbred	Jiangxi	1996	5.53275	107.7	80	NA	NA	85	22.9	81	3.05	68.85
zhong you zao 81	Indica inbred	Hunan	1996	6.063	106	80	NA	4.8525	85	24.25	75	3.53	63.75
jin xing 1 hao	Japonica inbred	Tianjin	1996	8.0415	172.5	105	16	NA	NA	28.5	NA	NA	NA
te xianzhan 13	Indica inbred	Guangdong	1996	5.92935	128	100	20	3.3	83	20	127	NA	105.41
zhong you zao 81	Indica inbred	Jiangxi	1996	5.0145	104.5	83	NA	4.65	80.4	23.44	68.7	3.2	55.2348
jin dao 308	Japonica inbred	Tianjin	1996	7.854	167.5	105	NA	NA	NA	27.5	NA	NA	NA
jing dao xuan yi	Japonica inbred	Tianjin	1996	7.8495	160	105	21	NA	93	29	NA	NA	NA
ji jing 15 hao	Japonica inbred	Hebei	1996	10.5	172.5	97.5	15	NA	NA	NA	NA	NA	NA
dong nong 419	Japonica inbred	Heilongjiang	1996	7.7266	NA	88.5	15.8	NA	NA	25.9	NA	NA	NA
jia yu 280	Indica inbred	Zhejiang	1996	7.032	108	75	NA	4.2	80	24.75	95	2.4	77.5
qi dai zhan 1 hao	Indica inbred	Guangdong	1996	5.25375	125	105	NA	2.775	NA	17	NA	NA	NA
tong 88-7	Japonica inbred	Jilin	1996	7.71	136	94.6	19.2	NA	NA	25.8	NA	NA	NA
gang fu 1 hao	Japonica inbred	Liaoning	1996	12.33765	170	97	14.5	NA	81.5	22.5	NA	NA	NA
qi xiu zhan 3 hao	Indica inbred	Guangdong	1996	4.95915	119	97.5	20	2.7	79	19	136.5	NA	107.835
hua xianzhan	Indica inbred	Guangdong	1996	5.31585	127.5	104.5	21	3.225	79	19	123.5	NA	97.565
long dong 101	Japonica inbred	Heilongjiang	1996	7.8515	130	95	NA	NA	NA	30	NA	NA	NA
xiang wan xian7 hao	Indica inbred	Hunan	1996	6.36	121	NA	NA	NA	NA	NA	NA	NA	NA
xiang zao xian22 hao	Indica inbred	Hunan	1996	5.835	105	82	NA	3.675	NA	23.5	NA	2.64	NA
san yuan 921	Indica inbred	Guangdong	1996	5.1201	118	93.55	NA	2.85	79	19	134.5	NA	106.255
zhen xian232	Indica inbred	Jiangsu	1996	8.01255	145	110	NA	NA	90	24.5	NA	NA	NA
gan zao xian40 hao	Indica inbred	Jiangxi	1996	5.3166	106.5	82	18.12	3.4965	79.67	25.52	71	3.3	56.76
teng xi 144	Japonica inbred	Heilongjiang	1996	7.6794	NA	87.5	16.4	NA	NA	26	NA	NA	NA
gao yuan jing 1 hao	Japonica inbred	Sichuan	1996	5.691	185	90	17	NA	70	26	NA	NA	NA
ji yu jing	Japonica inbred	Jilin	1996	7.745	135	97.5	NA	NA	90	25	NA	NA	NA
sidao 10 hao	Japonica inbred	Jiangsu	1996	8.085	151	90	NA	NA	85	25.5	NA	NA	NA
qiu feng	Japonica inbred	Shanghai	1996	9.24855	155	100	NA	3.3	90	27	107.5	NA	96.75
xiang jing 2 hao	Japonica inbred	Hunan	1996	5.9925	125	97	NA	NA	NA	28.9	NA	1.8	75.7
qing xiang jing	Japonica inbred	Shanghai	1996	7.5735	156	90	NA	3.75	90	27	97.5	NA	87.75
hu jing 06	Japonica inbred	Shanghai	1996	7.65	152	95	NA	3.9	90	26	95	NA	85.5
shen nuo 1 hao	Japonica inbred	Liaoning	1996	8.097	158	97.7	15.5	NA	79.9	23.5	NA	NA	NA
chang xuan 2 hao	Japonica inbred	Jilin	1996	7.925	136	95	17	NA	NA	28.5	NA	NA	NA
yan jing 21 hao	Japonica inbred	Jilin	1996	6.897	120	85	14	NA	90	27	NA	1.72	NA
sha 29	Japonica inbred	Jilin	1996	5.803	108	55	10	NA	85	24.5	NA	NA	NA
gan zao xian39 hao	Indica inbred	Jiangxi	1996	5.4507	108	71	17.67	3.729	75.17	22.81	75.63	NA	57.16
gan zao xian41 hao	Indica inbred	Jiangxi	1996	5.2197	111.7	80.75	18	3.9105	75.81	24.4	65.57	NA	51.42
gan wan xian25 hao	Indica inbred	Jiangxi	1996	6	128.9	92.3	19.95	3.696	68.18	23.84	87.68	3	60.38
gan wan xian26 hao	Indica inbred	Jiangxi	1996	5.046	132	87.3	NA	3.5895	82.3	22.8	111.9	NA	92.0937
te you 18	Indica hybrid	Guangxi	1997	7.0785	135	113	NA	NA	77.1	28	131	NA	101
¢òyou 3550	Indica hybrid	Guangdong	1997	7.10325	124	NA	NA	2.625	85	25	128	2.27	108.8
bo you 3550	Indica hybrid	Guangdong	1997	6.5253	120	92.5	NA	NA	82	22	NA	2.4	NA
te you 524	Indica hybrid	Guangdong	1997	7.2525	130	109	NA	NA	83	29	142.5	NA	118.275
shan you 4480	Indica hybrid	Guangdong	1997	5.76	126	97	NA	NA	82	24	144.5	NA	118.49
bo you 175	Indica hybrid	Guangxi	1997	7.69335	123	100	NA	NA	77.7	25.5	NA	NA	NA
xie you 914	Indica hybrid	Zhejiang	1997	5.986	136	102	NA	NA	80	23.5	NA	NA	NA
you you 4480	Indica hybrid	Guangdong	1997	6.357	122.5	94.5	NA	NA	83	23	NA	2.45	NA
zhi you gui 99	Indica hybrid	Guangxi	1997	6.4686	131	116	NA	NA	77.9	24	112.9	NA	87.9491
te you gui 99	Indica hybrid	Guangxi	1997	6.342	131	105.5	NA	NA	77.3	24.5	NA	NA	NA
¢òyou 746	Indica hybrid	Sichuan	1997	8.61885	NA	NA	NA	NA	80	27	NA	NA	NA
fu you 130	Indica hybrid	Sichuan	1997	8.53545	152	NA	NA	NA	84.7	29.3	NA	NA	NA
wei you 56	Indica hybrid	Hunan	1997	6.6885	113	85.8	NA	NA	71.5	30	NA	NA	NA
fu you 838	Indica hybrid	Sichuan	1997	8.016	145	115	NA	NA	87.5	28.5	NA	NA	NA
xin xiang you 77	Indica hybrid	Hunan	1997	6.78	114	97.9	NA	NA	73.5	27.9	NA	NA	NA
pei liang you yu hong	Indica hybrid	Hunan	1997	6.753	124	96.3	NA	NA	77.95	24.5	NA	NA	NA
shan you 18	Indica hybrid	Guangxi	1997	7.7535	134	114	NA	NA	69.78	28	139	NA	96.9942
bo you 4480	Indica hybrid	Guangxi	1997	6.1917	120	90	NA	NA	86.3	21	133	NA	114.779
gang you 734	Indica hybrid	Sichuan	1997	8.3175	150	116.1	NA	NA	85	27.6	NA	NA	NA
¢òyou 3028	Indica hybrid	Sichuan	1997	7.334	150	99.5	NA	NA	82.9	25.5	NA	NA	NA
ka you 6206	Indica hybrid	Sichuan	1997	7.2	153	94	NA	NA	85	30.6	NA	NA	NA
di you 151	Indica hybrid	Sichuan	1997	7.889	142	104	NA	NA	84.8	27.43	NA	NA	NA
hei you 1 hao	Indica hybrid	Sichuan	1997	7.125	156.1	109.9	NA	NA	76	26.1	NA	NA	NA
xin xiang you 80	Indica hybrid	Hunan	1997	7.23645	115.7	94.8	NA	NA	78.79	27.2	NA	NA	NA
Kyou 17	Indica hybrid	Sichuan	1997	7.925	140	110	NA	NA	85.9	30	NA	NA	NA
jin you 402	Indica hybrid	Hunan	1997	6.864	113	83.7	NA	NA	72.1	26.8	NA	NA	NA
gang you 906	Indica hybrid	Sichuan	1997	8.4783	145	114	23.4	NA	86.2	26.8	NA	NA	144
Dyou 68	Indica hybrid	Sichuan	1997	8.2935	NA	117	NA	NA	83.4	27.3	NA	2.89	NA
¢òyou 162	Indica hybrid	Sichuan	1997	8.9055	NA	NA	NA	NA	80	28	NA	NA	NA
ken yu 12 hao	Japonica inbred	Hebei	1997	8.85	175	112	15	NA	NA	25	NA	2	NA
lian jing 2 hao	Japonica inbred	Jiangsu	1997	9.351	NA	NA	NA	NA	90	27	115	NA	103.5
xiu shui 63	Japonica inbred	Zhejiang	1997	8.391	155	100	NA	NA	87.5	26	NA	NA	NA
jiu dao 19 hao	Japonica inbred	Jilin	1997	8.331	138	99	NA	NA	92.5	26.5	NA	NA	NA
zhong zao 4 hao	Indica inbred	Zhejiang	1997	5.757	110	NA	NA	NA	88	24	NA	NA	NA
zhongzuo23	Japonica inbred	Tianjin	1997	6.918	180	107.5	NA	NA	NA	25	NA	1.8	NA
zhongzuo17	Japonica inbred	Tianjin	1997	8.376	170	108.5	NA	NA	NA	26.5	NA	NA	NA
hua yu 3 hao	Japonica inbred	Tianjin	1997	7.863	167.5	105	19	NA	95.6	26.5	NA	NA	NA
ji jing 16 hao	Japonica inbred	Hebei	1997	9	177	110	15	NA	NA	26	NA	NA	NA
zao feng 9 hao	Japonica inbred	Jiangsu	1997	9.5025	NA	NA	NA	NA	90	27.5	100	NA	90
xiang zao xian24 hao	Indica inbred	Hunan	1997	6.618	109	74.2	NA	NA	83.8	24.4	NA	NA	NA
ji jing 66 hao	Japonica inbred	Jilin	1997	8.367	145	95	NA	NA	90	26	NA	NA	NA
wu yu jing 5 hao	Japonica inbred	Jiangsu	1997	9.0012	NA	NA	NA	NA	90	27.5	110	NA	99
zhen dao 88	Japonica inbred	Jiangsu	1997	9.391	149	98	NA	NA	90	27	115	NA	103.5
feng ai zhan 1 hao	Indica inbred	Guangdong	1997	6.0252	NA	99	22	3.45	72	20	126	NA	90.72
xiu shui 17	Japonica inbred	Zhejiang	1997	6.042	132	100	NA	NA	NA	26	NA	NA	NA
chu jing 17 hao	Japonica inbred	Yunnan	1997	9.75	176	98	NA	4.35	79	NA	NA	NA	NA
xiang zao xian23 hao	Indica inbred	Hunan	1997	6.408	105	78.25	NA	NA	84.9	24.7	NA	NA	NA
he xi 35 hao	Japonica inbred	Yunnan	1997	8.8035	174	100	21	4.05	78	25.7	NA	NA	NA
yan jing 5 hao	Japonica inbred	Jiangsu	1997	8.415	NA	NA	NA	NA	92	25	95	NA	87.4
sui jing 2 hao	Japonica inbred	Heilongjiang	1997	6.9723	NA	80	15	NA	NA	26.5	NA	NA	NA
xin yang 03	Indica inbred	Henan	1997	8.421	140	109	20.7	NA	80	25.7	NA	2	NA
jiu dao 18 hao	Japonica inbred	Jilin	1997	8.5167	141	97	NA	NA	88	26	NA	NA	NA
wu jing 6 hao	Japonica inbred	Jiangsu	1997	9.0272	NA	NA	NA	NA	92	25.5	NA	NA	NA
feng dao 9 hao	Japonica inbred	Yunnan	1997	8.3025	185	90	NA	NA	NA	26	NA	NA	NA
hang 931	Indica inbred	Zhejiang	1997	5.265	110	NA	NA	NA	NA	NA	NA	NA	NA
zhen fu 10 hao	Japonica inbred	Jilin	1997	8.0889	NA	105	NA	NA	NA	23.5	NA	NA	NA
ji nong da 7 hao	Japonica inbred	Jilin	1997	8.6015	145	100	20	NA	NA	26	NA	NA	NA
zhen xian272	Indica inbred	Jiangsu	1997	9.1263	140	110	NA	NA	90	30	120	NA	108
san yuan 93	Indica inbred	Guangdong	1997	5.57835	124	95	21	2.7	77	21	145	NA	111.65
zhen dao 4 hao	Japonica inbred	Jiangsu	1997	8.0175	NA	NA	NA	NA	90	26	97.5	NA	87.75
tai hu jing 6 hao	Japonica inbred	Jiangsu	1997	9.3291	122	95	NA	NA	90	26.5	110	NA	99
siyou 9022	Japonica hybrid	Jiangsu	1997	9.603	150	110	25	NA	80	25.5	180	NA	144
fu jing 3 hao	Japonica inbred	Liaoning	1997	8.349	151	91	17.6	NA	90	26.4	NA	NA	NA
shen nong 8801	Japonica inbred	Liaoning	1997	8.2425	157	102.5	17	NA	NA	27	NA	NA	NA
ji jing 67 hao	Japonica inbred	Jilin	1997	8.7795	140	95	NA	NA	90	25	NA	NA	NA
sui 88-2	Japonica inbred	Heilongjiang	1997	7.2242	NA	90	NA	NA	NA	NA	NA	NA	NA
long jing 6 hao	Japonica inbred	Heilongjiang	1997	7.6835	NA	90	17	NA	NA	26	NA	NA	NA
long jing 5 hao	Japonica inbred	Heilongjiang	1997	7.8648	NA	93	17	NA	NA	27	NA	NA	NA
quyu 860	Indica inbred	Zhejiang	1997	6.42	113	72.5	NA	NA	80	28	NA	NA	NA
zhe nong 921	Indica inbred	Zhejiang	1997	5.5005	NA	NA	NA	NA	75	27.5	NA	NA	NA
yun guo 1 hao	Indica inbred	Guangxi	1997	6.8535	125	82.5	NA	NA	95	24.1	NA	NA	NA
he xi 3 hao	Indica inbred	Guangxi	1997	5.1075	130	90	NA	NA	72.5	27.2	NA	NA	NA
he xi 34 hao	Japonica inbred	Yunnan	1997	8.58	180	89	18.2	4.95	80.5	26.5	NA	NA	NA
yang dao 6 hao	Indica inbred	Jiangsu	1997	3.1725	145	115	NA	NA	90	30	160	NA	144
yue xiang zhan	Indica inbred	Guangdong	1998	6.64665	129.5	93	NA	3.45	95	19	140	2.8	133
fu you 802	Indica hybrid	Sichuan	1998	8.0571	146	109.4	24	2.7	81.4	28	NA	NA	NA
Kyou 5 hao	Indica hybrid	Guizhou	1998	8.76	NA	NA	NA	NA	NA	NA	NA	NA	NA
xie you 57	Indica hybrid	Ministry of Agriculture and Rural Affairs of the People¡®s Republic of China	1998	9.091	143.5	110	NA	NA	84	27	NA	NA	NA
shan you 82	Indica hybrid	Fujian	1998	7.011	133	100	NA	NA	80	26	NA	2.4	NA
shan you 77	Indica hybrid	Ministry of Agriculture and Rural Affairs of the People¡®s Republic of China	1998	7.559	128	100	NA	2.85	80	27	NA	2.2	NA
Kyou 402	Indica hybrid	Ministry of Agriculture and Rural Affairs of the People¡®s Republic of China	1998	6.771	116.3	NA	10	3.3	82.5	29.5	NA	NA	NA
shan you dong xi 1 hao	Indica hybrid	Ministry of Agriculture and Rural Affairs of the People¡®s Republic of China	1998	8.396	150.5	110	NA	2.475	88.7	27.2	NA	NA	NA
bo you 96	Indica hybrid	Guangdong	1998	6.6084	119.5	98	NA	NA	85.48	23.3	127.5	NA	108.987
dong you 58	Indica hybrid	Hubei	1998	7.8675	143	105	22	3	85	27	NA	NA	110
shan you ming 86	Indica hybrid	Fujian	1998	6.6282	130	97.5	23.5	NA	87.5	28	NA	2.4	NA
shan you 559	Indica hybrid	Jiangsu	1998	9.87795	146	113	NA	NA	NA	27.5	190	NA	NA
¢òyou 92-4	Indica hybrid	Sichuan	1998	8.5395	152	118	25	NA	85	28	NA	NA	NA
hua you 63	Indica hybrid	Fujian	1998	6.2385	NA	97.5	NA	NA	82.5	27.2	NA	2.2	NA
wei you 89	Indica hybrid	Fujian	1998	6.7854	130	90	21	NA	82.5	27	NA	2.3	NA
pei you te san ai	Indica hybrid	Shaanxi	1998	9.2496	155	100.69	23	3.339	78	24.5	163.39	2.8	127.4442
D297you 63	Indica hybrid	Fujian	1998	6.198	NA	NA	NA	NA	85	NA	NA	3	NA
you ¢ñ130	Indica hybrid	Sichuan	1998	8.277	147.5	107	NA	NA	86.8	29.7	NA	NA	111.6
gang you 1313	Indica hybrid	Sichuan	1998	8.469	148	112.5	24	NA	85	29	NA	NA	NA
liu you 105	Indica hybrid	Sichuan	1998	6.5625	151	NA	NA	NA	80.5	29	NA	NA	NA
bo you 25	Indica hybrid	Guangxi	1998	5.739	125	100	25.2	NA	81.8	24	NA	NA	NA
shan you 136	Indica hybrid	Jiangsu	1998	9.47655	147	110	NA	NA	85	28.5	NA	NA	NA
xie you 249	Indica hybrid	Jiangsu	1998	9.4173	146	115	NA	NA	90	30	150	NA	135
xie you 925	Indica hybrid	Jiangsu	1998	9.3951	145	107	NA	NA	90	29.5	135	NA	121.5
shan you 371	Indica hybrid	Zhejiang	1998	6.126	122.6	NA	NA	NA	NA	NA	NA	NA	NA
zao you 49fu	Indica hybrid	Zhejiang	1998	6.6081	116	NA	NA	NA	NA	NA	NA	NA	NA
pei liang you 99	Indica hybrid	Guangxi	1998	7.524	NA	NA	NA	NA	82.5	22.5	NA	NA	NA
bo you 329	Indica hybrid	Guangxi	1998	6.1305	125	NA	NA	NA	81.1	24.5	NA	NA	NA
zhi you 25	Indica hybrid	Guangxi	1998	6.7065	125	NA	NA	NA	91	25.5	NA	NA	NA
wei you 467	Indica hybrid	Guizhou	1998	8.64	150	91	22	NA	85.1	NA	NA	NA	NA
you ¢ñ4761	Indica hybrid	Guizhou	1998	9.18	152	100	NA	NA	79	26.5	NA	NA	NA
¢òyou 7 hao	Indica hybrid	Sichuan	1998	8.7105	151	115	25.7	NA	NA	27.5	NA	NA	130
¢òyou 128	Indica hybrid	Guangdong	1998	6.492	120	102.5	NA	NA	85	25.5	145	NA	123.25
pei za shuang qi	Indica hybrid	Guangdong	1998	5.8095	128.5	98.5	NA	2.55	86.8	19	167.5	2.78	145.39
gang you 22	Indica hybrid	Ministry of Agriculture and Rural Affairs of the People¡®s Republic of China	1998	8.297	149.3	111.1	NA	2.475	83.49	26.5	NA	NA	NA
shan you wan 3	Indica hybrid	Hubei	1998	7.5903	121.1	100.4	NA	3.195	NA	29.2	NA	NA	96.6
te you dong xi 1 hao	Indica hybrid	Fujian	1998	6.6948	NA	100	NA	NA	85	28	NA	NA	NA
Kyou 195	Indica hybrid	Sichuan	1998	7.2	140	110	22.5	NA	82.5	29.5	NA	NA	NA
you you 122	Indica hybrid	Guangdong	1998	7.1955	126	101	NA	NA	84.1	25	133.5	2.92	112.2735
Kyou 130	Indica hybrid	Sichuan	1998	8.6373	149.3	112	24	NA	81	30.75	NA	3	116
fei you dong xi 1 hao	Indica hybrid	Sichuan	1998	7.6827	147.5	107.5	NA	NA	87.5	30	NA	3.1	NA
gang you 725	Indica hybrid	Sichuan	1998	8.5335	149	114.7	24.8	NA	NA	27	NA	NA	NA
¢òyou 838	Indica hybrid	Henan	1998	8.967	138	110	NA	NA	90	28.5	NA	NA	NA
liao yan 12 hao	Japonica inbred	Liaoning	1998	8.043	157	90	22	NA	95	26	NA	NA	NA
yu jing 6 hao	Japonica inbred	Ministry of Agriculture and Rural Affairs of the People¡®s Republic of China	1998	9	150	100	16	3.45	90	25.5	NA	NA	NA
zhen xian122	Indica inbred	Jiangsu	1998	8.8785	142	120	NA	2.7	90	28	135	NA	121.5
zhong fu 906	Indica inbred	Zhejiang	1998	5.22705	111.1	NA	NA	NA	NA	NA	NA	NA	NA
zhong you zao 5 hao	Indica inbred	Ministry of Agriculture and Rural Affairs of the People¡®s Republic of China	1998	4.782	112	76	NA	NA	75	NA	NA	3	NA
zhong si 2 hao	Indica inbred	Ministry of Agriculture and Rural Affairs of the People¡®s Republic of China	1998	5.699	112.5	85	NA	4.5	80	23.5	90	2.97	72
zhong zao 1 hao	Indica inbred	Ministry of Agriculture and Rural Affairs of the People¡®s Republic of China	1998	6.7	110	80	NA	NA	85	28	77.5	NA	65.875
zhongzuo93	Japonica inbred	Ministry of Agriculture and Rural Affairs of the People¡®s Republic of China	1998	6.69	165	97.5	NA	NA	93	25	NA	NA	NA
9204	Japonica inbred	Hebei	1998	7.5	145	85	18	NA	87.6	25.2	NA	NA	NA
long jing 8 hao	Japonica inbred	Heilongjiang	1998	7.2181	NA	85	15	NA	NA	23.5	NA	NA	NA
xiu shui 63	Japonica inbred	Shanghai	1998	7.95	152	97.5	NA	4.2	90	27	95	NA	85.5
he xi 39 hao	Japonica inbred	Yunnan	1998	9.16425	172	95	NA	NA	NA	24.5	NA	NA	NA
ji jing 69 hao	Japonica inbred	Jilin	1998	7.746	138	95	NA	NA	96	24.5	NA	NA	NA
ken dao 7 hao	Japonica inbred	Heilongjiang	1998	7.9735	NA	97.5	18.5	NA	NA	26.5	NA	NA	NA
jin zao 22	Indica inbred	Zhejiang	1998	6.015	110.5	NA	NA	NA	NA	30	NA	NA	NA
jia zao 43	Indica inbred	Zhejiang	1998	5.6145	105.7	NA	NA	NA	NA	NA	NA	NA	NA
te shuang 38	Indica inbred	Henan	1998	8.6565	137	100	NA	NA	NA	24.5	NA	2.06	NA
xiang zao xian27 hao	Indica inbred	Hunan	1998	7.2	111	84	20	NA	80	28	NA	3.3	NA
feng ai zhan 5 hao	Indica inbred	Guangdong	1998	5.9376	117.5	95	21	2.7	78	21	148	NA	115.44
nan jing 15 hao	Indica inbred	Jiangsu	1998	9.06975	136	105	NA	NA	90	25.5	150	NA	135
33512	Japonica inbred	Yunnan	1998	9.6936	175	97.5	16.7	NA	89.5	26	115	NA	95
tong 211	Japonica inbred	Jilin	1998	7.7625	NA	NA	NA	NA	94	24.5	NA	NA	NA
jiu dao 20 hao	Japonica inbred	Jilin	1998	8.007	135	95	NA	NA	90	26	NA	NA	NA
dong nong 420	Japonica inbred	Heilongjiang	1998	7.7193	NA	82.5	15.7	NA	NA	24.8	NA	NA	NA
ming zhu 1 hao	Japonica inbred	Zhejiang	1998	4.79055	117	NA	NA	NA	NA	NA	NA	NA	NA
long jing 7 hao	Japonica inbred	Heilongjiang	1998	7.8522	NA	90	16	NA	NA	26.5	NA	NA	NA
xin dao 90261	Japonica inbred	Henan	1998	7.0065	145	105	NA	NA	NA	NA	NA	NA	NA
minyou 128	Japonica hybrid	Shanghai	1998	9.465	156	105	17.5	2.85	NA	27	NA	NA	120
hu 43	Japonica inbred	Zhejiang	1998	6.8775	132.5	NA	NA	NA	NA	NA	NA	NA	NA
tong jing 109	Japonica inbred	Jiangsu	1998	9.08385	154	100	NA	NA	90.5	28.5	115	NA	104.075
xiang jing 111	Japonica inbred	Jiangsu	1998	9.2382	149	90	NA	NA	90	26.5	NA	NA	NA
zhen xiang jing 5 hao	Japonica inbred	Jiangsu	1998	9.08805	152	100	NA	NA	90	25	NA	NA	NA
chang nong jing 1 hao	Japonica inbred	Jiangsu	1998	9.75405	163	103	NA	NA	90	27.5	NA	NA	NA
su feng jing 1 hao	Japonica inbred	Jiangsu	1998	9.516	166	95	NA	NA	90	26.5	NA	NA	NA
siyou 88	Japonica hybrid	Jiangsu	1998	9.07425	153	100	NA	NA	NA	NA	160	NA	NA
liao nong 938	Japonica inbred	Liaoning	1998	8.202	152	90	NA	NA	80	25.5	NA	NA	NA
liao you 3225	Japonica inbred	Liaoning	1998	8.817	163	105	18	NA	NA	26.5	NA	NA	NA
ji nong da 8 hao	Japonica inbred	Jilin	1998	7.896	136	98	20	NA	90	26	NA	NA	NA
ji jing 70 hao	Japonica inbred	Jilin	1998	8.192	142	105	NA	NA	NA	25	NA	NA	NA
ji jing 68 hao	Japonica inbred	Jilin	1998	7.923	135	97.5	NA	NA	NA	29	NA	NA	NA
mu dan jiang 23 hao	Japonica inbred	Heilongjiang	1998	7.5746	136	98.3	17.2	NA	NA	26	NA	NA	NA
xiu shui 47	Japonica inbred	Zhejiang	1998	6.2739	133.9	NA	NA	NA	NA	NA	NA	NA	NA
tai 537	Japonica inbred	Zhejiang	1998	6.2685	132	NA	NA	NA	NA	NA	NA	NA	NA
zhe 1500	Indica inbred	Zhejiang	1998	8.4795	137.9	NA	NA	NA	NA	NA	NA	NA	NA
fu xian8 hao	Indica inbred	Zhejiang	1998	6.4044	111.4	NA	NA	NA	NA	NA	NA	NA	NA
jia he 7 hao	Indica inbred	Fujian	1998	12.3495	123	105	22	NA	90	31	NA	3.44	NA
long te zao	Indica inbred	Fujian	1998	7.02795	130	97.5	20	NA	90	30	NA	2.4	NA
wu liang 41	Japonica inbred	Yunnan	1998	7.6608	186	98.04	NA	3.3	74.4	25.5	132.8	NA	98.8032
lin you 1458	Indica inbred	Yunnan	1998	7.2225	180	110	22.5	NA	80	28	NA	NA	110
te xianzhan 25	Indica inbred	Guangdong	1998	6.33165	122	NA	NA	NA	NA	20.8	NA	NA	NA
bao nong 12	Japonica inbred	Shanghai	1998	7.95	156	102.5	NA	3.15	NA	26.5	107.5	NA	100
wu yun jing 7 hao	Japonica inbred	Jiangsu	1998	9.64965	159	95	NA	NA	93	27.5	NA	NA	NA
jia yu 948	Indica inbred	Zhejiang	1998	5.505	107.3	NA	NA	NA	NA	NA	NA	NA	NA
wu you dao 1 hao	Japonica inbred	Heilongjiang	1999	7.6633	NA	97	22	NA	NA	25	NA	NA	NA
sheng tai 1 hao	Indica inbred	Guangdong	1999	6.02235	116.5	95	23	2.7	76	23	142.5	NA	108.3
zhong zu 1 hao	Indica inbred	Zhejiang	1999	6.807	108	NA	NA	NA	NA	NA	NA	NA	NA
xie you 9308	Indica hybrid	Zhejiang	1999	7.9785	158	NA	NA	NA	NA	NA	NA	NA	NA
gang you 1577	Indica hybrid	Sichuan	1999	8.3235	147.4	110	24.1	NA	83.9	25.2	NA	NA	NA
yu you 10 hao	Indica hybrid	Chongqing	1999	9.30225	NA	NA	26	NA	85	26.5	NA	NA	NA
¢òyou 63	Indica hybrid	Zhejiang	1999	8.253	143	NA	NA	NA	NA	NA	NA	NA	NA
Kyou 17	Indica hybrid	Ministry of Agriculture and Rural Affairs of the People¡®s Republic of China	1999	7.0218	121.8	110	24	2.85	75.6	29.3	NA	NA	NA
you you 128	Indica hybrid	Guangdong	1999	7.128	130	110.5	NA	3	82	25	136	NA	111.52
wei you 402	Indica hybrid	Ministry of Agriculture and Rural Affairs of the People¡®s Republic of China	1999	7.1625	117	87.5	NA	3.15	80	29	NA	NA	NA
you ¢ñ402	Indica hybrid	Jiangxi	1999	6.75	116	88	NA	3.735	79	25.4	93	3.08	73.47
bo you wan 3	Indica hybrid	Guangdong	1999	6.267	121	103	NA	NA	80	24	NA	NA	NA
le you 2 hao	Indica hybrid	Sichuan	1999	8.4639	149.6	110	24.8	NA	79.8	27.8	NA	NA	NA
¢òyou 128	Indica hybrid	Ministry of Agriculture and Rural Affairs of the People¡®s Republic of China	1999	5.40375	137	125	NA	2.445	85	25.5	NA	NA	NA
¢òyou 2070	Indica hybrid	Zhejiang	1999	8.169	142	NA	NA	NA	NA	NA	NA	NA	NA
Kyou 404	Indica hybrid	Ministry of Agriculture and Rural Affairs of the People¡®s Republic of China	1999	7.216575	115.5	91	19.5	3.195	72.29	28.2	NA	NA	NA
Kyou 5 hao	Indica hybrid	Ministry of Agriculture and Rural Affairs of the People¡®s Republic of China	1999	8.61195	144	112.5	23	NA	85	29	NA	NA	NA
you you 128	Indica hybrid	Ministry of Agriculture and Rural Affairs of the People¡®s Republic of China	1999	7.52205	131	107.5	NA	2.7	80	24.5	NA	2.6	NA
you you 389	Indica hybrid	Ministry of Agriculture and Rural Affairs of the People¡®s Republic of China	1999	6.89865	123	101.5	NA	2.25	85	25.5	128.5	NA	109.225
¢òyou 92	Indica hybrid	Ministry of Agriculture and Rural Affairs of the People¡®s Republic of China	1999	6.75	125	90	NA	NA	80	25.5	130	NA	104
te you 18	Indica hybrid	Ministry of Agriculture and Rural Affairs of the People¡®s Republic of China	1999	7.1352	129	106	22.5	2.79	74	28.1	128.9	2.6	95.386
xin you gan 22 hao	Indica hybrid	Ministry of Agriculture and Rural Affairs of the People¡®s Republic of China	1999	6.94995	124.5	97.5	24.5	NA	80	31.5	127.7	2.7	102.16
zhi you 01	Indica hybrid	Guangxi	1999	6	115	96.2	NA	NA	NA	24.6	NA	NA	NA
you you 3550	Indica hybrid	Guangdong	1999	6.4965	122	89	NA	NA	80	24	140.5	NA	112.4
Kyou 926	Indica hybrid	Chongqing	1999	3.75	147	105	NA	2.625	83.9	28.6	NA	NA	NA
bo you gui 168	Indica hybrid	Guangxi	1999	5.83995	116	105	NA	2.85	87	NA	NA	NA	NA
xie you 9516	Indica hybrid	Zhejiang	1999	8.6295	138	NA	NA	NA	NA	NA	NA	NA	NA
te you 63-1	Indica hybrid	Guangxi	1999	7.11	125	110	NA	NA	NA	28.8	NA	NA	NA
Cyou 22	Indica hybrid	Sichuan	1999	8.46375	148	111.4	25.7	2.535	82	29.5	NA	NA	NA
hong you 5355	Indica hybrid	Sichuan	1999	8.35995	146.4	113.7	24.6	NA	82.87	29.7	NA	NA	NA
80you 151	Indica hybrid	Sichuan	1999	8.45415	147.5	113.1	24.6	NA	78.38	29.6	NA	NA	NA
shan you 92-4	Indica hybrid	Sichuan	1999	8.60625	149	110	24	NA	85	28	NA	NA	NA
shan you 94-4	Indica hybrid	Sichuan	1999	8.469	146	NA	23.7	2.733	82.7	26.9	NA	NA	NA
hong you 22	Indica hybrid	Sichuan	1999	8.6625	146	109.8	25.8	NA	86.07	29	NA	2.9	NA
xiang you 1 hao	Indica hybrid	Sichuan	1999	7.8975	151	110	NA	2.7	82	27	NA	NA	NA
jin you 2248	Indica hybrid	Sichuan	1999	7.697625	147	110	NA	NA	80	27.5	NA	NA	NA
you you wan 3	Indica hybrid	Guangdong	1999	6.2835	123	102.5	NA	NA	81.5	27	127	NA	103.505
pei liang you 275	Indica hybrid	Guangxi	1999	7.8615	130	105	NA	NA	NA	23	NA	NA	NA
gang you 364	Indica hybrid	Sichuan	1999	8.48865	147.8	114.9	NA	NA	80	26.7	NA	NA	NA
jin you 402	Indica hybrid	Jiangxi	1999	7.2	115	88	NA	3.705	77.6	25.3	103	3.28	79.928
you ¢ñ66	Indica hybrid	Ministry of Agriculture and Rural Affairs of the People¡®s Republic of China	1999	6.94005	118	82.5	19	NA	80	26.5	NA	2.6	NA
¢òyou 906	Indica hybrid	Sichuan	1999	8.61885	153	114	23.4	NA	85.2	26.6	NA	NA	138
gang you 881	Indica hybrid	Sichuan	1999	8.45445	148.2	NA	NA	NA	NA	27.5	NA	NA	NA
¢òyou 162	Indica hybrid	Zhejiang	1999	8.5095	149	NA	NA	NA	NA	NA	NA	NA	NA
¢òyou 838	Indica hybrid	Ministry of Agriculture and Rural Affairs of the People¡®s Republic of China	1999	9.06495	147.5	115	25	NA	90	29	NA	NA	NA
bao nong 12	Japonica inbred	Ministry of Agriculture and Rural Affairs of the People¡®s Republic of China	1999	8.7345	162.8	110.4	NA	3.15	NA	26.5	107.5	NA	100
wu yun jing 7 hao	Japonica inbred	Shanghai	1999	9.183	158	95	15.8	NA	90	28.5	NA	NA	NA
jiu dao 22 hao	Japonica inbred	Jilin	1999	8.7603	146	107.5	NA	NA	90	28	NA	NA	NA
liao yan 9 hao	Japonica inbred	Ministry of Agriculture and Rural Affairs of the People¡®s Republic of China	1999	7.32	157	87.5	22.5	NA	95	26	NA	1.98	100
ken dao 8 hao	Japonica inbred	Heilongjiang	1999	7.6379	NA	85	16.5	NA	NA	26	NA	NA	NA
liao jing 294	Japonica inbred	Ministry of Agriculture and Rural Affairs of the People¡®s Republic of China	1999	7.122	160	105	17	NA	NA	24.5	NA	NA	NA
hua yu 13 hao	Japonica inbred	Tianjin	1999	7.5435	167.5	105	20	NA	96	25	NA	NA	NA
jin xing 2 hao	Japonica inbred	Tianjin	1999	8.2845	170	106	16	NA	NA	26.5	NA	NA	NA
jin yuan 28	Japonica inbred	Tianjin	1999	8.0445	170	105	22	NA	93	28	NA	NA	NA
jin jing za 1 hao	Japonica hybrid	Tianjin	1999	8.4195	170	107.5	22	NA	92.5	29	NA	NA	122.5
ken yu 12 hao	Japonica inbred	Ministry of Agriculture and Rural Affairs of the People¡®s Republic of China	1999	5.397	170	110	17	NA	NA	26	NA	NA	NA
zhong nong dao 1 hao	Japonica inbred	Ministry of Agriculture and Rural Affairs of the People¡®s Republic of China	1999	8.25	165	90	17.3	NA	80	26	NA	NA	NA
c hao chan 1 hao	Japonica inbred	Ministry of Agriculture and Rural Affairs of the People¡®s Republic of China	1999	9.0915	145	97.5	NA	NA	NA	26	NA	NA	NA
zhen dao 6 hao	Japonica inbred	Ministry of Agriculture and Rural Affairs of the People¡®s Republic of China	1999	8.9265	160	100	NA	NA	90	25	120	NA	108
shan xi zhan 11	Indica inbred	Ministry of Agriculture and Rural Affairs of the People¡®s Republic of China	1999	5.5338	129.4	101	NA	NA	82	20.5	167.4	NA	137.268
te xianzhan 13	Indica inbred	Ministry of Agriculture and Rural Affairs of the People¡®s Republic of China	1999	7.0077	125	95	NA	3.075	83	20.5	NA	NA	NA
lian jing 2 hao	Japonica inbred	Ministry of Agriculture and Rural Affairs of the People¡®s Republic of China	1999	9.4845	154.5	105	16.17	NA	90	27.5	NA	NA	NA
tong yu 124	Japonica inbred	Jilin	1999	8.292	142	100	26	NA	95	27	NA	NA	NA
he xi 41 hao	Japonica inbred	Yunnan	1999	7.8261	172.5	92.5	NA	4.575	NA	24.6	NA	NA	NA
feng ao zhan	Indica inbred	Guangdong	1999	6.3321	125	98	NA	3	81	22	119	NA	96.39
lv huang zhan	Indica inbred	Guangdong	1999	6.04245	126.5	108	NA	3.3	83	20	122	NA	101.26
sui jing 3 hao	Japonica inbred	Heilongjiang	1999	7.5611	NA	79	15.7	NA	NA	27	NA	NA	NA
lu ao xiang	Japonica inbred	Jilin	1999	8.2466	146	95	NA	4.35	NA	27	NA	NA	NA
sui jing 4 hao	Japonica inbred	Heilongjiang	1999	7.2534	NA	95	17.6	NA	NA	27.7	NA	NA	NA
chang bai 9 hao	Japonica inbred	Heilongjiang	1999	7.732	NA	98.1	16.8	NA	NA	26.8	NA	NA	NA
jiu dao 24 hao	Japonica inbred	Jilin	1999	7.2263	130	95	18	NA	85	26.5	NA	NA	NA
he xi 40 hao	Japonica inbred	Yunnan	1999	7.72725	192.5	82.5	16	NA	70	25.8	NA	NA	NA
zhu fei xuan	Indica inbred	Zhejiang	1999	6.48	116.5	NA	NA	NA	NA	NA	NA	NA	NA
s hao xian1 hao	Indica inbred	Zhejiang	1999	6.99795	NA	NA	NA	NA	85	NA	NA	NA	87.5
he xi 42 hao	Japonica inbred	Yunnan	1999	7.5774	180	85	16	5.25	NA	24	NA	NA	NA
ji jing 73 hao	Japonica inbred	Jilin	1999	8.8926	146	96	25	NA	96	22.4	NA	2.5	NA
chang mi 011	Japonica inbred	Sichuan	1999	8.1315	165	85	19	NA	80	26	NA	NA	NA
you feng	Japonica inbred	Shanghai	1999	7.8	155	90	15	NA	93	24	NA	NA	NA
jia fu 16	Japonica inbred	Shanghai	1999	9.2205	140	80	NA	4.65	95	25.5	NA	NA	NA
qing nong jing 101	Japonica inbred	Shanghai	1999	7.95	152	100	15.5	3.75	95	25.5	115	NA	107.5
ji jing 77 hao	Japonica inbred	Jilin	1999	8.383	145	100	NA	NA	90	25.5	NA	NA	NA
ji jing 71 hao	Japonica inbred	Jilin	1999	8.0039	136	96	NA	NA	95	NA	NA	NA	NA
yan jing 22 hao	Japonica inbred	Jilin	1999	6.9285	129	90	13.4	NA	NA	24.2	NA	NA	NA
yan nong 1 hao	Japonica inbred	Jilin	1999	8.3056	122	80	17	NA	NA	26	NA	NA	NA
ji jing 72 hao	Japonica inbred	Jilin	1999	8.424	145	95	NA	NA	90	NA	NA	NA	NA
pu xuan 30	Japonica inbred	Heilongjiang	1999	7.6919	NA	92.5	17.5	NA	NA	26.5	NA	NA	NA
long jing 9 hao	Japonica inbred	Heilongjiang	1999	7.1959	NA	87.5	19.5	NA	NA	25	NA	NA	NA
ken xiang nuo 1 hao	Japonica inbred	Heilongjiang	1999	6.3365	NA	86	18	NA	NA	29	NA	NA	NA
yuan jing 7 hao	Japonica inbred	Zhejiang	1999	7.14	161	NA	NA	NA	NA	NA	NA	NA	NA
zhe nong da 402	Japonica inbred	Zhejiang	1999	6.7125	132	NA	NA	NA	NA	NA	NA	NA	NA
jia zao 41	Indica inbred	Zhejiang	1999	6.933	106.5	NA	NA	NA	NA	NA	NA	NA	NA
chu jing 22 hao	Japonica inbred	Yunnan	1999	5.08395	177.5	97.5	NA	NA	82.5	26.5	NA	NA	NA
hui 9203	Japonica inbred	Yunnan	1999	8.2215	190	90	19	NA	NA	25	NA	NA	115
chu jing 23 hao	Japonica inbred	Yunnan	1999	9.84615	172.5	97.5	NA	NA	85	23.5	NA	NA	NA
feng dao 11 hao	Japonica inbred	Yunnan	1999	7.40025	185	90	17	NA	NA	26	95	NA	80
jia zao 935	Indica inbred	Zhejiang	1999	6.9975	109	NA	NA	NA	NA	NA	NA	NA	NA
yan jing 23 hao	Japonica inbred	Jilin	2000	9.018	144	100	18.1	NA	NA	25.4	NA	NA	NA
zhou 903	Indica inbred	Hubei	2000	5.478	110	77.7	NA	NA	NA	23.1	NA	NA	NA
gang you 364	Indica hybrid	Ministry of Agriculture and Rural Affairs of the People¡®s Republic of China	2000	8.6955	148	117	NA	2.52	NA	NA	NA	NA	NA
liang you 363	Indica hybrid	Guizhou	2000	7.086	150	90	NA	3	75	28	NA	NA	90
qiu you 1025	Indica hybrid	Guangxi	2000	5.574	121	100	NA	2.925	83.5	18.65	NA	3.1	NA
Kyou 77	Indica hybrid	Guizhou	2000	7.86	147	85.3	21.1	NA	86.4	28.3	NA	NA	112.2
jin you gui 99	Indica hybrid	Guizhou	2000	9.309	147	92.9	23.6	2.565	80.7	27.2	NA	NA	NA
pei za mao san	Indica hybrid	Guangdong	2000	6.63	127.5	100	20	3	81.5	20	148.5	3.2	121.0275
jin you 10 hao	Indica hybrid	Sichuan	2000	7.899	150	107	NA	2.61	83.8	26	NA	2.75	NA
Kyou 40	Indica hybrid	Sichuan	2000	8.094	147	NA	NA	2.55	85	29.5	NA	NA	NA
¢òyou dong xi 1 hao	Indica hybrid	Guizhou	2000	9.07725	150.2	115	NA	NA	85	27	NA	NA	NA
¢òyou 46	Indica hybrid	Guizhou	2000	7.5435	159	91.2	21.9	NA	77.6	27.3	NA	NA	NA
¢òyou 6078	Indica hybrid	Guizhou	2000	9.2115	160	117.5	NA	NA	90	28	NA	NA	NA
jin you wan 3	Indica hybrid	Guizhou	2000	8.6175	142	90	NA	3	80	NA	NA	NA	NA
pei za 67	Indica hybrid	Guangdong	2000	6.2865	129	109	21	2.55	78	19	157	NA	122.46
Kyou 8149	Indica hybrid	Sichuan	2000	8.0565	149.4	110	NA	NA	83.4	30.8	NA	2.86	NA
gang you 2009	Indica hybrid	Sichuan	2000	8.253	150	112	NA	2.4	83	27	NA	2.5	NA
gang you 94-11	Indica hybrid	Sichuan	2000	8.2245	148.9	117.8	25	NA	84.4	28.7	NA	NA	NA
gang you 615	Indica hybrid	Sichuan	2000	8.079	148.8	116.6	NA	NA	85	27.9	NA	NA	NA
chuan feng 3 hao	Indica hybrid	Sichuan	2000	8.001	153	114.9	24	2.367	84.4	28.5	NA	NA	NA
Dyou 193	Indica hybrid	Sichuan	2000	7.7355	152	115	26	2.25	85	28	NA	2.9	NA
jin you 253	Indica hybrid	Guangxi	2000	6.5085	118	119	26	2.55	85	25	NA	3.1	NA
you ¢ñ98	Indica hybrid	Zhejiang	2000	6.7695	115.8	NA	NA	NA	NA	NA	NA	NA	NA
pei za yue ma	Indica hybrid	Guangdong	2000	6.4125	132	105	21	3.15	79.5	21	145	NA	115.275
¢òyou 63	Indica hybrid	Guizhou	2000	8.706	163.2	95.7	23	NA	79	27.1	NA	NA	NA
te you 559	Indica hybrid	Guizhou	2000	8.646	151	100	NA	NA	85	28	NA	NA	NA
xie you 63	Indica hybrid	Guizhou	2000	8.25	143	102	NA	2.736	84.8	32.8	NA	NA	NA
gang you 12	Indica hybrid	Guizhou	2000	9.402	154	96.2	NA	3	81.5	28.1	NA	NA	NA
¢òyou dong xi 1 hao	Indica hybrid	Sichuan	2000	8.3205	150.2	115	NA	NA	NA	NA	NA	NA	NA
you ¢ñ402	Indica hybrid	Guangxi	2000	7.383	110	95	NA	2.7	85	26	NA	2.6	NA
shan you 149	Indica hybrid	Guizhou	2000	8.1	148	107	24	2.7	84	29	NA	NA	NA
gang you 151	Indica hybrid	Guizhou	2000	7.69995	153	119	NA	NA	80	29	NA	NA	NA
shan you 70	Indica hybrid	Fujian	2000	9.078	170	NA	NA	NA	85	28	160	NA	136
xie you wan 3	Indica hybrid	Anhui	2000	7.122	138	110	NA	NA	80	30	NA	NA	NA
te you 175	Indica hybrid	Fujian	2000	7.449	127	NA	NA	NA	85	28	148	NA	125.8
¢òyou 3027	Indica hybrid	Zhejiang	2000	6.639	134.8	NA	NA	NA	NA	NA	NA	NA	NA
si you 63	Indica hybrid	Guizhou	2000	8.2485	160	110	NA	NA	80	26.5	NA	NA	NA
bo you 122	Indica hybrid	Guangdong	2000	6.225	117	96	22	3.15	82.5	22.7	132	2.69	108.9
liang you 2163	Indica hybrid	Fujian	2000	6.959	130	NA	NA	NA	85	29.2	NA	NA	NA
pei za mao xuan	Indica hybrid	Guangdong	2000	7.3545	111	94	20	2.55	81.5	21	152.5	NA	124.2875
Kyou 195	Indica hybrid	Guizhou	2000	7.4115	159	95.5	21.2	NA	80.4	28	NA	NA	113.3
gang you 130	Indica hybrid	Sichuan	2000	8.2659	149.8	117.8	25	2.319	84.4	28.7	NA	2.4	NA
jin dao 1229	Japonica inbred	Tianjin	2000	7.1745	145	115	NA	NA	88	26.5	NA	1.9	NA
Cyou 130	Indica hybrid	Sichuan	2000	8.2875	150.2	117.6	24	2.4	80.8	30	NA	2.8	NA
gang you 94-4	Indica hybrid	Sichuan	2000	8.16	150.2	114.9	23.9	NA	86.7	27.1	NA	2.4	NA
Kyou 817	Indica hybrid	Sichuan	2000	8.31045	146.4	108.8	24.5	2.304	84.53	30.68	NA	2.9	128.19
Dyou 361	Indica hybrid	Sichuan	2000	6.94125	146.3	94.8	24.2	2.238	87.3	26.5	NA	2.5	NA
Kyou 8725	Indica hybrid	Sichuan	2000	8.139	148	110	NA	2.184	86.8	NA	NA	2.8	134.4
9you 418	Japonica hybrid	Ministry of Agriculture and Rural Affairs of the People¡®s Republic of China	2000	9.2145	NA	122.5	25	NA	82.5	26.5	NA	NA	NA
jiu dao 23 hao	Japonica inbred	Jilin	2000	8.7915	142	100	NA	NA	90	26.2	NA	NA	NA
¢òyou 1313	Indica hybrid	Sichuan	2000	8.3415	153	115	24	2.7	NA	28	NA	NA	NA
gang you 19	Indica hybrid	Sichuan	2000	8.68035	150.8	111.5	NA	NA	85	25.8	NA	2.2	NA
fu you 964	Indica hybrid	Fujian	2000	6.077	124	104	NA	NA	84.75	25	NA	NA	NA
shan you 94-11	Indica hybrid	Guizhou	2000	8.7705	146	108.1	NA	NA	84	28	NA	NA	NA
jin liang you 36	Indica hybrid	Fujian	2000	7.676	150	NA	NA	NA	82	NA	NA	NA	NA
jin you 431	Indica hybrid	Guizhou	2000	8.8785	151	94.1	NA	NA	80	26	NA	NA	116
hua an 3 hao	Indica hybrid	Anhui	2000	8.445	142	120	NA	NA	80	27.5	200	NA	160
gang you jinhui 1 hao	Indica hybrid	Guizhou	2000	8.073	153.4	101.8	NA	2.2965	69.5	25.6	NA	NA	122.2
fu liang you 63	Indica hybrid	Fujian	2000	6.756	120	100.5	NA	NA	80	29	NA	NA	NA
fu you wan 3	Indica hybrid	Fujian	2000	6.872	133.8	100	NA	NA	83	26.5	NA	NA	NA
wei you 82	Indica hybrid	Fujian	2000	6.823	124	92.5	NA	NA	83	25.5	NA	NA	NA
te you gui 33	Indica hybrid	Guangxi	2000	9	138	113	NA	2.97	82.5	27.5	NA	NA	NA
liang you 211	Indica hybrid	Guizhou	2000	7.8225	149.7	82.6	NA	3.2205	NA	NA	NA	3.1	NA
wei you 431	Indica hybrid	Guizhou	2000	8.487	146	94	NA	2.73	84.7	28.8	NA	NA	NA
te you 420	Indica hybrid	Fujian	2000	7.594	142.5	114	NA	NA	87.2	29.4	NA	NA	NA
¢òyou 58	Indica hybrid	Guizhou	2000	8.6115	157	100	NA	NA	77	27.6	NA	NA	NA
Kyou 047	Indica hybrid	Sichuan	2000	7.719	147	108.9	NA	NA	83.9	26.8	NA	3	NA
gang you 527	Indica hybrid	Sichuan	2000	8.2995	149	118	25.5	2.124	86	29.5	NA	2.5	NA
¢òyou ming 86	Indica hybrid	Guizhou	2000	8.925	157	109	NA	NA	NA	28	NA	NA	152
Byou 840	Indica hybrid	Sichuan	2000	7.9704	145	108	NA	2.4165	82.4	26.7	NA	2.9	NA
jin you 63	Indica hybrid	Guizhou	2000	9.096	151	100	NA	2.805	77	28.4	NA	NA	NA
jin you 77	Indica hybrid	Guizhou	2000	8.7315	136	87.4	21.4	3.33	81.8	27.5	NA	NA	NA
xie you 963	Indica hybrid	Zhejiang	2000	7.746	128.2	NA	NA	NA	NA	NA	NA	NA	NA
gang you 182	Indica hybrid	Sichuan	2000	8.3145	150	107.5	24	2.25	88	28	NA	2.5	NA
liang you 2186	Indica hybrid	Fujian	2000	7.33	130	NA	NA	NA	87	NA	NA	NA	NA
fei you dong xi 1 hao	Indica hybrid	Guizhou	2000	9.5865	165	95	NA	NA	87.5	30	NA	NA	NA
Kyou 047	Indica hybrid	Guizhou	2000	8.4735	151.9	100	NA	2.9925	77.4	26.5	NA	NA	97.4
¢òyou 718	Indica hybrid	Sichuan	2000	8.4591	150	115	25	2.4	85	NA	NA	2.5	NA
gang you 527	Indica hybrid	Guizhou	2000	8.8125	153.7	108.5	NA	2.3295	76.7	NA	NA	NA	121.6
¢òyou 725	Indica hybrid	Guizhou	2000	8.2875	150	110	NA	NA	85	28	NA	NA	NA
jin you 207	Indica hybrid	Guizhou	2000	7.95	147	89	NA	NA	80	NA	NA	NA	NA
Dyou dong xi 1 hao	Indica hybrid	Sichuan	2000	8.1255	146.4	106	NA	2.775	83	26.4	NA	2.6	NA
¢òyou 725	Indica hybrid	Sichuan	2000	8.424	153.2	114	24.5	2.4	83.2	26.3	NA	2.5	NA
gang you 725	Indica hybrid	Guizhou	2000	8.643	149.2	114.7	NA	2.379	85.6	27	NA	NA	NA
Dyou 527	Indica hybrid	Guizhou	2000	8.67	155	110	NA	NA	80	29	NA	NA	NA
Dyou 13	Indica hybrid	Guizhou	2000	8.379	154	100.4	NA	2.5605	75.1	28	NA	NA	105.2
gang you 177	Indica hybrid	Sichuan	2000	8.28345	150	112.6	NA	NA	86.3	27.7	NA	2.4	NA
hua jing xian74	Indica inbred	Guangdong	2000	5.68185	116.5	96.5	20	2.85	82	21	132.5	NA	108.65
fu yuan 4 hao	Japonica inbred	Ministry of Agriculture and Rural Affairs of the People¡®s Republic of China	2000	9.4125	144	100	20.1	NA	98.3	26	NA	NA	NA
bei dao 1 hao	Japonica inbred	Heilongjiang	2000	8.311	NA	89	17.4	NA	NA	26	NA	1.6	NA
yue xiang zhan	Indica inbred	Ministry of Agriculture and Rural Affairs of the People¡®s Republic of China	2000	6.6285	125	87.5	19	3.6	87.5	19.25	NA	NA	NA
jin xing 1 hao	Japonica inbred	Ministry of Agriculture and Rural Affairs of the People¡®s Republic of China	2000	8.2755	175	106	16	NA	NA	28.5	NA	NA	NA
jiu dao 22 hao	Japonica inbred	Ministry of Agriculture and Rural Affairs of the People¡®s Republic of China	2000	10.482	153	105	20	5.805	86.9	27	NA	NA	NA
jiu dao 23 hao	Japonica inbred	Ministry of Agriculture and Rural Affairs of the People¡®s Republic of China	2000	8.805	147	100	19	NA	82.9	25.7	96.6	NA	80.0814
yongjing 18	Japonica inbred	Zhejiang	2000	7.3425	139.1	NA	NA	NA	NA	NA	NA	NA	NA
tong 35	Japonica inbred	Ningxia	2000	9.879	145	95	17.9	NA	NA	27	NA	NA	85
zhe fu 910	Indica inbred	Zhejiang	2000	7.275	104.7	NA	NA	NA	NA	NA	NA	NA	NA
ji jing 75 hao	Japonica inbred	Jilin	2000	8.0265	136	96	23	NA	95	26	NA	NA	NA
yongyou 1 hao	Japonica hybrid	Zhejiang	2000	7.077	133.8	NA	NA	NA	NA	NA	NA	NA	NA
nan xia 060	Indica inbred	Fujian	2000	5.219	120.7	NA	NA	NA	79.3	26.1	NA	NA	NA
lv yuan zhan 1 hao	Indica inbred	Guangdong	2000	5.6379	118	97	21	3	80	22	132.5	3.3	106
ning jing 22 hao	Japonica inbred	Ningxia	2000	10.167	145	90	16	NA	NA	26	90	NA	80
yue jing 2 hao	Japonica inbred	Zhejiang	2000	6.09	134	NA	NA	NA	NA	NA	NA	NA	NA
ning jing 20 hao	Japonica inbred	Ningxia	2000	10.4865	145	90	18	NA	NA	33.5	NA	NA	NA
hang 959	Indica inbred	Zhejiang	2000	6.174	107.5	NA	NA	NA	NA	NA	NA	NA	NA
ji jing 74 hao	Japonica inbred	Jilin	2000	8.2365	136	96	23	NA	96	28	NA	1.89	NA
huai dao 5 hao	Japonica inbred	Jiangsu	2000	9.489	150	105	NA	NA	92.5	28	NA	NA	NA
ning jing 21 hao	Japonica inbred	Ningxia	2000	9.3765	140	80	15.6	NA	NA	NA	NA	NA	70
ning you 2 hao	Japonica hybrid	Ningxia	2000	12.2115	150	90	NA	NA	NA	27	NA	NA	NA
wan dao 60	Japonica inbred	Anhui	2000	7.6275	130	87.5	NA	NA	85	28	95	NA	80.75
c hao chan 2 hao	Japonica inbred	Jilin	2000	8.712	137	94	17	NA	92	25	NA	NA	NA
long dao 1 hao	Japonica inbred	Heilongjiang	2000	8.107	NA	92	17	NA	NA	28	NA	NA	NA
jin dao	Japonica inbred	Shanxi	2000	8.865	155	90	17.5	NA	91.6	25	NA	1.6	NA
yan zu pei 1 hao	Japonica inbred	Jilin	2000	7.9101	125	85	17	NA	90	24	NA	NA	NA
jiu dao 21 hao	Japonica inbred	Jilin	2000	8.8665	142	117.5	NA	NA	87.5	26.5	NA	NA	NA
jiu dao 26 hao	Japonica inbred	Jilin	2000	8.2497	145	95	18	NA	90	27	NA	NA	NA
sui jing 5 hao	Japonica inbred	Heilongjiang	2000	8.1621	NA	86.5	16.5	NA	NA	26.6	NA	NA	NA
song jing 4 hao	Japonica inbred	Heilongjiang	2000	8.6773	NA	97.5	16	NA	NA	26	NA	1.5	NA
mu dan jiang 24 hao	Japonica inbred	Heilongjiang	2000	8.3815	NA	85.4	16.8	NA	NA	27.6	NA	NA	NA
long jing 10 hao	Japonica inbred	Heilongjiang	2000	8.1258	NA	92.5	16.5	NA	NA	24	NA	2	NA
dong nong 421	Japonica inbred	Heilongjiang	2000	8.1814	NA	92.5	16.5	NA	NA	26.8	NA	1.6	NA
jia yu 16	Indica inbred	Zhejiang	2000	6.744	100	NA	NA	NA	NA	NA	NA	NA	NA
jia zao 12	Indica inbred	Zhejiang	2000	6.789	103	NA	NA	NA	NA	NA	NA	NA	NA
jin zao 50	Indica inbred	Zhejiang	2000	7.092	110.7	NA	NA	NA	NA	NA	NA	NA	NA
lian xuan 18	Indica inbred	Fujian	2000	6.093	119	NA	NA	NA	83	26.5	NA	NA	NA
lian yu 3 hao	Indica inbred	Guangxi	2000	6.831	125	104	23	2.925	78.3	21.6	NA	2.9	NA
qian hui 15	Indica inbred	Guizhou	2000	7.9425	155	100	NA	2.7	85	27	NA	NA	107.5
an jing 698	Japonica inbred	Guizhou	2000	7.338	163.5	103.4	NA	3.18	87.05	27	NA	NA	NA
xin dao 9 hao	Japonica inbred	Xinjiang	2000	10.5	160	NA	16.8	NA	85	29	NA	2.3	NA
jia yu 948	Indica inbred	Hubei	2000	6.3831	108	73.6	NA	NA	78.2	23.1	NA	NA	NA
shen nong 265	Japonica inbred	Liaoning	2001	8.0145	158	102.5	16	NA	NA	26	NA	1.6	NA
xiu shui 110	Japonica inbred	Shanghai	2001	8.5845	156	100	NA	NA	92.5	25.5	NA	NA	NA
69you 8 hao	Japonica hybrid	Jiangsu	2001	9.7425	150	114	NA	NA	81	28	NA	NA	150
hua hang 1 hao	Indica inbred	Guangdong	2001	7.15395	129	100	20	3.15	86	20	132	NA	113.52
liao jing 371	Japonica inbred	Liaoning	2001	7.8885	155.5	107.5	21	NA	NA	25.3	NA	NA	NA
jin jing za 3 hao	Japonica hybrid	Tianjin	2001	8.5485	NA	NA	19.4	NA	86	24.8	NA	NA	NA
ji jing 78 hao	Japonica inbred	Jilin	2001	7.8885	138	97.5	NA	NA	NA	25.5	NA	NA	NA
yue feng zhan	Indica inbred	Guangdong	2001	7.1442	130	104	21	3.3	83	20	136.5	NA	113.295
jin jing za 2 hao	Japonica hybrid	Tianjin	2001	9.8475	175	116	22.8	2.7	80	27	190	NA	152
liao jing 288	Japonica inbred	Liaoning	2001	9.8175	160	102.5	16.5	NA	NA	26	NA	NA	NA
jiu dao 27 hao	Japonica inbred	Jilin	2001	8.7	141	105	18	NA	90	26	NA	1.8	NA
zhong 98-19	Indica inbred	Hunan	2001	6.7485	107	83	18	3.3	88.5	25	106	NA	93.81
jia yu 948	Indica inbred	Ministry of Agriculture and Rural Affairs of the People¡®s Republic of China	2001	5.505	107.5	78	NA	4.5	84	22.65	100	2.7	84
jin yuan 38	Japonica inbred	Tianjin	2001	8.8665	176	93	20	NA	89.6	26	NA	NA	NA
3you 18	Japonica hybrid	Ministry of Agriculture and Rural Affairs of the People¡®s Republic of China	2001	9.2205	150	115	21.3	2.7	80	26.3	180	NA	144
feng you 191	Indica hybrid	Guangxi	2001	8.049	130	102.5	NA	3.15	85	27.5	NA	3.1	NA
liang you pei jiu	Indica hybrid	Guangxi	2001	11.5125	132	115	23.5	3	81	26	NA	NA	NA
hong you 2009	Indica hybrid	Sichuan	2001	8.3265	150	NA	NA	NA	NA	30.3	NA	2.7	NA
gang you 3551	Indica hybrid	Sichuan	2001	8.694	151	111.6	24.4	NA	83.1	26.5	NA	NA	NA
xie you 7954	Indica hybrid	Zhejiang	2001	8.5125	141	NA	NA	NA	NA	NA	NA	4	NA
ba liang you 96	Indica hybrid	Guangxi	2001	6.5115	103	85	20	NA	80	24	110	NA	88
qing jiang 1 hao	Indica hybrid	Hubei	2001	8.6655	145	107.95	22.9	3.105	82.9	27	NA	NA	113.7
¢òyou 725	Indica hybrid	Hubei	2001	9.1485	NA	NA	NA	NA	NA	NA	NA	NA	NA
¢òyou 084	Indica hybrid	Jiangsu	2001	9.516	149	124	NA	NA	83	27.5	NA	2.6	150
¢òyou 162	Indica hybrid	Hubei	2001	9.1095	133	124.4	24.2	NA	78.7	28.8	NA	2.4	NA
jin you 974	Indica hybrid	Guangxi	2001	6.639	105	85	21	2.85	80	26.5	110	NA	88
jin you 402	Indica hybrid	Guangxi	2001	7.179	110	90	21	2.7	80	27	100	NA	80
hua you 229	Indica hybrid	Guangxi	2001	8.19	125	110.5	NA	2.7	84	25	NA	2.6	NA
hua you 8830	Indica hybrid	Guangxi	2001	7.4025	118	104.5	NA	3	85	23.5	NA	NA	NA
hua you 8813	Indica hybrid	Guangxi	2001	8.2725	120	97.5	NA	2.7	87	23.5	NA	NA	NA
hua you 128	Indica hybrid	Guangxi	2001	8.775	130.5	117	NA	2.85	85	24	NA	2.6	NA
zhong you 223	Indica hybrid	Ministry of Agriculture and Rural Affairs of the People¡®s Republic of China	2001	7.51215	124	105	21.6	3.435	85.1	22.3	140	NA	119.14
pei za 28	Indica hybrid	Guangdong	2001	6.4665	130	96.5	21	2.85	75	22	160.5	NA	120.375
pei za qing zhen	Indica hybrid	Guangdong	2001	6.4905	130	100	21	3.15	82	20	161	NA	132.02
feng you 128	Indica hybrid	Guangdong	2001	6.3105	128	105	22	2.7	79.5	24	127	3.2	100.965
hua you gui 99	Indica hybrid	Guangdong	2001	7.0185	129.5	104	22	3	84.5	23	134	2.9	113.23
jin you 182	Indica hybrid	Sichuan	2001	7.875	149	105	NA	NA	80	28	NA	NA	NA
pei liang you 288	Indica hybrid	Guangxi	2001	6.777	124	110	NA	2.7	87.5	23	NA	NA	NA
xiang liang you 68	Indica hybrid	Guangxi	2001	7.2435	106	86	NA	2.85	85.6	26.5	105	NA	89.88
jin you 63	Indica hybrid	Guangxi	2001	7.017	130	107.5	NA	2.85	77	26.25	NA	NA	NA
jin you 77	Indica hybrid	Guangxi	2001	7.245	120	96	NA	2.775	78	26.5	NA	NA	NA
xin xiang you 80	Indica hybrid	Fujian	2001	6.5595	128	100	NA	NA	80	25	NA	3	NA
Dyou dong xi 1 hao	Indica hybrid	Ministry of Agriculture and Rural Affairs of the People¡®s Republic of China	2001	7.9455	146	106	NA	2.775	83	26.4	NA	2.6	NA
xie you 963	Indica hybrid	Ministry of Agriculture and Rural Affairs of the People¡®s Republic of China	2001	7.2645	122.5	97.2	20.9	3.345	83.9	28.6	96.9	NA	81.2991
you you 122	Indica hybrid	Ministry of Agriculture and Rural Affairs of the People¡®s Republic of China	2001	6.71745	121.6	101	20.9	NA	81.3	24.5	127.1	NA	103.3323
hua you 86	Indica hybrid	Guangdong	2001	7.017	115	109	23	2.55	82	25	142	2.55	116.44
te you 128	Indica hybrid	Guangxi	2001	8.5275	130	110	NA	2.775	80	25.5	NA	NA	NA
Kyou 8615	Indica hybrid	Sichuan	2001	8.3205	149	113.3	22.7	NA	82.4	30	NA	NA	NA
te you 158	Indica hybrid	Fujian	2001	6.777	125.5	99.5	NA	NA	86.5	29	NA	2.4	NA
xian you 95	Indica hybrid	Guangxi	2001	7.4745	125	108	NA	2.775	85	22.3	NA	2.6	NA
feng you 207	Indica hybrid	Guangxi	2001	7.5375	122	100	NA	2.85	85	27	NA	NA	NA
zhong you 66	Indica hybrid	Guangxi	2001	7.359	102	93	NA	2.85	80	24	NA	NA	NA
¢òyou D069	Indica hybrid	Chongqing	2001	8.2395	160	115	25.8	NA	90	28	NA	2.5	NA
you ¢ñ5759	Indica hybrid	Guangxi	2001	7.9995	122	105	NA	2.925	70	22.5	NA	2.6	NA
Dyou 725	Indica hybrid	Sichuan	2001	8.223	153	113.2	25.3	NA	83.2	27	NA	NA	NA
jin you 364	Indica hybrid	Sichuan	2001	7.8885	150.7	112.4	24.68	NA	NA	27.03	NA	3	NA
zhu liang you 971	Indica hybrid	Hunan	2001	7.1385	109	90	20	3.3	83	26	102	NA	84.66
lu liang you 63	Indica hybrid	Hunan	2001	8.793	135	120	28	3	81.5	29	130	NA	105.95
gang you 669	Indica hybrid	Fujian	2001	7.0935	126	146	NA	NA	85.5	27.5	NA	2.7	NA
liang you pei jiu	Indica hybrid	Hubei	2001	8.89485	138.9	116.3	23.3	2.805	80.9	26.15	153.9	3	124.5
Dyou 68	Indica hybrid	Fujian	2001	8.478	147	110	NA	NA	85.27	28.5	NA	2.9	NA
Kyou 047	Indica hybrid	Ministry of Agriculture and Rural Affairs of the People¡®s Republic of China	2001	7.7955	149	109	NA	NA	83.9	26.8	NA	NA	114.7
xie you 46	Indica hybrid	Fujian	2001	6.75	125	92.5	NA	NA	87.5	28	NA	3	NA
¢òyou 501	Indica hybrid	Ministry of Agriculture and Rural Affairs of the People¡®s Republic of China	2001	8.9025	153	110	25	NA	84	26.1	NA	2.7	NA
Kyou 77	Indica hybrid	Ministry of Agriculture and Rural Affairs of the People¡®s Republic of China	2001	6.8085	117.3	101	21.8	3.075	76.7	28.2	105.6	NA	80.9952
¢òyou 15	Indica hybrid	Fujian	2001	5.77605	126	96	NA	NA	83	29	NA	2.5	NA
¢òyou ming 86	Indica hybrid	Ministry of Agriculture and Rural Affairs of the People¡®s Republic of China	2001	9.4827	150.8	107.5	25.6	2.43	81.8	28.2	163.6	NA	133.8248
guang ya 2 hao	Indica hybrid	Zhejiang	2001	6.684	131	NA	NA	NA	NA	NA	NA	NA	NA
you ¢ñ66	Indica hybrid	Fujian	2001	6.4275	121	94	NA	NA	86	25	NA	2.6	NA
zhong you 402	Indica hybrid	Jiangxi	2001	7.3845	115	95	NA	2.7	82.8	26	105	3.4	86.94
liu you 1025	Indica hybrid	Guangxi	2001	7.5105	125	110	NA	3	80	21	NA	3	NA
pei za nan sheng	Indica hybrid	Guangdong	2001	6.3405	129	103	22	2.85	79	20	141.5	NA	111.785
pei za 28	Indica hybrid	Guangxi	2001	7.338	129	105	NA	2.85	76	25	NA	NA	NA
pei za qing zhen	Indica hybrid	Guangxi	2001	7.461	130	107	NA	2.85	85	22	NA	NA	NA
shan you 122	Indica hybrid	Guangdong	2001	7.23	125	100	22	2.85	83.455	25.55	NA	2.6	NA
yue za 122	Indica hybrid	Guangdong	2001	6.5595	125	97	22	2.7	77.87	24.6	129	3.2	100.4523
yue you 8 hao	Indica hybrid	Guangdong	2001	6.9885	130	103	23	2.85	81	27	126.5	NA	102.465
pei za shuang qi	Indica hybrid	Ministry of Agriculture and Rural Affairs of the People¡®s Republic of China	2001	5.8095	128.5	101	NA	2.775	86.8	19	NA	2.9	NA
wei you 402	Indica hybrid	Guangxi	2001	7.776	113	100	22.5	3.15	82	NA	120	NA	98.4
te you 70	Indica hybrid	Ministry of Agriculture and Rural Affairs of the People¡®s Republic of China	2001	6.6243	147.5	97.5	24	NA	80	27.5	NA	NA	NA
te you dong xi 1 hao	Indica hybrid	Ministry of Agriculture and Rural Affairs of the People¡®s Republic of China	2001	6.69465	145	110	NA	2.8125	88	28.6	130	NA	114.4
you you 122	Indica hybrid	Guangxi	2001	8.25	118	97.5	NA	2.85	85	24	NA	2.7	NA
pei za mao san	Indica hybrid	Ministry of Agriculture and Rural Affairs of the People¡®s Republic of China	2001	6.63	127.5	100	NA	3	85	20.5	160	2.9	136
xie you 1429	Indica hybrid	Ministry of Agriculture and Rural Affairs of the People¡®s Republic of China	2001	6.87	124	104	22.1	2.52	79	26.7	138.5	NA	109.415
¢òyou 949	Indica hybrid	Sichuan	2001	8.1405	153	114	NA	NA	80	27.5	NA	2.6	NA
wei you 647	Indica hybrid	Guangxi	2001	7.4835	124	105.5	NA	2.85	85	30	NA	NA	NA
shan you 3550	Indica hybrid	Guangxi	2001	8.25	123	110	24.1	2.4	86.8	27.8	NA	NA	NA
wei you 404	Indica hybrid	Guangxi	2001	7.179	110	90	21.5	2.85	80	29.4	110	NA	88
shan you 647	Indica hybrid	Fujian	2001	6.75	127.5	97.5	NA	NA	83	NA	NA	2.4	NA
liang you pei te	Indica hybrid	Guangxi	2001	7.929	132.5	110	NA	2.925	85	22	NA	NA	NA
wei you 974	Indica hybrid	Guangxi	2001	7.4715	106.5	93	21	2.85	78.6	28.5	NA	NA	NA
you ¢ñ647	Indica hybrid	Guangxi	2001	7.1445	123	100	NA	3	85	27	NA	NA	NA
te you 77	Indica hybrid	Guangxi	2001	7.7505	118	100	NA	2.85	83	28	NA	NA	NA
ba liang you 100	Indica hybrid	Zhejiang	2001	6.609	111	NA	NA	NA	NA	NA	NA	NA	NA
shan you 402	Indica hybrid	Guangxi	2001	7.3125	113.5	90	NA	2.85	80	28	120	NA	96
bo you 01	Indica hybrid	Guangxi	2001	7.368	117	95	NA	3.15	75	23	NA	NA	NA
wei you 207	Indica hybrid	Guangxi	2001	7.146	122	100	NA	2.85	85	30	120	NA	102
bo you 752	Indica hybrid	Guangxi	2001	8.874	122	107.5	25	2.625	85	25	NA	2.5	NA
jin you 4480	Indica hybrid	Guangxi	2001	6.9585	119	90	NA	3.15	81	27	NA	NA	NA
you ¢ñ4480	Indica hybrid	Guangxi	2001	6.192	122	97	NA	2.85	83	25	NA	NA	NA
shan you 82	Indica hybrid	Guangxi	2001	7.425	123	100	NA	2.85	82.5	27	NA	2.4	NA
jin you 191	Indica hybrid	Guangxi	2001	6.951	120	106	NA	2.775	75	27	NA	NA	NA
pei za 67	Indica hybrid	Guangxi	2001	7.041	130	105	NA	2.7	75	22	NA	NA	NA
jin you 647	Indica hybrid	Guangxi	2001	6.774	122	107.5	NA	2.85	80	27	NA	NA	NA
jin you 12	Indica hybrid	Hubei	2001	6.1005	125	95.6	24.1	NA	72.6	28.1	NA	3.2	NA
Tyou 7889	Indica hybrid	Fujian	2001	6.561	129	95	NA	NA	79.1	25.4	NA	2.7	NA
wei you 191	Indica hybrid	Guangxi	2001	8.16	122	103	NA	2.925	75	30	NA	NA	NA
tian liang you 402	Indica hybrid	Guangxi	2001	7.1415	112	95	NA	3	81	27	115	NA	93.15
¢òyou gui 99	Indica hybrid	Guangxi	2001	7.296	128	105	NA	3	80	26.5	NA	NA	NA
zhu liang you 112	Indica hybrid	Hunan	2001	7.158	110	84	19	3.75	81	26	100	NA	81
shan you 207	Indica hybrid	Guangxi	2001	6.9345	125	100	NA	2.8125	80	27	125	NA	100
jin you 80	Indica hybrid	Guangxi	2001	7.4445	120	108	NA	2.85	85	26	NA	NA	NA
pei za 266	Indica hybrid	Guangxi	2001	7.53	125	106	NA	3	78	21	NA	3	NA
xin xiang you 207	Indica hybrid	Guangxi	2001	7.3575	122	106	NA	2.85	86	26	125	NA	107.5
shan you 253	Indica hybrid	Guangxi	2001	7.7088	130	112.5	NA	2.85	82.5	27	NA	NA	NA
you ¢ñ63	Indica hybrid	Guangxi	2001	7.5	125	100	NA	3	85	25.5	NA	NA	NA
you ¢ñ96	Indica hybrid	Guangxi	2001	7.299	120	100	NA	2.7	80	26.5	NA	NA	NA
ma ba yin zhan	Indica inbred	Guangxi	2001	5.505	120	95	NA	3.6	87.5	15	NA	3	NA
Cyou dong xi 1 hao	Indica hybrid	Sichuan	2001	8.6235	149	116.4	24.4	NA	80.2	30.7	NA	NA	NA
chuan you 75535	Indica hybrid	Sichuan	2001	7.521	153	114.9	NA	2.25	78.5	26.1	NA	NA	NA
Byou 838	Indica hybrid	Sichuan	2001	7.98	145	NA	NA	NA	NA	NA	NA	2.9	NA
gang you 118	Indica hybrid	Sichuan	2001	8.382	150.5	114.5	NA	NA	80.6	27.8	NA	NA	NA
gang you D069	Indica hybrid	Sichuan	2001	4.21575	150	116.5	NA	NA	81.1	NA	NA	NA	NA
¢òyou 95-18	Indica hybrid	Sichuan	2001	8.133	154.5	117.5	NA	NA	85	NA	NA	NA	NA
80you 364	Indica hybrid	Sichuan	2001	8.4315	149.6	111.7	24	NA	83.3	27.4	NA	2.75	NA
te you 253	Indica hybrid	Guangxi	2001	6.066	128	114	NA	2.55	87.5	27.5	NA	NA	NA
¢òyou 50329	Indica hybrid	Chongqing	2001	7.857	163	112.1	25.5	NA	84.1	26.7	NA	2.6	NA
te you 1012	Indica hybrid	Guangxi	2001	7.3005	125	110	NA	2.7	85	27	NA	NA	NA
zhong you 82	Indica hybrid	Guangxi	2001	7.3185	119	100	NA	2.775	82.5	24.5	NA	NA	NA
jin you 82	Indica hybrid	Guangxi	2001	7.1565	116.5	102.5	NA	2.775	82.5	24	NA	NA	NA
Kyou 88	Indica hybrid	Chongqing	2001	8.1921	156	110	25.4	NA	83.9	27.6	NA	NA	NA
jin you 66	Indica hybrid	Guangxi	2001	6.858	106	95	NA	3.075	82	24	NA	NA	NA
wei you 463	Indica hybrid	Guangxi	2001	7.6905	111	100	21.1	2.85	77.3	29	115	NA	88.895
zhong you 781	Indica hybrid	Guangxi	2001	7.305	123.5	110	24.5	2.7	81	26.5	NA	NA	NA
he you 3 hao	Indica hybrid	Chongqing	2001	9.03345	156	113	25	NA	85	26	NA	NA	NA
shan you 111	Indica hybrid	Hunan	2001	8.5965	137	117	22	2.85	81.5	28	130	NA	105.95
bo you 781	Indica hybrid	Guangxi	2001	7.6425	125	114	24	2.7	82.5	24	NA	2.5	NA
zhong you 4480	Indica hybrid	Guangxi	2001	6.5235	122	110	NA	2.85	82	25	NA	NA	NA
fu you 195	Indica hybrid	Hubei	2001	7.5465	153.3	96.5	19.8	2.7075	85.6	26.7	NA	NA	113.1
fu you 158	Indica hybrid	Fujian	2001	6.54	122.5	97.5	NA	NA	84.3	27.3	NA	2.5	NA
¢òyou 4480	Indica hybrid	Guangxi	2001	7.4475	122.5	105	NA	3.15	80	24.5	NA	NA	NA
bo you 205	Indica hybrid	Guangxi	2001	4.797	121	107.5	NA	2.775	77.5	21.5	NA	2.8	NA
¢òyou gui 34	Indica hybrid	Guangxi	2001	7.479	117.5	NA	NA	3	80	26	NA	NA	NA
wei you 96	Indica hybrid	Guangxi	2001	7.152	120	102	NA	3.225	80	29	NA	NA	NA
you ¢ñ4635	Indica hybrid	Guangxi	2001	6.7965	125	105	NA	3	81	25.8	NA	NA	NA
xiang you 207	Indica hybrid	Guangxi	2001	7.2645	122	107.5	NA	2.775	79	28	NA	NA	NA
ba liang you 63	Indica hybrid	Guangxi	2001	7.314	115	106	NA	3	85	NA	110	NA	93.5
yan liang you 921	Indica hybrid	Hunan	2001	7.3155	110	102	20	3.45	82.2	24	127	NA	104.394
jin you 404	Indica hybrid	Guangxi	2001	7.689	108	88	21.2	2.85	81	25.5	110	NA	89.1
you ¢ñ54	Indica hybrid	Guangxi	2001	6.903	126	115	NA	2.7	78	25.6	NA	NA	NA
you ¢ñ5012	Indica hybrid	Guangxi	2001	7.4565	124	98	NA	2.85	73	25	NA	NA	NA
¢òyou 36fu	Indica hybrid	Guangxi	2001	7.023	126	95	NA	2.775	82	24.5	NA	NA	NA
¢òyou 207	Indica hybrid	Guangxi	2001	6.699	128	107	NA	2.775	75	27.5	NA	NA	NA
jin you 96	Indica hybrid	Guangxi	2001	7.344	121	100	NA	2.85	75	26	NA	NA	NA
jin you 64	Indica hybrid	Guangxi	2001	7.263	120	98	NA	3	75	24	NA	NA	NA
you ¢ñ191	Indica hybrid	Guangxi	2001	7.344	121	100	NA	3	85	27	NA	NA	NA
wei you 298	Indica hybrid	Guangxi	2001	7.554	113	100	22.5	NA	81	30	NA	NA	NA
shan you 974	Indica hybrid	Guangxi	2001	6.852	108	90	21	2.85	80	28.5	100	NA	80
you ¢ñ1 hao	Indica hybrid	Guangxi	2001	6.873	110	98	NA	2.7	85	26	NA	NA	NA
feng you 838	Indica hybrid	Guangxi	2001	8.418	130	105	NA	3.15	85	28	NA	NA	NA
feng you 328	Indica hybrid	Guangxi	2001	7.9215	130	105	NA	3.15	85	28	NA	NA	NA
feng you 86	Indica hybrid	Guangxi	2001	7.893	138	116.5	NA	3	83.5	28	NA	NA	NA
feng you 63	Indica hybrid	Guangxi	2001	8.271	140	112.5	NA	2.85	85	28	NA	NA	NA
feng you gui 99	Indica hybrid	Guangxi	2001	8.1555	127.5	100	NA	3.15	85	28	NA	3.2	NA
you ¢ñT80	Indica hybrid	Guangxi	2001	5.72685	117.5	92.5	NA	3.225	85	25	NA	NA	NA
pei liang you 1025	Indica hybrid	Guangxi	2001	7.6665	127.5	102.5	NA	3	75	20.3	NA	3.2	NA
qiyou 1025	Indica hybrid	Guangxi	2001	7.449	130	107.5	NA	3	85	19	NA	3	NA
bo you xiang 1 hao	Indica hybrid	Guangxi	2001	6.4155	122	100	NA	2.925	82.2	21.5	NA	NA	NA
you ¢ñ01	Indica hybrid	Guangxi	2001	6.75	116.5	95	NA	3.15	87.5	23.5	NA	NA	NA
bo you 58	Indica hybrid	Guangxi	2001	6.213	116.5	100	24.5	2.55	88	23	NA	2.4	NA
xiang dong you 781	Indica hybrid	Guangxi	2001	7.5315	125	110	24	2.85	88	25	NA	3.2	NA
xiang dong you 253	Indica hybrid	Guangxi	2001	7.5315	125	112.5	24.2	2.85	85	25.5	NA	3.2	NA
hua you 838	Indica hybrid	Guangxi	2001	9.5775	123.5	113.5	NA	2.925	85	26	NA	2.6	NA
mei you gui 99	Indica hybrid	Guangxi	2001	6.777	125	115	NA	3.15	80	22.2	NA	3.1	NA
mei you 138	Indica hybrid	Guangxi	2001	7.692	126	108	NA	3.375	86	21.3	NA	3	NA
mei you 1025	Indica hybrid	Guangxi	2001	7.011	123	105	NA	3	83	21	NA	NA	NA
wei you 4480	Indica hybrid	Guangxi	2001	7.098	124	103	NA	3.15	80	28.5	NA	NA	NA
te you 4480	Indica hybrid	Guangxi	2001	7.152	128	103	NA	2.85	81.7	26	NA	NA	NA
fu you 402	Indica hybrid	Guangxi	2001	7.137	111.5	95	NA	2.85	85	26	NA	NA	NA
fu you 974	Indica hybrid	Guangxi	2001	6.33	110	88	NA	3.3	82	25.5	NA	NA	NA
ba liang you 353	Indica hybrid	Guangxi	2001	7.203	114	97	NA	3.3	77.5	27	NA	NA	NA
yue you 136	Indica hybrid	Guangxi	2001	6.9525	112	85	NA	3.3	82	25	NA	NA	NA
zhong you gui 55	Indica hybrid	Guangxi	2001	7.2	127	113	NA	2.7	81	28.5	NA	NA	NA
wei you 804	Indica hybrid	Guangxi	2001	6.9975	102	90	19	3.15	80	29.2	NA	NA	NA
jin you 804	Indica hybrid	Guangxi	2001	6.834	100	85	19	2.85	78.3	25	NA	NA	NA
Kyou 619	Indica hybrid	Zhejiang	2001	6.408	113	NA	NA	NA	NA	NA	NA	NA	NA
te you 73	Indica hybrid	Fujian	2001	8.007	NA	120	NA	NA	87.2	29.4	NA	2.7	NA
shan you 161	Indica hybrid	Fujian	2001	6.6585	125	97.5	NA	NA	78	26	NA	2.5	NA
pei liang you 210	Indica hybrid	Hunan	2001	6.5325	122	100	22	3	70	26	140	NA	98
liang you pei jiu	Indica hybrid	Ministry of Agriculture and Rural Affairs of the People¡®s Republic of China	2001	8.6535	150	115	22.8	NA	81	26.2	NA	NA	NA
fei you dong xi 1 hao	Indica hybrid	Ministry of Agriculture and Rural Affairs of the People¡®s Republic of China	2001	8.2905	146.5	107.5	24	NA	85	30	NA	NA	NA
fu you 325	Indica hybrid	Hubei	2001	8.6205	146.1	109	23.1	2.805	88.3	28.1	NA	NA	112.2
Kyou 818	Indica hybrid	Jiangsu	2001	9.231	149	124	NA	NA	81	30.5	NA	2.9	130
bo you 998	Indica hybrid	Guangdong	2001	6.942	116	99	22	2.85	86	22	139	2.8	119.54
bo ¢òyou 15	Indica hybrid	Guangdong	2001	6.675	118	101	22	2.4	81	23	142	NA	115.02
¢òyou 725	Indica hybrid	Ministry of Agriculture and Rural Affairs of the People¡®s Republic of China	2001	8.50605	153	115	26	NA	86	26.4	NA	2.5	NA
jin you 207	Indica hybrid	Guangxi	2001	7.335	119	102	NA	2.85	80	26	120	NA	96
jin you 463	Indica hybrid	Guangxi	2001	7.7505	110	95	22.3	2.7	78	25.1	125	NA	97.5
zhong you 223	Indica hybrid	Guangdong	2001	6.648	129	100	22	3	84	22	135	2.7	113.4
hua you gui 99	Indica hybrid	Ministry of Agriculture and Rural Affairs of the People¡®s Republic of China	2001	7.0185	128.5	102.5	22.5	2.85	85	23	NA	NA	NA
gang you 336	Indica hybrid	Sichuan	2001	8.415	151.5	118	NA	NA	85	27.5	NA	NA	NA
you you 122	Indica hybrid	Shaanxi	2001	8.25	152	100	NA	NA	NA	25.7	NA	2.5	NA
hua you 86	Indica hybrid	Ministry of Agriculture and Rural Affairs of the People¡®s Republic of China	2001	7.017	130	112.5	23	2.625	85	26	NA	NA	NA
xin xiang you 63	Indica hybrid	Guangxi	2001	7.545	130	100	NA	2.85	75	28.5	NA	NA	NA
gang you 725	Indica hybrid	Ministry of Agriculture and Rural Affairs of the People¡®s Republic of China	2001	8.6424	150	115	25	NA	85	26	NA	2.3	NA
Dyou 13	Indica hybrid	Ministry of Agriculture and Rural Affairs of the People¡®s Republic of China	2001	8.178	153	105	25	2.55	83	27.5	NA	NA	NA
Nyou 69	Indica hybrid	Sichuan	2001	8.412	148	110	NA	NA	85	28.5	NA	NA	NA
Tyou 207	Indica hybrid	Guangxi	2001	7.7085	121	109	NA	2.7	80	25.5	NA	NA	NA
liang you pei jiu	Indica hybrid	Hunan	2001	8.3955	141	118	27	2.7	80	26	180	NA	144
zhong 9you 838xuan	Indica hybrid	Ministry of Agriculture and Rural Affairs of the People¡®s Republic of China	2001	6.8238	121	99	22.8	NA	78.8	27.49	105	NA	82.74
yan jing 23 hao	Japonica inbred	Ministry of Agriculture and Rural Affairs of the People¡®s Republic of China	2001	9.1095	147	100	NA	5.085	86.8	26.2	NA	NA	NA
wu you dao 1 hao	Japonica inbred	Jilin	2001	8.5	139	97	NA	NA	NA	25	NA	2	NA
liao you 5218	Japonica hybrid	Liaoning	2001	9.52575	161	117.5	20	3.45	90	26.5	NA	NA	110
liao you 3418	Japonica hybrid	Ministry of Agriculture and Rural Affairs of the People¡®s Republic of China	2001	9.3465	160	108	NA	3.42	81.8	26.4	143.3	NA	117.2194
jing dao 21	Japonica inbred	Ministry of Agriculture and Rural Affairs of the People¡®s Republic of China	2001	7.527	170	106	NA	3.96	88.8	26.1	NA	NA	NA
yongyou 2 hao	Japonica hybrid	Zhejiang	2001	6.5415	134	NA	NA	NA	NA	NA	NA	NA	NA
yue ye zhan 26	Indica inbred	Guangdong	2001	6.9324	128	98.5	20	3	83.5	20	142	2.9	118.57
xi ye zhan 10	Indica inbred	Guangdong	2001	6.8691	134	100	21	3.45	84	17.8	138	3.4	115.92
jing zhen zhan 4 hao	Indica inbred	Guangdong	2001	5.52945	130	97	21	3.15	85	19	NA	NA	NA
zhong dong ruan zhan	Indica inbred	Guangdong	2001	5.93475	128	95	NA	2.85	80	19	140	NA	112
moli xin zhan	Indica inbred	Guangdong	2001	6.15285	126	97	NA	2.85	82	20	140	NA	114.8
feng ba zhan	Indica inbred	Guangdong	2001	5.6493	126	93	20	3	80	21	115	NA	92
te xianzhan 25	Indica inbred	Ministry of Agriculture and Rural Affairs of the People¡®s Republic of China	2001	6.33165	122	95.25	21.25	2.9175	80.6	21.45	142.7	NA	115.0162
zhou 903	Indica inbred	Ministry of Agriculture and Rural Affairs of the People¡®s Republic of China	2001	6.192	110	77.5	NA	5.85	88.5	24	NA	NA	NA
lian jing 3 hao	Japonica inbred	Jiangsu	2001	9.213	150	100	NA	NA	90	27	NA	NA	100
ti you 418	Japonica hybrid	Tianjin	2001	9.114	145	117	22	NA	85	26.2	NA	NA	NA
li dao 1 hao	Japonica inbred	Tianjin	2001	8.8485	170	115	22	NA	90	28	NA	1.73	NA
jin dao 5 hao	Japonica inbred	Tianjin	2001	8.83395	176	110	NA	NA	85	25	133	1.6	113.05
jing xiang 636	Japonica inbred	Beijing	2001	6.75	152.5	105	NA	3.09	81.2	23.4	141	NA	114.4
bao nong 12	Japonica inbred	Hubei	2001	6.462	128	86.6	16.4	NA	77.2	26.1	NA	1.9	NA
70you 9 hao	Japonica hybrid	Ministry of Agriculture and Rural Affairs of the People¡®s Republic of China	2001	6.1371	165.5	96.5	NA	3.525	80	24.75	NA	NA	NA
jin yuan 101	Japonica inbred	Ministry of Agriculture and Rural Affairs of the People¡®s Republic of China	2001	8.943	160	101	NA	NA	90.2	26.2	96	NA	86.592
bao feng 2 hao	Japonica inbred	Ministry of Agriculture and Rural Affairs of the People¡®s Republic of China	2001	9.087	146	98	NA	NA	85	25.4	85.9	NA	73.015
liao you 4418	Japonica hybrid	Ministry of Agriculture and Rural Affairs of the People¡®s Republic of China	2001	10.2375	156	109	NA	NA	80.7	26.6	102	NA	82.314
yu tian 7 hao	Japonica inbred	Ministry of Agriculture and Rural Affairs of the People¡®s Republic of China	2001	9.168	151	96	16	4.5	90	25	NA	1.8	NA
xiang wan xian9 hao	Indica inbred	Hubei	2001	6.285	126	93.9	23.4	NA	81.9	23.1	NA	3.1	NA
fu shi guang	Japonica inbred	Heilongjiang	2001	8.1326	NA	90	18	NA	NA	25.5	NA	1.8	NA
dong zao 14	Indica inbred	Hubei	2001	5.9085	108	90.6	19.9	NA	71.3	25.28	NA	3	NA
jian zhen 2 hao	Indica inbred	Hubei	2001	6.4245	144	104.2	21.5	NA	80.9	23.7	NA	3.1	NA
xiang zao xian32 hao	Indica inbred	Hunan	2001	6.231	106	78	NA	3.75	87.4	26	94	NA	82.156
zhen dao 99	Japonica inbred	Jiangsu	2001	9.543	155	110	NA	NA	81	27.5	NA	NA	100
dong wan 10 hao	Indica inbred	Hubei	2001	5.4855	123	83.9	21.2	NA	79.51	18.14	NA	2.9	NA
xiu shui 42	Japonica inbred	Zhejiang	2001	8.4975	157	NA	NA	NA	NA	NA	NA	NA	NA
dong wan 9 hao	Japonica inbred	Hubei	2001	6.159	124	102.2	17.7	NA	79.7	25.3	NA	1.9	NA
dong wan 11 hao	Japonica inbred	Hubei	2001	6.6645	129	80.5	14.7	NA	75.4	26	NA	1.9	NA
dong zao 13	Indica inbred	Hubei	2001	6.83385	112	83.7	18	4.29	86.3	23.7	80.4	2.8	69.4
tian dong xiang	Indica inbred	Guangxi	2001	7.0425	127.5	107.5	NA	3.225	90	19.2	NA	2.8	NA
xiu shui 52	Japonica inbred	Zhejiang	2001	8.3955	157	NA	NA	NA	NA	NA	NA	NA	NA
jin zao 47	Indica inbred	Zhejiang	2001	6.8205	114	NA	NA	NA	NA	NA	NA	NA	NA
fu zhan	Indica inbred	Guangxi	2001	5.1225	125	103	NA	3	81.4	24.7	NA	3.3	NA
wen 12	Indica inbred	Zhejiang	2001	5.97	116	NA	NA	NA	NA	NA	NA	NA	NA
ji jing 79 hao	Japonica inbred	Jilin	2001	7.7648	135	95	NA	NA	NA	27	NA	1.6	NA
ken dao 9 hao	Japonica inbred	Heilongjiang	2001	7.4153	NA	86.5	16.1	NA	NA	28.1	NA	1.7	NA
hua jing za 2 hao	Japonica hybrid	Hubei	2001	6.2805	126	89.4	19.1	NA	78.1	NA	NA	1.9	NA
dan jing 9 hao	Japonica inbred	Liaoning	2001	7.5	165	115	18.5	NA	NA	26.6	NA	1.8	NA
wu you dao 2 hao	Japonica inbred	Heilongjiang	2001	8.063	NA	85.1	17.3	NA	NA	25.12	NA	1.7	NA
dian xi 4 hao	Japonica inbred	Yunnan	2001	8.289	174	90	20.3	NA	NA	25.1	NA	NA	NA
gui hua zhan	Indica inbred	Guangxi	2001	6.4155	126	105	NA	NA	83	18	NA	3.2	NA
you zhan 8 hao	Indica inbred	Guangxi	2001	6.1905	124	103	NA	3.075	85	16.7	NA	3.1	NA
8you 161	Japonica hybrid	Zhejiang	2001	8.5815	158	NA	NA	NA	NA	NA	NA	NA	NA
gui feng 2 hao	Indica inbred	Guangxi	2001	6.5565	125	105	NA	3	84	19.3	NA	3.2	NA
shen nong 315	Japonica inbred	Liaoning	2001	7.5	152	100	18.5	NA	NA	26	NA	1.7	NA
wu yun jing 11 hao	Japonica inbred	Jiangsu	2001	9.5265	151	100	NA	NA	90	30	NA	NA	110
liang xian3 hao	Indica inbred	Sichuan	2001	9.198	175	105	NA	NA	NA	NA	NA	NA	NA
xiang zao xian33 hao	Indica inbred	Hunan	2001	6.804	108	89	17.7	3.75	85	26	100	2.6	85
gui si zhan	Indica inbred	Guangxi	2001	6.306	125	106	NA	3	82	18.2	NA	3.1	NA
gui feng 6 hao	Indica inbred	Guangxi	2001	6.4875	125	110	NA	3.45	84	17.8	NA	3.9	NA
jia xing 8 hao	Indica inbred	Zhejiang	2001	6.4545	111	NA	NA	NA	NA	NA	NA	NA	NA
jin feng	Japonica inbred	Shanghai	2001	10.2	155	107.5	NA	NA	90	24.5	NA	NA	NA
dong zao 15	Indica inbred	Hubei	2001	6.429	112	89.6	19.2	NA	79.5	22.2	NA	2.5	NA
xiang wan xian13 hao	Indica inbred	Hunan	2001	5.9595	123.7	100	23	2.775	80	28	120	NA	96
zao xiang 1 hao	Indica inbred	Guangxi	2001	6.447	115	98	NA	2.85	75	22	NA	3.2	NA
qing dong xian	Indica inbred	Henan	2001	8.7075	140	105	22	NA	85	25.5	NA	NA	NA
tai yu 14	Indica inbred	Guangxi	2001	7.1385	123	110	22	3	89	20.5	NA	NA	NA
zhen xian96	Indica inbred	Jiangsu	2001	8.946	142	126	NA	NA	90	31	NA	2.9	150
yang dao 8 hao	Indica inbred	Jiangsu	2001	8.7225	149	124	NA	NA	88	32.5	NA	3.1	130
nan jing 38	Japonica inbred	Jiangsu	2001	9.225	155	92.5	NA	NA	83	27	NA	NA	100
yan jing 7 hao	Japonica inbred	Jiangsu	2001	9.8115	155	100	NA	NA	90	28	NA	NA	100
zhen dao 8 hao	Japonica inbred	Jiangsu	2001	9.5085	156	100	NA	NA	90	25	NA	NA	100
nan jing 39	Japonica inbred	Jiangsu	2001	9.1875	157	100	NA	NA	90	26	NA	NA	94
zhen dao 7 hao	Japonica inbred	Jiangsu	2001	9.159	160	95	NA	NA	94	26.5	NA	NA	100
siyou 12	Japonica hybrid	Jiangsu	2001	9.5325	148	105	NA	NA	83	26	NA	NA	140
yan you 1 hao	Japonica hybrid	Jiangsu	2001	9.72	148	105	NA	NA	83	26	NA	NA	140
liao nong 979	Japonica inbred	Liaoning	2001	8.0895	165	102	14.3	NA	NA	26.3	NA	2	NA
liao jing 931	Japonica inbred	Liaoning	2001	9.4755	158	102.5	17	NA	NA	25.2	NA	1.8	NA
liao jing 30	Japonica inbred	Liaoning	2001	9.039	153	97.5	16	NA	NA	27.5	NA	1.8	NA
liao nong 968	Japonica inbred	Liaoning	2001	8.6595	158	NA	14.3	NA	92.3	23.9	NA	NA	NA
tong xi 12 hao	Japonica inbred	Jilin	2001	8.5305	140	110	24.2	NA	86.8	27	NA	1.7	NA
tong yu 120	Japonica inbred	Jilin	2001	8.64	145	110	NA	NA	96	27	NA	1.7	NA
mu dan jiang 25 hao	Japonica inbred	Heilongjiang	2001	7.9642	NA	90	17	NA	NA	25.5	NA	1.6	NA
long dong 102	Japonica inbred	Heilongjiang	2001	7.6694	NA	84	17.5	NA	NA	26.3	NA	1.8	NA
rui ke 26	Indica inbred	Zhejiang	2001	6.5205	113	NA	NA	NA	NA	NA	NA	3	NA
zhe nong 952	Indica inbred	Zhejiang	2001	6.3375	111	NA	NA	NA	NA	NA	NA	NA	NA
dian xi 7 hao	Japonica inbred	Yunnan	2001	9.978	172	97	19.8	NA	NA	23	NA	NA	NA
yin guang	Japonica inbred	Yunnan	2001	8.253	170	90	18.2	NA	NA	26	NA	NA	NA
jing jing 8 hao	Japonica inbred	Yunnan	2001	8.061	182.5	107.5	20	NA	82.5	25	NA	NA	NA
feng dao 14 hao	Japonica inbred	Yunnan	2001	8.0685	185	90	18.5	NA	80	24.5	NA	1.73	NA
hong you 1 hao	Indica inbred	Yunnan	2001	6.7575	150	95	22.7	NA	85.3	33	NA	3	93.4
dian c hao 1 hao	Indica inbred	Yunnan	2001	7.6005	167.5	107.5	23.5	NA	78	NA	NA	NA	NA
dian c hao 3 hao	Indica inbred	Yunnan	2001	9	162.5	105	21	NA	85	36.5	NA	NA	NA
yun hui 290	Indica inbred	Yunnan	2001	7.0875	167.5	102.5	NA	NA	NA	NA	NA	NA	NA
yan feng 47	Japonica inbred	Liaoning	2001	9.258	160	96	14.9	NA	NA	27.5	NA	1.6	NA
xiang wan xian12 hao	Indica inbred	Hunan	2001	6.4275	114	97	NA	3.3	86	26	98	NA	84.28
jin yuan 45	Japonica inbred	Tianjin	2001	7.7076	176	107.5	23.5	NA	NA	27	NA	1.8	NA
yang dao 6 hao	Indica inbred	Ministry of Agriculture and Rural Affairs of the People¡®s Republic of China	2001	9.2115	139.5	115	24	NA	90	30	NA	NA	NA
ji jing 83 hao	Japonica inbred	Jilin	2002	7.509	141	105	21	NA	96	26	NA	NA	NA
ken dao 10 hao	Japonica inbred	Heilongjiang	2002	7.0416	NA	93.9	17.2	NA	NA	26.2	NA	NA	NA
ba you 8 hao	Japonica hybrid	Zhejiang	2002	6.5232	136.4	NA	NA	3.135	80	25.7	114.3	NA	91.4
hua yu 560	Japonica inbred	Tianjin	2002	9.333	146	NA	21	NA	97	28	NA	NA	NA
liao jing 92-34	Japonica inbred	Liaoning	2002	8.496	156	97.5	16.5	NA	NA	23	NA	1.7	NA
chang you 1 hao	Japonica hybrid	Jiangsu	2002	8.916	165.5	120	NA	2.775	80	27	NA	NA	135
yongyou 3 hao	Japonica hybrid	Zhejiang	2002	6.83925	135.9	NA	NA	2.76	84.7	29.8	106	NA	89.8
xiang wan xian10 hao	Indica inbred	Hubei	2002	6.7911	120.6	95.7	21.1	3.45	80.2	27.93	92.8	3.1	74.4
zhong xuan 181	Indica inbred	Zhejiang	2002	7.443	109	NA	NA	NA	82.1	28.6	NA	NA	NA
xiu shui 13	Japonica inbred	Hubei	2002	7.1583	130	79	14	4.155	80.7	25.08	85	1.9	68.7
ning jing 23 hao	Japonica inbred	Ningxia	2002	12.168	152.5	100	NA	NA	85	26	NA	1.7	100
jia yu 164	Indica inbred	Zhejiang	2002	6.771	110	NA	NA	NA	79.9	27.1	NA	NA	NA
¢òyou 602	Indica hybrid	Sichuan	2002	8.721	154	116	NA	NA	85	28.5	NA	NA	NA
jin you 18	Indica hybrid	Guizhou	2002	7.452	151.6	100.4	NA	NA	NA	28.2	NA	3	NA
Dyou 363	Indica hybrid	Sichuan	2002	8.6484	153.3	116.7	24.9	2.6145	79.8	25.9	NA	NA	NA
¢òyou 7954	Indica hybrid	Zhejiang	2002	7.1715	133	NA	NA	2.4795	82.86	26.8	NA	NA	130.1
xie you 80	Indica hybrid	Jiangxi	2002	6.7347	116.3	91.8	NA	3.1995	86.35	27.86	92.06	3	79.49381
feng you 9 hao	Indica hybrid	Hunan	2002	6.612	113	95	21	NA	80	29	110	3	88
pei liang you 210	Indica hybrid	Jiangxi	2002	6.6339	123	94.8	NA	2.9745	76.38	25.71	115.02	3.2	87.852276
Tyou 5537	Indica hybrid	Fujian	2002	5.9655	129	97.5	23	2.7	82.5	28.5	NA	2.5	NA
Dqi bao you 1 hao	Indica hybrid	Fujian	2002	5.718	NA	NA	22.5	NA	82.5	28.5	NA	3.1	NA
liang you 932	Indica hybrid	Hubei	2002	8.94765	135.3	118.2	23.5	3.015	80	25.25	151.6	2.9	121
gang you 725	Indica hybrid	Hubei	2002	9.00105	135.6	125.3	26.1	2.52	82.3	27.96	172.4	2.4	141.8
fu you 151	Indica hybrid	Sichuan	2002	8.33145	152.2	114.6	NA	NA	81.2	27.6	NA	NA	NA
nong you 90	Indica hybrid	Fujian	2002	7.17255	128	100	NA	3.3	87.5	29	NA	2.5	NA
pei liang you 93	Indica hybrid	Hunan	2002	9.1905	132	106	NA	NA	78	23.3	NA	3.1	NA
jing chu you 148	Indica hybrid	Hubei	2002	7.5945	117.2	96.3	22.6	3.3	81.9	25.94	121.9	3.1	99.8
Dyou 162	Indica hybrid	Shaanxi	2002	8.25	140	90	21.79	3	86	28.45	130	NA	110
chang you 838	Indica hybrid	Sichuan	2002	7.82265	147.6	105	24	2.43	82	28.7	NA	NA	NA
Kyou 130	Indica hybrid	Shaanxi	2002	9.75	154	110	25	2.85	80	30	NA	2.6	123
gang you 361	Indica hybrid	Sichuan	2002	7.4685	153.8	88	NA	2.652	79.2	25.63	NA	NA	NA
Cyou 2040	Indica hybrid	Sichuan	2002	8.4075	148	126	24.8	2.16	78.8	28	NA	NA	NA
shan you lian he 2 hao	Indica hybrid	Guizhou	2002	8.889	149.7	100	NA	2.445	85	27.5	NA	NA	154
jin you 207	Indica hybrid	Hubei	2002	7.416	118.2	95.2	22.6	3.21	82.4	26.36	120.6	3.1	99.4
jin you 402	Indica hybrid	Hubei	2002	7.09035	114	86.5	20.6	3.975	73.7	26.45	107.4	3.2	79.2
xie you 218	Indica hybrid	Jiangxi	2002	6.79695	NA	92.3	NA	2.805	85	33	86	2.7	73.1
hua you 229	Indica hybrid	Guangdong	2002	6.57	113	104	21	2.775	81.4	25	137	NA	111.518
zhong you 229	Indica hybrid	Guangdong	2002	7.5585	127	104	22	3	84.7	25.4	126	NA	106.722
hua you 8830	Indica hybrid	Guangdong	2002	6.3435	125	100	22	3	82.95	23	134	2.7	111.153
hua you 63	Indica hybrid	Guangdong	2002	7.7475	130	114	24	2.85	85.8	24.9	132	2.6	113.256
hua you 8813	Indica hybrid	Guangdong	2002	7.2075	123	96	21	3	84.7	22.7	135	2.5	114.345
hua you 128	Indica hybrid	Guangdong	2002	6.735	115	105.7	21	3	80	22.4	139	2.6	111.2
te you 721	Indica hybrid	Guangdong	2002	7.8615	130	110	23	2.55	84.05	29	142	NA	119.351
shan you 998	Indica hybrid	Guangdong	2002	6.5955	112	99	22	2.7	86	24.5	133	2.6	114.38
pei za 620	Indica hybrid	Guangdong	2002	7.2375	128	105	23	2.55	78.6	25.4	155	NA	121.83
jin you 223	Indica hybrid	Guangdong	2002	6.7725	130	102	22	3	87.3	21.8	130	NA	113.49
nong you 90	Indica hybrid	Jiangxi	2002	6.2553	112.4	93.3	NA	3.0345	88.4	31.2	79.19	2.6	70.00396
xie you 963	Indica hybrid	Jiangxi	2002	7.05585	125.3	92	NA	3.4755	79.93	29.13	88.08	2.8	70.402344
te you 86	Indica hybrid	Fujian	2002	7.0785	127	108	NA	NA	85	28	NA	2.3	NA
jin you 404	Indica hybrid	Guizhou	2002	8.5425	144.5	101	NA	2.28	75.5	27.4	NA	NA	NA
shan you 084	Indica hybrid	Jiangsu	2002	8.6694	144.5	120	NA	2.4	82	28.5	NA	2.4	135
liang you 273	Indica hybrid	Hubei	2002	8.2422	133.5	125.4	26.8	2.73	77.4	28.89	147.6	3.1	114.6
Kyou 66	Indica hybrid	Jiangxi	2002	6.3069	116.3	89.6	NA	3.6015	83.96	20.47	75.71	2.9	63.57
jin you 152	Indica hybrid	Hubei	2002	6.89865	116	82.1	20.8	3.75	71.4	25.4	115.7	3.3	82.6
xin xiang you 63	Indica hybrid	Guizhou	2002	7.6755	162.8	105	NA	2.55	75	28	NA	NA	140
¢òyou D069	Indica hybrid	Sichuan	2002	8.4462	155	115	25	NA	80	28	NA	NA	NA
¢òyou 1577	Indica hybrid	Sichuan	2002	8.4612	155.4	115.3	25.2	2.4945	81.5	25	NA	NA	NA
jin you 752	Indica hybrid	Jiangxi	2002	6.5856	140	118	NA	1.803	76.83	27.24	175.75	3.1	135.028725
xin xiang you 96	Indica hybrid	Hubei	2002	6.51375	122	94.3	21.7	3.195	79.2	26.66	121.8	3	96.5
fei you 99-14	Indica hybrid	Sichuan	2002	8.3682	151	111	25	NA	82	29.4	NA	NA	NA
Nyou 92-4	Indica hybrid	Sichuan	2002	8.41725	153.8	116.8	24.9	2.625	90	29.3	NA	NA	NA
fu you 994	Indica hybrid	Sichuan	2002	8.4972	153.5	112.7	25.4	NA	89.9	27.8	NA	NA	NA
¢òyou 9 hao	Indica hybrid	Sichuan	2002	13.59	151	125	NA	NA	81.5	28	NA	NA	NA
fu you 19	Indica hybrid	Sichuan	2002	8.27235	NA	116.5	25.2	2.4	80.7	26.3	NA	NA	NA
Cyou 2009	Indica hybrid	Sichuan	2002	8.3142	151	118	26.2	2.475	81	30.8	NA	NA	NA
mian 2you 151	Indica hybrid	Sichuan	2002	8.38815	152	114.9	24.5	2.475	80	28.7	NA	3.2	NA
chuan 7you 89	Indica hybrid	Sichuan	2002	8.7465	153	119	26.1	2.25	80	31.1	NA	NA	NA
zhu liang you 83	Indica hybrid	Hunan	2002	7.65	109	90	19	NA	80	27.85	NA	NA	NA
zhu liang you 176	Indica hybrid	Hunan	2002	7.47	108	95	20	NA	88	27.2	NA	2.8	NA
jin you F6	Indica hybrid	Jiangxi	2002	6.9882	115.9	92.01	NA	3.2445	76.59	25.06	101.36	3.2	77.64
xie you 982	Indica hybrid	Zhejiang	2002	7.37475	129.5	NA	NA	3.06	85.3	28.5	106.5	NA	90.8
xie you 962	Indica hybrid	Jiangxi	2002	6.65925	124	97	NA	3.0585	81.7	28.32	91.4	2.9	74.6738
pei liang you 559	Indica hybrid	Hunan	2002	9.597	135	112.5	NA	2.85	80	24	NA	NA	NA
¢òyou 441	Indica hybrid	Hunan	2002	9.273	144	111.5	26.5	NA	93	27.7	NA	2.5	NA
jin you 44	Indica hybrid	Hunan	2002	7.248	110	97	24.3	3.3525	83	28	110	3.5	91.3
Kyou 507	Indica hybrid	Jiangsu	2002	9.27495	146	115	NA	2.7	83	NA	NA	2.9	145
¢òyou 559	Indica hybrid	Jiangsu	2002	9.2586	151.5	125	NA	2.25	86	27	NA	2.2	190
te you 37	Indica hybrid	Zhejiang	2002	7.06935	129.8	NA	NA	2.625	83.7	26.9	125.9	NA	105.4
shan you 8548	Indica hybrid	Zhejiang	2002	7.116	126.7	NA	NA	2.955	88.1	28.6	109.8	NA	96.7
jiu liang you feng	Indica hybrid	Jiangxi	2002	7.2396	112.8	85.17	NA	3.192	78.22	23.96	109.63	3.1	85.76
jiu liang you F6	Indica hybrid	Jiangxi	2002	5.9859	118	90.41	NA	3.972	74.46	27.01	82.85	3.1	61.69
gan ya 1 hao	Indica hybrid	Jiangxi	2002	6.09285	153.5	121	NA	2.184	69.64	20.32	174.22	2.6	121.326808
jin you 1176	Indica hybrid	Hubei	2002	6.84945	114.5	86.4	20.3	3.57	70.3	26.58	114.5	3.3	80.5
jin you 133	Indica hybrid	Hubei	2002	6.9885	123.8	94	23.2	3.045	63	28.35	146.1	3.3	92
Kyou 2020	Indica hybrid	Guizhou	2002	8.9445	153	95	20	3.0975	75	29.5	NA	NA	NA
Kyou 467	Indica hybrid	Guizhou	2002	8.463	150.9	94.6	NA	2.6475	78	26.8	NA	NA	97.4
jin you 467	Indica hybrid	Guizhou	2002	8.886	145.3	108.2	NA	2.88	78.9	26.8	NA	NA	NA
qian you 18	Indica hybrid	Guizhou	2002	8.052	164.2	97.9	NA	2.325	80	26.9	NA	NA	157.6
jin you hong	Indica hybrid	Guizhou	2002	8.127	152.5	90.7	NA	2.625	82.8	24.6	NA	NA	NA
gang you 363	Indica hybrid	Sichuan	2002	7.8261	NA	NA	25	NA	NA	NA	NA	NA	NA
qiu you 998	Indica hybrid	Guangdong	2002	6.609	119	106	23	3.3	80	19.7	134	3.1	107.2
mian 2you 838	Indica hybrid	Hubei	2002	9.0267	133	118	25.3	2.7	82.5	30.82	138.5	2.8	114.3
jin you 527	Indica hybrid	Sichuan	2002	8.4	155.6	114	NA	NA	80	29	NA	NA	NA
Dyou 128	Indica hybrid	Sichuan	2002	8.5605	153.9	114.2	NA	2.589	79.2	24.4	NA	NA	NA
¢òyou 718	Indica hybrid	Hubei	2002	8.95335	137.3	124.3	25	2.535	87.9	30.39	141.7	2.3	124.5
zhong you 2 hao	Indica hybrid	Sichuan	2002	8.37975	151	117	25.4	2.55	81	25.4	NA	NA	NA
Kyou 8602	Indica hybrid	Sichuan	2002	8.5413	149.6	109.9	23.7	NA	80.5	31	NA	NA	NA
Kyou 117	Indica hybrid	Zhejiang	2002	7.752	127.2	NA	NA	2.7075	87.97	27.6	136.6	NA	120.2
lu liang you 106	Indica hybrid	Guizhou	2002	7.6395	159	113.4	NA	NA	87.3	27.4	NA	NA	NA
Kyou 877	Indica hybrid	Sichuan	2002	7.0125	151	85.5	NA	2.475	80	28.5	NA	NA	NA
zhu liang you 02	Indica hybrid	Hunan	2002	7.647	111	92	NA	3.45	87	26.7	100	3.1	87
chuan xiang you 2 hao	Indica hybrid	Sichuan	2002	8.0565	155	114.2	25	NA	79.9	28.14	NA	NA	NA
Dyou 527	Indica hybrid	Fujian	2002	8.29275	147.3	100	NA	NA	85	29	145	3	123.25
Tyou 207	Indica hybrid	Guizhou	2002	7.0665	153.8	97.5	NA	3	NA	26	130	NA	NA
jin you 725	Indica hybrid	Sichuan	2002	8.2365	149.4	112.1	26.5	2.3565	79.3	27.5	NA	NA	NA
Byou 827	Indica hybrid	Sichuan	2002	8.523	105.3	118.9	NA	NA	82.2	NA	NA	NA	NA
hong lian you 6 hao	Indica hybrid	Hubei	2002	8.6607	139	118.9	23.8	2.97	83.5	27.21	156.7	3.1	130.9
chuan feng 6 hao	Indica hybrid	Sichuan	2002	8.193	150.6	120.5	NA	NA	76.3	27.53	NA	NA	NA
jin you 725	Indica hybrid	Hubei	2002	8.82465	133.8	114	26.3	NA	80.25	27.5	NA	NA	NA
feng you xiang zhan	Indica hybrid	Jiangsu	2002	9.1245	143	130	NA	2.25	88	28	NA	3.2	180
tong 95-74	Japonica inbred	Jilin	2002	8.223	135	110	18	NA	90	25	NA	NA	NA
xiu shui 110	Japonica inbred	Zhejiang	2002	8.385	157	NA	NA	3.435	86.4	25	123.5	NA	106.7
xiang zao xian31 hao	Indica inbred	Jiangxi	2002	6.3246	110	79	NA	4.35	85.48	23.18	65	3.1	55.71
zhong jian 99-38	Indica inbred	Hunan	2002	7.035	107	87	20	NA	82	25.6	NA	3.1	NA
zhong zao 16	Indica inbred	Jiangxi	2002	6.47685	111.5	82.96	NA	3.3405	77.57	21.82	96.01	3.2	74.48
zhong 98-15	Indica inbred	Hunan	2002	7.2	105	84	17.5	NA	80.7	25.5	106.6	3.1	86.0262
zhong 98-19	Indica inbred	Jiangxi	2002	6.6768	110.3	82.65	NA	3.318	87.31	23.78	88.98	3.1	77.69
zhong 98-18	Indica inbred	Zhejiang	2002	6.681	109	NA	NA	NA	81	22.8	NA	NA	NA
xiang feng zao 1 hao	Indica inbred	Hunan	2002	7.185	107	90	NA	NA	89	25	NA	NA	NA
ye xianzhan 6 hao	Indica inbred	Guangdong	2002	6.24615	113	100	20	2.85	83	21	134	NA	111.22
jin jing za 4 hao	Japonica hybrid	Tianjin	2002	9.066	175	115	20	2.7	85	26	NA	NA	NA
jin xing 4 hao	Japonica inbred	Tianjin	2002	8.1945	170	NA	17	NA	NA	26.5	NA	1.7	NA
jin dao 937	Japonica inbred	Tianjin	2002	9.288	175	120	18	NA	90	25	NA	1.89	NA
jin ning 901	Japonica inbred	Tianjin	2002	9.3885	165	102.5	NA	NA	NA	NA	NA	NA	NA
jing dao 24	Japonica inbred	Beijing	2002	8.2965	155	110	20	2.925	87.2	25.5	NA	2.35	NA
zhong jin 2 hao	Japonica inbred	Beijing	2002	8.028	170	103	20	NA	86.4	24.3	NA	NA	NA
zu pei 126	Japonica inbred	Beijing	2002	7.81875	170	100	21.8	NA	86.7	24	NA	NA	NA
jia zao 935	Indica inbred	Hunan	2002	7.365	106	82	NA	NA	82.5	26.5	NA	3.1	NA
xiang wan xian11 hao	Indica inbred	Jiangxi	2002	5.3487	NA	91.8	NA	2.829	79.66	24.92	107.12	3.2	85.331792
mu dan jiang 20 hao	Japonica inbred	Ningxia	2002	10.9005	135	90	18	NA	NA	25.8	NA	1.7	95.8
dong zhong 4 hao	Indica inbred	Hubei	2002	8.18385	135.3	122	25.2	3.12	84.1	21.93	152.3	3.1	128.1
jia yu 164	Indica inbred	Hubei	2002	6.9303	108.2	75.7	19.2	4.185	81	27.2	89.3	3.1	72.3
shen you 1 hao	Japonica hybrid	Shanghai	2002	9.8475	152.5	107.5	NA	NA	NA	27	NA	NA	NA
hua jing xian74	Indica inbred	Jiangxi	2002	5.9187	128.6	89	NA	2.925	78.3	20.44	118	2.7	92.394
ning jing 27 hao	Japonica inbred	Ningxia	2002	10.251	152.5	86	NA	NA	86	22	NA	2	NA
zhe jing 20	Japonica inbred	Zhejiang	2002	6.79575	127.4	NA	NA	3.6255	92.1	25.2	82	NA	75.5
fu yuan 4 hao	Japonica inbred	Ningxia	2002	12.141	142	99.8	NA	NA	92.81	24.2	NA	NA	72.4
tong yin 58 hao	Japonica inbred	Jilin	2002	8.7023	139	115	23.2	NA	88.5	29.2	NA	NA	NA
dong xiang 1 hao	Indica inbred	Hubei	2002	6.3717	129.8	116.8	24.3	3.63	66.7	27.92	118.8	3.3	79.2
guang ling xiang jing	Japonica inbred	Jiangsu	2002	9.0945	153	100	NA	3.3	91	26.5	NA	NA	100
jia yu 202	Indica inbred	Hubei	2002	6.81135	106.8	73.2	18.3	4.335	79.7	25.32	95.2	3.3	75.9
feng xuan 3 hao	Japonica inbred	Jilin	2002	7.8	136	103	NA	NA	NA	27.5	NA	NA	NA
hua jing 1 hao	Japonica inbred	Jiangsu	2002	9.123	154.5	110	NA	3.3	91	30	NA	NA	110
dong nong 422	Japonica inbred	Heilongjiang	2002	7.8167	NA	86.5	19.5	NA	NA	27	NA	1.76	NA
xiu shui 59	Japonica inbred	Shanghai	2002	9.405	150	105	NA	3.75	90	24.5	NA	NA	NA
liu you 8 hao	Japonica hybrid	Jiangsu	2002	9.255	151	110	NA	2.565	75	27	NA	NA	138
chang bai 10 hao	Japonica inbred	Jilin	2002	8.052	130	97.5	NA	NA	90	27.5	NA	NA	NA
ning jing 24 hao	Japonica inbred	Ningxia	2002	8.931	147	95	NA	NA	NA	27	NA	2.1	90
ken jian dao 6 hao	Japonica inbred	Heilongjiang	2002	8	NA	75	15.6	NA	NA	26.7	NA	NA	NA
gan zao xian50 hao	Indica inbred	Jiangxi	2002	6.41745	113.1	85.24	NA	3.0015	81.29	26.27	97.55	2.2	79.3
dong zao 16	Indica inbred	Hubei	2002	5.67105	111.6	77.8	16.9	5.49	75.6	23.79	63	3.5	47.6
chang nong jing 3 hao	Japonica inbred	Jiangsu	2002	10.3173	162.5	112	NA	2.625	92	27	NA	NA	143
ji jing 81 hao	Japonica inbred	Jilin	2002	7.6675	145	95	23	NA	90	26	NA	NA	NA
tong yu 313	Japonica inbred	Jilin	2002	7.773	130	105	23	NA	95	30	NA	NA	NA
bei dao 2 hao	Japonica inbred	Heilongjiang	2002	7.3455	NA	90	19	NA	NA	26.5	NA	1.8	NA
gan zao xian51 hao	Indica inbred	Jiangxi	2002	6.24	110.8	74.58	NA	NA	78.97	21.43	96.24	3.1	76.01
xiang you 61	Indica inbred	Sichuan	2002	12.39	151.6	125.3	23.7	NA	90.5	25.5	NA	NA	NA
ning jing 26 hao	Japonica inbred	Ningxia	2002	10.5	147	88.8	NA	NA	86.1	22.6	58.6	NA	50.5
chang zao xian10 hao	Indica inbred	Hunan	2002	6.5655	110	87	NA	NA	NA	27	NA	NA	NA
su hu xiang jing	Japonica inbred	Shanghai	2002	9.135	NA	95	16	NA	90	26.5	NA	NA	NA
bao nong 14	Japonica inbred	Shanghai	2002	8.931	150.5	98.3	NA	3	NA	26.7	NA	NA	110
pu you 801	Japonica hybrid	Shanghai	2002	9	140	100	NA	3.3	NA	26	130	NA	NA
minyou 55	Japonica hybrid	Shanghai	2002	9.09	150	100	17.5	2.925	90	27.5	140	NA	126
you zhi 8 hao	Japonica inbred	Hebei	2002	7.8	165	110	17.5	NA	NA	26	NA	NA	NA
ken yu 8 hao	Japonica inbred	Hebei	2002	8.274	167.5	105	17	NA	NA	26	NA	NA	NA
ken you 2000	Japonica inbred	Hebei	2002	7.6425	170	105	NA	NA	NA	25	NA	NA	NA
tie jing 6 hao	Japonica inbred	Liaoning	2002	7.8495	148	87.5	17	NA	NA	26.6	NA	1.7	NA
liao nong 9911	Japonica inbred	Liaoning	2002	8.79	155	100	17.17	NA	NA	25.7	NA	1.8	NA
liao jing 534	Japonica inbred	Liaoning	2002	8.457	155.5	115	20	NA	NA	26	NA	1.9	NA
hua jing 15	Japonica inbred	Liaoning	2002	8.9925	154	98.1	15.8	NA	NA	21.6	NA	1.6	NA
jiu dao 29 hao	Japonica inbred	Jilin	2002	7.3224	133	98	18	NA	NA	26	NA	NA	NA
yan jing 24 hao	Japonica inbred	Jilin	2002	7.507	133	96.5	18.1	NA	NA	26	NA	NA	NA
chang bai 12 hao	Japonica inbred	Jilin	2002	8.2336	132	106	23	NA	96	28	NA	NA	NA
chang bai 13 hao	Japonica inbred	Jilin	2002	8.376	132	96	23	NA	93	27	NA	NA	NA
chang xuan 10 hao	Japonica inbred	Jilin	2002	8.2905	132	96	18.5	NA	NA	27	NA	NA	NA
chang bai 11 hao	Japonica inbred	Jilin	2002	8.169	133	97.5	NA	NA	90	28	NA	NA	NA
jiu dao 30 hao	Japonica inbred	Jilin	2002	7.987	135	90	18	NA	90	26.7	NA	NA	NA
tong yu 316	Japonica inbred	Jilin	2002	8.0535	135	100	24	NA	95	26	NA	NA	NA
ji jing 82 hao	Japonica inbred	Jilin	2002	8.418	136	98	20	NA	90	28	NA	NA	NA
ji jing 80 hao	Japonica inbred	Jilin	2002	3.33825	137	97.5	NA	NA	NA	27.7	NA	NA	NA
tong xi 9 hao	Japonica inbred	Jilin	2002	7.947	136	97.5	NA	NA	NA	27.5	NA	NA	NA
jiu dao 31 hao	Japonica inbred	Jilin	2002	8.7539	138	96	20	NA	90	29	NA	NA	NA
jiu dao 32 hao	Japonica inbred	Jilin	2002	8.5907	140	103	19.6	NA	90	29	NA	NA	NA
ji nong da 13 hao	Japonica inbred	Jilin	2002	8.4225	138	105	22	NA	90	26	NA	NA	NA
tong yu 207	Japonica inbred	Jilin	2002	8.3475	143	110	23	NA	92.5	28	NA	NA	NA
jiu dao 33 hao	Japonica inbred	Jilin	2002	8.1563	146	104	19	NA	85	25	NA	NA	NA
jiu dao 34 hao	Japonica inbred	Jilin	2002	8.8406	146	115	20.9	NA	90	26.3	NA	NA	NA
wen yu 302	Japonica inbred	Jilin	2002	8.75	142	95	20	NA	95	28	NA	NA	NA
song jing 5 hao	Japonica inbred	Heilongjiang	2002	8.8678	NA	92.3	14.8	NA	NA	25.8	NA	1.5	NA
long jing 11 hao	Japonica inbred	Heilongjiang	2002	7.9517	NA	87.5	NA	NA	NA	27	NA	1.7	NA
long dong 103	Japonica inbred	Heilongjiang	2002	7.0308	NA	77.5	17	NA	NA	27.3	NA	1.8	NA
long dao 2 hao	Japonica inbred	Heilongjiang	2002	7.1742	NA	80	14.6	NA	NA	28	NA	NA	NA
shang yu 418	Japonica inbred	Heilongjiang	2002	7.6854	NA	85	16.6	NA	NA	26.2	NA	1.7	NA
yan dao 6 hao	Japonica inbred	Jiangsu	2002	9.477	155	100	NA	3	90	27.5	NA	NA	110
nan jing 40	Japonica inbred	Jiangsu	2002	9.1605	153.5	100	NA	3.45	88	27.5	NA	NA	100
su xiang jing 2 hao	Japonica inbred	Jiangsu	2002	8.5638	164.5	115	NA	3	NA	NA	NA	NA	NA
gan zao xian52 hao	Indica inbred	Jiangxi	2002	6.43155	108.4	75.53	NA	3.4215	83.75	25.21	90.13	3.2	75.49
gan wan xian31 hao	Indica inbred	Jiangxi	2002	5.47365	125	85	NA	3.3705	75.4	27.41	85.2	3.3	64.2408
bi jing 40 hao	Japonica inbred	Guizhou	2002	6.465	169	102.5	NA	3	82.15	28	NA	NA	NA
86you 242	Japonica hybrid	Jiangsu	2002	8.1375	167	115	NA	2.4	88	25	NA	NA	145
jia zao 08	Indica inbred	Zhejiang	2002	6.7245	113	NA	NA	NA	80	25.5	NA	NA	NA
song jing 6 hao	Japonica inbred	Heilongjiang	2002	8.0319	NA	97.5	16.9	NA	NA	26.5	NA	1.9	NA
feng hua zhan	Indica inbred	Guangdong	2002	6.9867	128	97	21	3.3	81.9	21	124	3.5	101.556
dong zao 18	Indica inbred	Hubei	2003	6.8841	115.5	86.8	20.2	4.095	79.5	25.34	NA	NA	77.8
xiang wan xian12 hao	Indica inbred	Ministry of Agriculture and Rural Affairs of the People¡®s Republic of China	2003	6.7965	117.2	95.7	22	3.3	86.4	24.9	102.2	3.3	88.3008
jiu dao 41 hao	Japonica inbred	Jilin	2003	7.509	NA	NA	NA	NA	NA	NA	NA	NA	NA
jin yuan 45	Japonica inbred	Ministry of Agriculture and Rural Affairs of the People¡®s Republic of China	2003	8.334	178.8	115.4	NA	NA	84.7	24.75	132.6	NA	112.3122
liang you pei jing	Japonica hybrid	Ministry of Agriculture and Rural Affairs of the People¡®s Republic of China	2003	8.505	164.2	118.4	NA	NA	83.6	24.2	173.6	NA	145.1296
jia zao 312	Indica inbred	Zhejiang	2003	7.25085	109.45	NA	NA	3.162	75.23	25.75	NA	NA	91
liao jing 9 hao	Japonica inbred	Liaoning	2003	9.0435	160	105	16.5	NA	NA	25.6	NA	NA	NA
wu xiang jing 14 hao	Japonica inbred	Jiangsu	2003	9.21945	156	100	NA	2.85	91	26	NA	NA	130
jia hua 1 hao	Japonica inbred	Shanghai	2003	9.477	152	NA	NA	3.3	90	25.5	NA	NA	NA
zhong zao 21	Indica inbred	Zhejiang	2003	6.8295	111.7	NA	NA	3.105	78.5	20.1	NA	NA	110.1
jia 991	Japonica inbred	Zhejiang	2003	8.058	NA	NA	NA	3.495	89.3	26.8	NA	NA	NA
jin dao 9618	Japonica inbred	Tianjin	2003	8.7225	168	95	19	NA	90	25.5	98	NA	88.2
yan jing 68	Japonica inbred	Liaoning	2003	9.321	159	100	16	NA	NA	24.1	NA	NA	NA
xie you 336	Indica hybrid	Guizhou	2003	8.175	152.5	100.2	NA	2.685	NA	27.3	NA	NA	NA
xie you 9019	Indica hybrid	Anhui	2003	9.0645	NA	NA	NA	NA	85	28.5	NA	NA	NA
qiu you 998	Indica hybrid	Guangxi	2003	7.7985	122	100	NA	3.3	85	20.4	140	3.1	119
hong you 527	Indica hybrid	Sichuan	2003	8.70645	150.3	108.6	25.4	2.4	82.1	31.4	NA	2.9	NA
xie you 5968	Indica hybrid	Zhejiang	2003	8.076	NA	NA	NA	2.4225	88.8	29	143.5	NA	127.428
feng you 559	Indica hybrid	Jiangsu	2003	9.5262	146	123	NA	2.55	88	26	NA	2.7	155
guo dao 2 hao	Indica hybrid	Jiangxi	2003	7.36845	121.3	102.07	NA	2.4855	78.84	29.74	117.7	2.8	92.8
fei you dong xi 1 hao	Indica hybrid	Ministry of Agriculture and Rural Affairs of the People¡®s Republic of China	2003	7.956	124.4	108.9	24.6	2.865	84.4	29.8	126.1	3.1	106.4284
you you 998	Indica hybrid	Ministry of Agriculture and Rural Affairs of the People¡®s Republic of China	2003	7.4085	119.6	102.9	21.1	3	83.7	25.3	135.3	2.8	113.2461
¢òyou 58	Indica hybrid	Hunan	2003	8.25	142	120	NA	NA	84	26.4	NA	2.4	NA
fu you 325	Indica hybrid	Ministry of Agriculture and Rural Affairs of the People¡®s Republic of China	2003	9.3	150.5	112.2	24.7	2.655	86.7	27.9	153.7	2.5	133.2579
¢òyou 527	Indica hybrid	Ministry of Agriculture and Rural Affairs of the People¡®s Republic of China	2003	9.447	153	115.9	24.5	2.505	84.5	29.3	162.1	2.6	136.9745
xian nong 16 hao	Indica hybrid	Jiangxi	2003	7.4097	124.5	92.31	NA	3.039	73.53	24.78	125.34	2.6	92.17
Kyou 818	Indica hybrid	Ministry of Agriculture and Rural Affairs of the People¡®s Republic of China	2003	9.9	137.5	123.8	24.2	2.85	80.5	30.4	145.1	2.9	116.8055
yi xiang you 1577	Indica hybrid	Jiangxi	2003	7.33035	127.5	115.58	NA	2.322	82.21	27.24	138.46	2.7	113.83
zhong you 177	Indica hybrid	Ministry of Agriculture and Rural Affairs of the People¡®s Republic of China	2003	8.8785	151.2	108.1	25.3	2.595	81.7	27.3	157.9	3.1	129.0043
bo you 998	Indica hybrid	Ministry of Agriculture and Rural Affairs of the People¡®s Republic of China	2003	7.404	114.9	104.9	22.7	2.97	86.7	21.2	137.1	2.8	118.8657
bo ¢òyou 15	Indica hybrid	Hainan	2003	6.633	112.7	104	21.9	2.274	82.6	23.4	140.2	NA	115.8052
gang you 527	Indica hybrid	Ministry of Agriculture and Rural Affairs of the People¡®s Republic of China	2003	9.3408	147.5	118.7	25.5	2.355	82	30	169.7	2.6	139.154
Dyou 527	Indica hybrid	Ministry of Agriculture and Rural Affairs of the People¡®s Republic of China	2003	8.5743	153.1	114.1	25.4	2.64	78.8	29.7	154.6	3.2	121.8248
jin you 463	Indica hybrid	Jiangxi	2003	7.1904	113.9	91.7	NA	3.66	74.1	26.5	106.5	3.1	78.8
pei liang you ci 4	Indica hybrid	Hunan	2003	8.6625	144	110	25	NA	76.1	22.6	NA	2.8	NA
hua you 107	Indica hybrid	Guangxi	2003	6.7605	122	105	NA	2.85	82.6	21.9	127.5	2.6	105.315
feng you si miao	Indica hybrid	Guangdong	2003	6.288	126	NA	NA	NA	77.25	23.4	131.5	3.2	101.58375
Dyou 130	Indica hybrid	Sichuan	2003	8.4945	154.9	114.3	25.8	NA	77	28.2	NA	NA	NA
¢òyou fu 819	Indica hybrid	Fujian	2003	6.77895	129	100	23	NA	82.5	26	145	NA	119.625
¢òyou 129	Indica hybrid	Fujian	2003	6.7308	129	100	23	NA	85	27	145	NA	123.25
Tyou 5570	Indica hybrid	Fujian	2003	6.1413	130	97.5	23	NA	78	26.5	135	NA	105.3
liang you 1193	Indica hybrid	Hubei	2003	8.99055	134.7	117	25.4	2.805	84.4	29.08	141.2	3	118.9
biao you 2 hao	Indica hybrid	Sichuan	2003	6.417	148.8	95.1	24	2.55	78.5	23.95	NA	NA	NA
bo ¢òyou 270	Indica hybrid	Guangxi	2003	7.749	121.5	101	22.1	2.5725	82.2	23.7	NA	2.6	NA
Cyou 725	Indica hybrid	Sichuan	2003	8.3805	151.5	115.4	25.8	2.3565	81.6	29.6	NA	NA	NA
jin you 458	Indica hybrid	Jiangxi	2003	6.92205	115.8	84.79	NA	3.9495	83.05	28.48	73.32	3.2	60.91
wan dao 93	Indica hybrid	Anhui	2003	8.8575	138	120	NA	NA	80	28.5	170	NA	136
wan dao 91	Indica hybrid	Anhui	2003	9.2115	NA	NA	NA	NA	85	29	155	NA	131.75
Tyou 5537	Indica hybrid	Ministry of Agriculture and Rural Affairs of the People¡®s Republic of China	2003	7.4835	127.2	110.5	23.5	2.64	80.5	29.4	130.2	2.5	104.811
Dqi bao you 1 hao	Indica hybrid	Ministry of Agriculture and Rural Affairs of the People¡®s Republic of China	2003	7.2195	126	115.9	22.6	2.925	80	28.2	132.5	2.6	106
¢òyou 58	Indica hybrid	Ministry of Agriculture and Rural Affairs of the People¡®s Republic of China	2003	9.255	152	114.1	24	2.565	84.2	27.3	163.5	2.4	137.667
fu you 218	Indica hybrid	Ministry of Agriculture and Rural Affairs of the People¡®s Republic of China	2003	9.348	152.5	117.9	24.4	2.61	83.4	27.2	162.7	2.5	135.6918
¢òyou 527	Indica hybrid	Sichuan	2003	8.29185	NA	NA	NA	NA	NA	NA	NA	NA	NA
zhong zhe you 2838	Indica hybrid	Ministry of Agriculture and Rural Affairs of the People¡®s Republic of China	2003	6.8775	121.2	104	25.6	2.775	71.9	27.2	131.8	3.2	94.7642
wei you 111	Indica hybrid	Ministry of Agriculture and Rural Affairs of the People¡®s Republic of China	2003	6.957	123	94.9	22.1	2.805	84.8	28.9	108.3	2.2	91.8384
zhong you 448	Indica hybrid	Ministry of Agriculture and Rural Affairs of the People¡®s Republic of China	2003	7.521	114.2	97	23.9	2.925	83.4	27.6	119.9	3.3	99.9966
liang you 363	Indica hybrid	Ministry of Agriculture and Rural Affairs of the People¡®s Republic of China	2003	7.4835	115.3	94.5	22.2	3.48	75.6	28.1	95	3.3	71.82
wei you 134	Indica hybrid	Ministry of Agriculture and Rural Affairs of the People¡®s Republic of China	2003	7.7835	114.3	92.9	21.3	3.045	78.9	28.7	118.8	2.7	93.7332
an liang you 318	Indica hybrid	Ministry of Agriculture and Rural Affairs of the People¡®s Republic of China	2003	7.809	116.9	94.3	22	3.15	78	28.4	112.7	3	87.906
¢ñyou 86	Indica hybrid	Ministry of Agriculture and Rural Affairs of the People¡®s Republic of China	2003	7.0005	115.5	95	22.2	2.82	79.2	28	126.3	2.8	100.0296
liang you 932	Indica hybrid	Ministry of Agriculture and Rural Affairs of the People¡®s Republic of China	2003	8.5065	140.2	118.4	23.7	2.895	81.5	26	159.8	2.6	130.237
hong you 2009	Indica hybrid	Ministry of Agriculture and Rural Affairs of the People¡®s Republic of China	2003	8.484	148.7	114.5	25.4	2.625	77.5	30.7	150.7	2.9	116.7925
gang you 3551	Indica hybrid	Ministry of Agriculture and Rural Affairs of the People¡®s Republic of China	2003	8.6595	149.2	119	24.6	2.58	84	27.2	163.7	2.3	137.508
xie you 7954	Indica hybrid	Ministry of Agriculture and Rural Affairs of the People¡®s Republic of China	2003	8.796	151.2	110	22.3	2.76	78.2	30	148	2.7	115.736
ba liang you 96	Indica hybrid	Ministry of Agriculture and Rural Affairs of the People¡®s Republic of China	2003	7.566	108.5	86.5	18.5	3.675	86.6	24.2	101.5	2.9	87.899
bo you 998	Indica hybrid	Guangxi	2003	6.957	117	100	22	3.15	87.3	22.1	131	2.6	114.363
bo you 1025	Indica hybrid	Ministry of Agriculture and Rural Affairs of the People¡®s Republic of China	2003	7.3305	115.9	101.6	21.3	3.015	85.6	21.6	138.3	2.8	118.3848
bo you 253	Indica hybrid	Ministry of Agriculture and Rural Affairs of the People¡®s Republic of China	2003	7.488	118.5	118.8	23.9	2.61	84	23.8	140.9	2.6	118.356
bo ¢òyou 15	Indica hybrid	Ministry of Agriculture and Rural Affairs of the People¡®s Republic of China	2003	7.6959	117	107.9	22.1	2.565	84.8	23	148.4	2.6	125.8432
gang you 1577	Indica hybrid	Ministry of Agriculture and Rural Affairs of the People¡®s Republic of China	2003	9.26445	147	114.7	9.4	2.385	80.5	25.7	185.7	2.3	149.4885
shan you 448	Indica hybrid	Ministry of Agriculture and Rural Affairs of the People¡®s Republic of China	2003	6.801	120	94.6	23.5	2.85	82.6	29.3	111.9	2.6	92.4294
¢òyou 718	Indica hybrid	Ministry of Agriculture and Rural Affairs of the People¡®s Republic of China	2003	9.27495	148.5	115.4	24.6	2.385	86	30.4	144.9	2.5	124.614
qing jiang 1 hao	Indica hybrid	Ministry of Agriculture and Rural Affairs of the People¡®s Republic of China	2003	6.7185	148	110	23	2.925	85	NA	145	NA	123.25
qiu you 1025	Indica hybrid	Ministry of Agriculture and Rural Affairs of the People¡®s Republic of China	2003	7.01955	119	107.5	21.8	2.985	77.3	19	157	3.2	121.361
bo you 938	Indica hybrid	Ministry of Agriculture and Rural Affairs of the People¡®s Republic of China	2003	7.6167	118	113	21.8	2.82	85.8	29.1	139.7	2.5	119.8626
bo ¢òyou 213	Indica hybrid	Ministry of Agriculture and Rural Affairs of the People¡®s Republic of China	2003	7.67205	118	113.8	23.2	2.61	78	NA	141.6	2.6	110.448
¢òyou 084	Indica hybrid	Ministry of Agriculture and Rural Affairs of the People¡®s Republic of China	2003	8.406	142.4	121.4	23.3	2.55	86	27.8	160.3	2.6	137.858
xian nong 13 hao	Indica hybrid	Jiangxi	2003	6.2385	107.5	85.84	NA	3.3795	77.86	26.24	98.84	3.1	76.96
xian nong 21 hao	Indica hybrid	Jiangxi	2003	5.45565	110.1	86.47	NA	3.4335	73.71	23.83	102.61	NA	75.63
Tyou 706	Indica hybrid	Jiangxi	2003	6.4035	109.1	87.42	NA	3.7275	70.98	23.12	109.55	3	77.76
tian liang you 66	Indica hybrid	Jiangxi	2003	6.7986	114.9	91.42	NA	3.8985	72.45	25.85	86.69	3.1	62.81
zhong 9you 207	Indica hybrid	Guangdong	2003	6.957	124.5	105	24	NA	82.8	25.6	138	NA	114.264
¢òyou 838	Indica hybrid	Hunan	2003	8.25	132	120	25	NA	85	28	NA	NA	NA
feng you 210	Indica hybrid	Hunan	2003	7.713	113	94.6	21	NA	77	27	116	2.9	89.32
feng you 700	Indica hybrid	Hunan	2003	7.48395	114	93	22	2.7	87.5	28	NA	3.1	NA
Tyou 259	Indica hybrid	Hunan	2003	7.3485	114	105	24	2.7	83.9	NA	131	3	109.909
feng you 428	Indica hybrid	Guangdong	2003	6.06	122	106.8	NA	2.925	77.9	25	128	3.4	99.712
pei za 180	Indica hybrid	Guangdong	2003	6.294	111.5	102.9	21	NA	78.85	19.4	162	NA	127.737
yue you 239	Indica hybrid	Guangdong	2003	7.2885	128	NA	20.2	2.805	85	24.65	139	2.7	118.15
pei za 268	Indica hybrid	Guangdong	2003	6.555	110	105	22	2.76	83.6	22	138	3.1	115.368
zhong you 223	Indica hybrid	Jiangxi	2003	6.98895	123	101.02	NA	2.8305	NA	21.86	123.34	2.9	101.17
xie you 332	Indica hybrid	Jiangsu	2003	10.0197	146	120	NA	2.85	90	31	NA	2.7	120
¢òyou 118	Indica hybrid	Jiangsu	2003	9.9834	145	123	NA	2.4	90	28	NA	2.5	160
29you 559	Indica hybrid	Jiangsu	2003	10.1091	145	120	NA	2.325	88	NA	NA	2.4	160
Dyou 151	Indica hybrid	Fujian	2003	6.63345	128	100	23.5	NA	82.5	28.5	125	NA	103.125
liang you 1019	Indica hybrid	Fujian	2003	6.3846	127	100	24	NA	80	25.5	140	NA	112
D297you ming 86	Indica hybrid	Fujian	2003	8.2095	144	112.5	25	NA	82.5	29	160	NA	132
zhan you 1018	Indica hybrid	Hainan	2003	8.5236	124.1	102.6	21.6	3.1365	86.7	23.3	135.3	NA	117.3051
jin you 808	Indica hybrid	Guangxi	2003	7.527	118	100	23	3	78.9	26.55	NA	3.5	NA
xin xiang you 53	Indica hybrid	Guangxi	2003	8.3535	125	NA	NA	2.7	80.3	28.2	155	3	124.465
zhong you 315	Indica hybrid	Guangxi	2003	6.939	121	115	23	2.7	79.45	25.4	155	3.6	123.1475
you ¢ñ315	Indica hybrid	Guangxi	2003	6.3885	119	113	22	2.55	81.8	24.8	147	2.6	120.246
zhong you 317	Indica hybrid	Guangxi	2003	7.707	120	110	24	2.55	68.5	26.2	142.5	3.2	97.6125
hua you 928	Indica hybrid	Guangxi	2003	6.7431	123	110	NA	2.7	75	24.1	140	2.6	105
te you 227	Indica hybrid	Guangxi	2003	8.3205	123	108	23	2.7	78.8	24.4	137.5	2.6	108.35
qiyou gui 99	Indica hybrid	Guangxi	2003	6.537	128	100	23	2.85	75.6	21.9	150	3	113.4
bo you 258	Indica hybrid	Guangxi	2003	6.5565	123	110	25.5	2.85	80	24.1	130	3.2	104
bo you 315	Indica hybrid	Guangxi	2003	6.9465	122	NA	22.8	2.85	79.8	22.3	142	2.9	113.316
bo you 128	Indica hybrid	Guangxi	2003	7.551	122	110	NA	3.15	85	23	NA	2.5	NA
Kyou 615	Indica hybrid	Shaanxi	2003	9.591	155	110	25	NA	80	29	NA	2.8	NA
Kyou jin gu 3 hao	Indica hybrid	Jiangxi	2003	7.41255	114.2	87.06	NA	3.684	80.25	26.47	90.56	3	72.67
Dyou 261	Indica hybrid	Sichuan	2003	6.6465	150	97	NA	NA	75.5	26	NA	3.1	NA
Cyou 527	Indica hybrid	Sichuan	2003	8.3316	152	119.1	26.6	2.28	81.5	32	NA	4	NA
Nyou 1577	Indica hybrid	Sichuan	2003	8.5035	152	112	NA	NA	76.5	26	NA	2.7	NA
Byou 817	Indica hybrid	Sichuan	2003	7.8135	149	119	26.03	2.2095	80.1	27.2	NA	1.428571429	NA
¢òyou 96	Indica hybrid	Sichuan	2003	8.619	142	111.9	24.7	NA	78.3	26.6	NA	2.2	NA
Dyou 116	Indica hybrid	Sichuan	2003	9.3075	NA	NA	25.6	NA	NA	NA	NA	NA	NA
chuan xiang you 3 hao	Indica hybrid	Sichuan	2003	8.25	142	102.5	NA	NA	80	28	NA	NA	NA
Kyou 8527	Indica hybrid	Sichuan	2003	8.223	151	115	24	NA	80	31	NA	3.1	NA
bo you 141	Indica hybrid	Jiangxi	2003	6.9783	134.3	117.3	NA	2.2335	85.71	25.63	158.2	2.5	135.6
¢òyou 8220	Indica hybrid	Zhejiang	2003	8.2815	139	NA	NA	2.655	87	27.2	NA	NA	135.9
Kyou jin gu 1 hao	Indica hybrid	Jiangxi	2003	7.4472	117.7	93.4	NA	2.997	79.16	27.17	109.41	2.9	86.61
zhong 9you 801	Indica hybrid	Jiangxi	2003	7.1775	124.4	102.06	NA	2.715	76.38	28.06	121.64	3	92.91
¢òyou 98	Indica hybrid	Anhui	2003	8.8395	142	115	NA	NA	85	27.5	165	NA	140.25
wan dao 103	Indica hybrid	Anhui	2003	8.916	136	117.5	NA	NA	80	24	175	NA	140
wan dao 105	Indica hybrid	Anhui	2003	9.1125	NA	NA	NA	NA	80	27	170	NA	136
wan dao 109	Indica hybrid	Anhui	2003	7.0395	126	95	NA	NA	85	28.5	NA	NA	NA
lu liang you 63	Indica hybrid	Guizhou	2003	7.9635	150	110.3	NA	2.7	75.8	28.9	NA	NA	NA
xin you 365	Indica hybrid	Zhejiang	2003	7.11	129	NA	NA	2.5935	85.91	29.2	NA	NA	117.4
wu xiang 880	Indica hybrid	Hubei	2003	7.25745	116.9	92.8	22.9	3.57	74.6	24.41	116	3.3	86.5
yue you 26	Indica hybrid	Hubei	2003	7.5822	117	94.4	24.3	3.09	74.9	28.43	126.3	3.2	94.6
yi you 99	Indica hybrid	Hubei	2003	7.7697	116.8	92.8	22.7	3.375	74.2	27.73	113.6	3.4	84.2
yi you 207	Indica hybrid	Hubei	2003	7.5396	114.8	92.6	22.4	3.18	82.3	27.92	113.7	3.1	93.6
xie you 96	Indica hybrid	Hubei	2003	7.6989	115.3	90.1	21.6	3.48	85.1	28.08	98.7	2.9	84
mao xiang 2 hao	Indica hybrid	Guizhou	2003	7.0605	150.7	100	NA	2.85	69.5	NA	NA	NA	94.8
jin you 554	Indica hybrid	Guizhou	2003	8.1435	150	101.4	NA	2.625	74.2	26.2	NA	NA	122.3
gang you 608	Indica hybrid	Guizhou	2003	7.8255	152.9	105.7	NA	2.52	72.2	26.8	NA	NA	121.7
liang you 662	Indica hybrid	Guizhou	2003	7.428	150	95.4	NA	2.91	78.3	27.7	NA	NA	90.4
mao you 601	Indica hybrid	Guizhou	2003	8.3445	149	94	NA	2.775	77.4	30.1	NA	NA	99.2
liang you 456	Indica hybrid	Guizhou	2003	7.995	149.9	104.8	NA	NA	75.6	31.1	NA	NA	117.1
Kyou 267	Indica hybrid	Guizhou	2003	7.9155	150	98	NA	2.7	80	27	NA	NA	120
qian you 88	Indica hybrid	Guizhou	2003	7.8405	153.2	101	NA	2.745	77.6	27.4	NA	NA	NA
tong you 202	Indica hybrid	Guizhou	2003	7.755	151.8	105.3	NA	2.58	70.2	28.2	NA	NA	115.7
liu liang you 3327	Indica hybrid	Jiangxi	2003	7.01505	118.6	92.71	NA	3.624	71.1	27.34	93.13	3.2	66.22
long jing 12 hao	Japonica inbred	Heilongjiang	2003	7.6134	NA	90	18	NA	NA	29.1	NA	1.8	NA
xiang liang you 98049	Indica hybrid	Jiangxi	2003	6.1956	110.6	83.69	NA	3.9615	77.67	26.11	82.1	3	63.8
lu liang you 28	Indica hybrid	Jiangxi	2003	7.0752	112.1	92.41	NA	3.4005	84.08	25.44	100.67	3.3	84.64
zhong 9you 85	Indica hybrid	Guizhou	2003	8.289	151.3	107.5	NA	NA	74.2	29.1	NA	NA	119.2
you you 998	Indica hybrid	Guangdong	2003	7.5945	125	102	22	2.85	86.2	24.4	141	2.8	121.542
xian nong 16 hao	Indica hybrid	Ministry of Agriculture and Rural Affairs of the People¡®s Republic of China	2003	7.749	122.2	104.5	22.4	2.895	77	25.2	146.6	2.7	112.882
yi xiang you 1577	Indica hybrid	Guangxi	2003	7.263	126	115	NA	2.55	71	24.8	155	3.1	110.05
chuan xiang you 2 hao	Indica hybrid	Ministry of Agriculture and Rural Affairs of the People¡®s Republic of China	2003	8.7	157.4	114.4	24.6	2.52	78	29.1	159	2.8	124.02
fu you 1 hao	Indica hybrid	Ministry of Agriculture and Rural Affairs of the People¡®s Republic of China	2003	9.189	158	111.3	23.5	2.625	82.6	27.4	163.3	2.2	134.8858
Tyou 207	Indica hybrid	Hunan	2003	7.383	114	105	24	3	82.9	26	NA	3.1	NA
jin you 217	Indica hybrid	Hunan	2003	4.07025	133	108.5	24.93	NA	88.83	27.5	NA	3	155
jin you 725	Indica hybrid	Anhui	2003	8.9775	NA	NA	NA	NA	80	27	NA	NA	NA
jin you 718	Indica hybrid	Sichuan	2003	7.47375	148	105.7	25.5	2.235	79	29.6	NA	3	NA
yue you 360	Indica hybrid	Guangxi	2003	8.025	123	102	23	3.3	80.4	26	124.5	3.5	100.098
Dyou 177	Indica hybrid	Sichuan	2003	8.295	153.9	108.9	26.2	2.46	82.1	NA	NA	NA	NA
lu liang you 28	Indica hybrid	Hunan	2003	7.2465	113	95	22.5	NA	85	26	103	3.1	87.55
te you hang 1 hao	Indica hybrid	Fujian	2003	6.9237	128	100	24	NA	87.5	29	137.5	NA	120.3125
xie you 527	Indica hybrid	Sichuan	2003	8.7615	151.9	112.4	24.3	NA	87	31.1	NA	NA	NA
yi xiang you 1577	Indica hybrid	Ministry of Agriculture and Rural Affairs of the People¡®s Republic of China	2003	8.7915	155.1	114.6	25.2	2.625	81.7	26.4	160.4	2.65	131.0468
Byou 827	Indica hybrid	Ministry of Agriculture and Rural Affairs of the People¡®s Republic of China	2003	9.2115	152.5	113.7	25.9	2.505	79.9	28.9	165	3.1	131.835
mian 5you 527	Indica hybrid	Sichuan	2003	8.38125	151.1	113	NA	2.4	80.7	28.9	NA	3.2	NA
gang you 827	Indica hybrid	Sichuan	2003	8.367	153.4	117	26.4	2.226	82.4	28.2	NA	2.7	NA
yang liang you 6 hao	Indica hybrid	Jiangsu	2003	9.513	142	120	NA	2.325	83	28.5	NA	2.9	155
zhong 9you 838xuan	Indica hybrid	Anhui	2003	9.198	135	120	NA	NA	80	29	170	NA	136
mian 5you 527	Indica hybrid	Anhui	2003	9.0525	NA	NA	NA	NA	80	29	NA	NA	NA
yang liang you 6 hao	Indica hybrid	Guizhou	2003	7.914	152.8	104	NA	2.52	75.8	27.6	NA	NA	115.6
zhun liang you 527	Indica hybrid	Hunan	2003	5.022	137.5	125	24	2.25	87.9	30.6	140	NA	123.06
feng you xiang zhan	Indica hybrid	Ministry of Agriculture and Rural Affairs of the People¡®s Republic of China	2003	8.9925	136.5	122.5	23.7	2.355	82.5	27.7	164.8	3.4	135.96
yi xiang you 1577	Indica hybrid	Anhui	2003	8.94	NA	NA	NA	NA	80	27.5	170	NA	136
wan dao 87	Indica hybrid	Anhui	2003	8.9775	140	120	NA	NA	85	29	160	NA	136
hua hang 1 hao	Indica inbred	Ministry of Agriculture and Rural Affairs of the People¡®s Republic of China	2003	7.182	122.8	105.6	20.3	2.985	83.7	22	150	3	125.55
jiu dao 41 hao	Japonica inbred	Ministry of Agriculture and Rural Affairs of the People¡®s Republic of China	2003	8.9955	149.9	106.8	NA	NA	90.7	28.7	98.5	NA	89.3395
liao jing 371	Japonica inbred	Ministry of Agriculture and Rural Affairs of the People¡®s Republic of China	2003	8.7615	154.7	100	NA	NA	82.4	26.2	80.5	NA	66.332
jin jing za 3 hao	Japonica hybrid	Ministry of Agriculture and Rural Affairs of the People¡®s Republic of China	2003	7.4535	170.9	106.3	NA	NA	88.1	24.6	162.6	NA	143.2506
jin you 2003	Japonica hybrid	Ministry of Agriculture and Rural Affairs of the People¡®s Republic of China	2003	8.859	178.7	118.8	NA	3.435	63.5	25.8	207.9	NA	132.0165
wan dao 54	Japonica inbred	Ministry of Agriculture and Rural Affairs of the People¡®s Republic of China	2003	8.1855	156.2	105.6	NA	NA	77.2	26.1	173.2	NA	133.7104
lian jia jing 1 hao	Japonica inbred	Ministry of Agriculture and Rural Affairs of the People¡®s Republic of China	2003	9.234	154.3	107.2	NA	3.3	85.1	25.4	150.5	NA	128.0755
chang you 1 hao	Japonica hybrid	Ministry of Agriculture and Rural Affairs of the People¡®s Republic of China	2003	8.769	145.9	105	18.2	2.865	81.9	27.7	147	1.8	120.393
yongyou 3 hao	Japonica hybrid	Ministry of Agriculture and Rural Affairs of the People¡®s Republic of China	2003	8.1975	146.4	109.4	20.1	2.715	87.2	29.4	133.4	2	116.3248
xiang wan xian10 hao	Indica inbred	Ministry of Agriculture and Rural Affairs of the People¡®s Republic of China	2003	7.137	117.5	98.2	21.5	3.195	78.7	28.4	106.9	3.1	84.1303
ji jing 78 hao	Japonica inbred	Ministry of Agriculture and Rural Affairs of the People¡®s Republic of China	2003	9.5715	147.6	99.7	NA	NA	92.6	26	98	NA	90.748
zhong xuan 972	Indica inbred	Ministry of Agriculture and Rural Affairs of the People¡®s Republic of China	2003	7.83	114.3	94.7	20.8	3	82.2	28.1	116.6	2.8	95.8452
zhong xuan 181	Indica inbred	Ministry of Agriculture and Rural Affairs of the People¡®s Republic of China	2003	7.77	111.5	97.7	20.7	3.225	77.9	28.9	106.2	3	82.7298
jia zao 312	Indica inbred	Ministry of Agriculture and Rural Affairs of the People¡®s Republic of China	2003	7.3605	110	81.5	19.7	3.285	78.2	25.9	108.9	3.2	85.1598
yue feng zhan	Indica inbred	Ministry of Agriculture and Rural Affairs of the People¡®s Republic of China	2003	7.79325	127	107.7	21.2	3.435	82.1	20	143.4	3.3	117.7314
xiu shui 13	Japonica inbred	Ministry of Agriculture and Rural Affairs of the People¡®s Republic of China	2003	7.683	134.6	86.6	14.9	3.915	79.9	25.4	92.6	1.8	73.9874
zhong jin 1 hao	Japonica inbred	Ministry of Agriculture and Rural Affairs of the People¡®s Republic of China	2003	8.208	172	103	19.4	3.375	91.6	26.6	122.4	NA	112.1184
jin jing za 2 hao	Japonica hybrid	Ministry of Agriculture and Rural Affairs of the People¡®s Republic of China	2003	8.5605	175	115	22.8	2.55	73.9	26.6	221.9	NA	163.9841
ken dao 98-1	Japonica inbred	Ministry of Agriculture and Rural Affairs of the People¡®s Republic of China	2003	8.0715	173.4	109	16.5	NA	90	25.6	126.9	NA	114.21
ken yu 16 hao	Japonica inbred	Ministry of Agriculture and Rural Affairs of the People¡®s Republic of China	2003	7.9395	174.6	107.5	NA	3.27	88.3	25.3	127.9	NA	112.9357
yu tian 1 hao	Japonica inbred	Ministry of Agriculture and Rural Affairs of the People¡®s Republic of China	2003	9.6315	153	103	21.5	4.875	84.1	24.3	99.6	NA	83.7636
zhong jian 2 hao	Indica inbred	Hunan	2003	5.769	130	105	NA	NA	87.3	27	NA	3.7	NA
liao jing 288	Japonica inbred	Ministry of Agriculture and Rural Affairs of the People¡®s Republic of China	2003	10.047	154.6	98.4	NA	4.275	88.2	26.6	105.7	NA	93.2274
shen nong 8718	Japonica inbred	Ministry of Agriculture and Rural Affairs of the People¡®s Republic of China	2003	9.4965	155	96.8	NA	NA	87.6	25.5	89.3	NA	78.2268
kai jing 3 hao	Japonica inbred	Ministry of Agriculture and Rural Affairs of the People¡®s Republic of China	2003	10.4325	153.6	89.3	18.5	4.875	87.6	26.5	83.8	NA	73.4088
fu jing 4 hao	Japonica inbred	Ministry of Agriculture and Rural Affairs of the People¡®s Republic of China	2003	9.453	143	95.6	20	NA	82.4	25	86.4	NA	71.1936
ji jing 93	Japonica inbred	Ministry of Agriculture and Rural Affairs of the People¡®s Republic of China	2003	9.528	147.4	111	18.6	NA	79.7	25.4	90	NA	71.73
jiu dao 27 hao	Japonica inbred	Ministry of Agriculture and Rural Affairs of the People¡®s Republic of China	2003	10.041	146.8	97.6	18	NA	85	24.9	96.9	NA	82.365
ning jing 23 hao	Japonica inbred	Ministry of Agriculture and Rural Affairs of the People¡®s Republic of China	2003	10.38	154.7	105.5	NA	NA	84.4	26.7	134.4	NA	113.4336
yang dao 6 hao	Indica inbred	Shaanxi	2003	9	156	110	24	2.85	86	30	156	2.8	134.16
shen nong 606	Japonica inbred	Liaoning	2003	8.5425	158	105	18	NA	NA	25	NA	NA	NA
nan jing 41	Japonica inbred	Jiangsu	2003	9.8085	148	94	NA	3.3	91	26.5	NA	NA	110
hua jing 2 hao	Japonica inbred	Jiangsu	2003	10.14975	150	100	NA	3.3	85	25.5	NA	NA	120
zhong zao 23	Indica inbred	Jiangxi	2003	6.73845	110.9	81.4	NA	3.8775	80.64	26.85	85.5	2.1	68.95
gan wan xian34 hao	Japonica inbred	Jiangxi	2003	5.1942	123.7	100.1	NA	2.88	70.75	26.67	98.24	3.7	69.5
dong ye 1 hao	Japonica inbred	Jiangxi	2003	6.75	132	117.5	NA	3	80.4	25.9	133	1.7	107
zhong zao 21	Indica inbred	Jiangxi	2003	6.64455	113.7	94.61	NA	3.123	78.46	20.84	125.93	2.9	98.81
xiang fu 994	Indica inbred	Hunan	2003	6.9765	112	98	NA	NA	81	25	100	3.2	81
xiang feng zao 119	Indica inbred	Hunan	2003	6.6732	108	90	NA	NA	82.7	27.4	108	2.6	89.316
gan zao xian53 hao	Indica inbred	Jiangxi	2003	6.0993	110.9	87.82	NA	4.218	82.32	23.13	76.78	3.1	63.12
ai xiu zhan	Indica inbred	Guangdong	2003	6.528	113	97.6	21.6	2.7	80.2	22.2	147.1	NA	117.9742
yue nong zhan	Indica inbred	Guangdong	2003	6.1395	127.5	102.3	20	3.165	78.95	20.4	133	NA	105.0035
xu dao 3 hao	Japonica inbred	Jiangsu	2003	9.95565	152	96	NA	3	90	27	NA	NA	120
yan dao 8 hao	Japonica inbred	Jiangsu	2003	9.6657	150	98	NA	3	91	27	NA	NA	120
tong yu jing 1 hao	Japonica inbred	Jiangsu	2003	9.8856	153	100	NA	3.45	90	26	NA	NA	110
yan you 2 hao	Japonica hybrid	Jiangsu	2003	11.17575	157	105	NA	2.925	80	23.5	NA	NA	180
xiang you 18	Japonica hybrid	Jiangsu	2003	10.44675	155	130	NA	2.85	85	25	NA	NA	150
wu jing 13 hao	Japonica inbred	Jiangsu	2003	9.14745	156	100	NA	3	92.5	27	NA	NA	120
jia fu zhan	Indica inbred	Fujian	2003	6.2607	123.6	105	NA	NA	90	30	NA	NA	NA
jin dao 1229	Japonica inbred	Ningxia	2003	10.845	150	95	20	NA	NA	25	NA	1.9	85
jin yuan 5 hao	Japonica inbred	Tianjin	2003	9.042	172	100	20.3	NA	93	26	NA	1.7	NA
jin yuan 13 hao	Japonica inbred	Tianjin	2003	8.1555	173	115	20	NA	96	24	NA	NA	NA
jin jing za 5 hao	Japonica hybrid	Tianjin	2003	9.801	176.5	115	20.4	NA	80	25.4	NA	1.8	NA
jing you 15	Japonica hybrid	Tianjin	2003	10.2	148	95.5	21.2	NA	85.2	24.1	NA	NA	NA
jin sui 1 hao	Japonica inbred	Hebei	2003	8.7465	170	105	16	NA	NA	25	NA	NA	NA
ning jing 31 hao	Japonica inbred	Ningxia	2003	10.2375	NA	NA	16	NA	94.1	23.5	73.5	NA	69.1635
zhong hai xiang 1 hao	Indica inbred	Hainan	2003	5.7678	118.8	104.8	20.26	3.495	71.2	26.6	95.61	3.4	68.07432
liu xiang zhan	Indica inbred	Guangxi	2003	6.315	124	110	22	2.85	78.5	26.1	NA	3.7	NA
he xi xiang	Indica inbred	Guangxi	2003	5.1825	127	105	23	3.15	76.7	18.7	NA	3	NA
gui hua zhan	Indica inbred	Guangxi	2003	6.9375	120	100	22	2.7	76.9	23.6	127.5	3.3	98.0475
xin xiang zhan	Indica inbred	Guangxi	2003	6.5295	123	105	19	2.7	85	20.1	137.5	2.7	116.875
gui nong zhan 2 hao	Indica inbred	Guangxi	2003	6.666	123	98	19	2.7	78	18.7	155	3.2	120.9
yu gui zhan	Indica inbred	Guangxi	2003	5.976	121	105	18	3.3	84.5	17.6	115	3.5	97.175
liao jing 28	Japonica inbred	Liaoning	2003	9.0135	158	107.5	20	NA	NA	25.1	NA	1.8	NA
shen 988	Japonica inbred	Liaoning	2003	8.925	158	99	NA	NA	NA	25	NA	NA	NA
yu tian 6 hao	Japonica inbred	Liaoning	2003	7.8075	162	93.6	16.3	NA	NA	25	NA	NA	NA
fu he 5 hao	Japonica inbred	Liaoning	2003	8.5275	155.5	97.5	16.5	NA	NA	25.5	NA	NA	NA
dan jing 11	Japonica inbred	Liaoning	2003	8.1375	161	99.4	15	NA	NA	25.7	NA	NA	NA
dan jing 12 hao	Japonica inbred	Liaoning	2003	7.938	170	105.3	20	NA	NA	26.9	NA	NA	NA
qiu tian xiao ding	Japonica inbred	Xinjiang	2003	10.5	152.5	80	19	NA	NA	24.5	NA	NA	NA
xin dao 11 hao	Japonica inbred	Henan	2003	7.5405	155	89	16	NA	90	24.2	NA	1.7	NA
yu feng	Japonica inbred	Shanghai	2003	7.0845	158	108	NA	2.85	96	25.5	112.5	NA	108
jiu dao 19 hao	Japonica inbred	Ningxia	2003	11.181	140	90	18	NA	NA	24.5	NA	1.7	85
xi xuan 1 hao	Japonica inbred	Heilongjiang	2003	7.249	NA	104	18.8	NA	92	26.1	NA	NA	NA
wu yu jing 12 hao	Japonica inbred	Shaanxi	2003	8.445	155	88	19	3.15	80	29	NA	NA	96
lv dao 24	Indica inbred	Anhui	2003	8.0535	NA	NA	NA	NA	85	27.5	NA	NA	NA
xiu shui 994	Japonica inbred	Zhejiang	2003	8.949	160.5	NA	NA	3.765	89	25.3	NA	NA	NA
song jing 7 hao	Japonica inbred	Heilongjiang	2003	8.3802	NA	93	17.5	NA	NA	25.5	NA	1.9	NA
jia yu 143	Indica inbred	Zhejiang	2003	6.4665	NA	NA	NA	3.72	79.65	26.3	NA	NA	NA
gan wan xian32 hao	Indica inbred	Jiangxi	2003	7.23795	128.9	108.83	NA	2.7885	79.98	26.31	111.58	3.5	89.24
gan zao xian55 hao	Indica inbred	Jiangxi	2003	6.23505	114.6	85.99	NA	3.468	84.06	22.94	93.64	3	78.72
ning jing 28 hao	Japonica inbred	Ningxia	2003	11.601	150	96	16	NA	92	27	NA	NA	97.5
jin lang 1 hao	Japonica inbred	Jilin	2003	8.0925	133	100	24	NA	90	26.5	NA	NA	NA
tong yu 318	Japonica inbred	Jilin	2003	7.56	136	102	19	NA	95	28	NA	NA	NA
tong jing 611	Japonica inbred	Jilin	2003	7.9545	132	100	16	NA	85	25	NA	NA	NA
xiu shui 217	Japonica inbred	Zhejiang	2003	6.42945	NA	NA	NA	3.105	89.9	28	NA	NA	90.8
ning xiang dao 2 hao	Japonica inbred	Ningxia	2003	10.4355	150	85	16	NA	NA	29	NA	2.1	55
ning jing 29 hao	Japonica inbred	Ningxia	2003	11.2215	145	85	NA	NA	NA	25	75	NA	70
ning you 3 hao	Japonica hybrid	Ningxia	2003	12.426	154	90	NA	NA	88	27.5	100	1.7	88
ning jing 30 hao	Japonica inbred	Ningxia	2003	12.1911	142	88	NA	NA	NA	23.8	82.8	NA	74.7
gan zao xian54 hao	Indica inbred	Jiangxi	2003	6.02955	111.4	87.08	NA	3.7905	79.57	25.52	77.3	3.2	61.53
xin za jing 1 hao	Japonica hybrid	Henan	2003	8.34	142.5	112.5	23	NA	87.5	23	NA	2.2	NA
xi li gong mi	Indica inbred	Guizhou	2003	6.4575	140	97	22.83	NA	80	24.5	98.6	NA	78.88
san jiang 1 hao	Japonica inbred	Heilongjiang	2003	7.241	NA	75	15	NA	NA	27	NA	1.7	NA
dong zao 17	Indica inbred	Hubei	2003	6.23325	108.7	82.7	20	4.23	82.1	25.13	84.6	3.4	69.4
wan dao 70	Japonica hybrid	Anhui	2003	10.413	150	117.5	NA	NA	80	26	170	NA	136
wan dao 89	Indica inbred	Anhui	2003	7.995	138	110	NA	NA	85	29	160	NA	136
wan dao 101	Indica inbred	Anhui	2003	8.121	NA	NA	NA	NA	80	NA	170	NA	136
jiu dao 39 hao	Japonica inbred	Jilin	2003	8.5815	136	95	19.8	NA	90	25.5	NA	NA	NA
te you 2035	Indica inbred	Henan	2003	7.6215	142.5	115	25	NA	90	27.5	NA	3	NA
xiu shui 344	Japonica inbred	Shanghai	2003	8.214	148	NA	NA	3.15	90.5	25	NA	NA	NA
shen you 4 hao	Japonica hybrid	Shanghai	2003	8.3685	155	95	NA	NA	90	25	NA	NA	NA
pu jing 01	Japonica inbred	Shanghai	2003	9.75	NA	85.6	NA	NA	NA	NA	NA	NA	NA
bao nong 34	Japonica inbred	Shanghai	2003	7.5	155	97.5	NA	3.375	NA	27	127.5	NA	115
tong te 1 hao	Japonica inbred	Neimeng	2003	8.0355	138	97.5	NA	NA	NA	23	NA	NA	NA
tong te 2 hao	Japonica inbred	Neimeng	2003	7.9755	145	112.5	21	NA	NA	20	NA	3	NA
jiu dao 35 hao	Japonica inbred	Jilin	2003	7.1475	133	100	19.7	NA	95	26.4	NA	NA	NA
jiu dao 40 hao	Japonica inbred	Jilin	2003	8.199	139	100	17.8	NA	90	25.8	NA	NA	NA
jiu dao 42 hao	Japonica inbred	Jilin	2003	7.4475	138	100	19	NA	90	25.8	NA	NA	NA
ji jing 86 hao	Japonica inbred	Jilin	2003	8.5155	137	96	25	NA	90	25	NA	NA	NA
ji jing 92 hao	Japonica inbred	Jilin	2003	7.9545	144	100	22	NA	96	27	NA	NA	NA
ji jing 89 hao	Japonica inbred	Jilin	2003	7.7145	141	105	28	NA	95	28	NA	NA	NA
ji jing 90 hao	Japonica inbred	Jilin	2003	8.61	145	105	22.5	NA	87.5	27	NA	NA	NA
ji jing 85 hao	Japonica inbred	Jilin	2003	8.343	138	98	23	NA	96.7	27.3	NA	NA	NA
ji jing 87 hao	Japonica inbred	Jilin	2003	7.5375	137	97	23.5	NA	98.7	26.6	NA	NA	NA
ji jing 91 hao	Japonica inbred	Jilin	2003	7.8375	145	100	24	NA	96.7	25.9	NA	NA	NA
chang bai 14 hao	Japonica inbred	Jilin	2003	7.572	133.5	105	25	NA	98.7	28.5	NA	NA	NA
ji jing 84 hao	Japonica inbred	Jilin	2003	7.572	144	86.7	23	NA	91.3	24.8	NA	NA	NA
tong feng 5 hao	Japonica inbred	Jilin	2003	8.0415	134	105	20.5	NA	NA	26.6	NA	NA	NA
tong xi 140	Japonica inbred	Jilin	2003	7.689	136.5	97.9	23.2	NA	NA	23.7	NA	NA	NA
tong 98-56	Japonica inbred	Jilin	2003	7.7571	141	110	22	NA	85	26	NA	1.8	NA
zhong he 1 hao	Japonica inbred	Jilin	2003	8.571	140	96	25	NA	96	30	NA	NA	NA
tong yu 240	Japonica inbred	Jilin	2003	7.962	140	110	19	NA	95	25	NA	NA	NA
chang xuan 12 hao	Japonica inbred	Jilin	2003	8.4645	138	105	18	NA	90	27	NA	NA	NA
ji nong da 18 hao	Japonica inbred	Jilin	2003	8.232	140	105	22.4	NA	90	27	NA	NA	NA
yan jing 25 hao	Japonica inbred	Jilin	2003	7.32	135	101.1	17.1	NA	85	28.1	NA	NA	NA
qiu tian 39	Japonica inbred	Jilin	2003	8.466	141	103.3	17	NA	88.1	25.5	NA	NA	NA
nong jing 1 hao	Japonica inbred	Heilongjiang	2003	6.6456	NA	82.2	15.8	NA	NA	27.1	NA	1.7	NA
sui jing 6 hao	Japonica inbred	Heilongjiang	2003	7.95	NA	86.5	16.7	NA	90.6	27.7	NA	NA	NA
wu gong dao 1 hao	Japonica inbred	Heilongjiang	2003	7.9762	NA	85.35	16.25	NA	97	26.95	NA	NA	NA
dong nong 423	Japonica inbred	Heilongjiang	2003	8.2226	NA	90.5	23.5	NA	NA	27	NA	1.9	NA
long xiang dao 1 hao	Japonica inbred	Heilongjiang	2003	7.8228	NA	92	16.5	NA	NA	25.3	NA	1.7	NA
zhe jing 30	Japonica inbred	Zhejiang	2003	6.4311	134.5	NA	NA	3.495	91.6	25.7	NA	NA	82
xiu shui 209	Japonica inbred	Zhejiang	2003	6.38295	136	NA	NA	3.285	92.7	26.4	NA	NA	85.9
dong wan 12	Japonica inbred	Hubei	2003	6.48945	124.7	90.3	16.6	3.555	84.5	24.35	100.9	1.9	85.3
dong wan 13	Japonica inbred	Hubei	2003	6.90105	125.5	85.8	17.1	3.345	88.7	25.68	93.3	1.8	82.8
jing jing you 1 hao	Japonica inbred	Yunnan	2003	9.978	171	99	19.15	NA	NA	25	NA	NA	NA
bi jing 41 hao	Japonica inbred	Guizhou	2003	5.8224	167.5	100	NA	NA	85	27	NA	NA	125
gan wan xian33 hao	Indica inbred	Jiangxi	2003	6.5232	132.4	92.3	NA	3.282	82.28	19.93	98.15	3.2	80.76
xin ke 2 hao	Indica inbred	Fujian	2003	6.9	NA	95	22	NA	90	22	NA	NA	NA
yongyou 4 hao	Japonica hybrid	Zhejiang	2003	8.526	NA	NA	NA	2.865	84.3	26.2	NA	NA	125.5
feng hua zhan	Indica inbred	Ministry of Agriculture and Rural Affairs of the People¡®s Republic of China	2003	7.011	123.2	97.9	21.8	3.405	82.6	22	135.2	3.2	111.6752
jia yu 21	Indica inbred	Hubei	2003	6.6186	110.5	80.8	20.1	3.885	80.3	26.09	99.9	3.3	80.2
yongyou 4 hao	Japonica hybrid	Ministry of Agriculture and Rural Affairs of the People¡®s Republic of China	2004	9.39075	151.2	123.7	22.5	2.76	84.4	25.9	166	2.2	140.104
10you 18	Japonica hybrid	Ministry of Agriculture and Rural Affairs of the People¡®s Republic of China	2004	9.726	154	117.7	NA	NA	76.8	25.8	182.1	NA	139.8528
xin dao 10 hao	Japonica inbred	Henan	2004	8.826	145	100	18	NA	90	25	NA	1.8	NA
zhe 106	Indica inbred	Zhejiang	2004	6.4125	113.5	NA	NA	2.9475	74.4	27.3	NA	2.9	89.4
feng fu zhan 1 hao	Indica inbred	Guangdong	2004	6.3384	112.5	96.4	20.3	3.2025	76.95	22	120.5	NA	92.72475
ning jing 1 hao	Japonica inbred	Jiangsu	2004	10.119	156	97	NA	3.15	91	28	NA	NA	113
wu jing 15 hao	Japonica inbred	Jiangsu	2004	10.113	156	100	NA	3	93	27.5	NA	NA	120
zhong you 106	Japonica hybrid	Guangxi	2004	7.8015	118.5	105.5	23.7	3.105	73.5	20.8	154.2	2.9	113.337
long jing 13 hao	Japonica inbred	Heilongjiang	2004	7.8264	NA	73.52	15.9	NA	NA	25	NA	1.8	NA
song jing 6 hao	Japonica inbred	Jilin	2004	8.469	133	100	17	NA	93	27	NA	NA	NA
xu dao 4 hao	Japonica inbred	Shandong	2004	8.688	150	95	NA	NA	90	26	130	NA	117
yun c hao 6 hao	Japonica inbred	Yunnan	2004	5.8935	160	97	20	NA	NA	25	NA	NA	110
ji jing 83 hao	Japonica inbred	Hebei	2004	10.5	145	100	20	NA	96	25	NA	NA	NA
ji jing 94 hao	Japonica inbred	Jilin	2004	8.54	138	100	NA	NA	NA	26.6	NA	NA	NA
song jing 8 hao	Japonica inbred	Heilongjiang	2004	8.3869	NA	90.3	17.5	NA	NA	25	NA	1.9	NA
qi li si miao	Indica inbred	Guangdong	2004	6.51615	126	99.2	19.6	3.375	80.7	18.35	123.9	NA	99.9873
te you 009	Indica hybrid	Fujian	2004	6.79605	128	100	23	NA	85	28	NA	2.4	NA
lu liang you 28	Indica hybrid	Guangxi	2004	7.00185	109	NA	20.2	2.865	81.7	25.8	120	3.2	98.04
Qyou 5 hao	Indica hybrid	Chongqing	2004	7.392	157	108	23	2.4	85	25	NA	3.1	NA
¢òyou 363	Indica hybrid	Sichuan	2004	8.2275	153	115	24.5	2.625	81.2	26	NA	2.3	NA
nei xiang you 1 hao	Indica hybrid	Sichuan	2004	7.779	149	116	26	NA	78.25	29	NA	3	119
zhu liang you 02	Indica hybrid	Guangxi	2004	6.771	108	NA	20.4	2.805	83.1	25.8	122.3	3.2	101.6313
Tyou 8086	Indica hybrid	Ministry of Agriculture and Rural Affairs of the People¡®s Republic of China	2004	8.9913	148.4	107.7	24.3	2.58	85.2	27.7	154	2.5	131.208
xie you 527	Indica hybrid	Ministry of Agriculture and Rural Affairs of the People¡®s Republic of China	2004	8.57385	153.2	111.2	24.6	2.55	82.7	32.3	139.2	3.1	115.1184
Dyou 128	Indica hybrid	Hainan	2004	8.5722	128.4	100.4	21.7	3.1365	86.8	25.2	128.8	NA	111.7984
Byou 811	Indica hybrid	Ministry of Agriculture and Rural Affairs of the People¡®s Republic of China	2004	8.42235	152	114.3	25.2	2.475	85	26	169.2	3.1	143.82
Qyou 2 hao	Indica hybrid	Ministry of Agriculture and Rural Affairs of the People¡®s Republic of China	2004	7.9596	154.1	108.5	23.7	2.64	76.6	24.9	171.8	3	131.5988
jin you 448	Indica hybrid	Ministry of Agriculture and Rural Affairs of the People¡®s Republic of China	2004	7.48815	111.9	88.4	23.2	3.06	83.4	28	110.4	3.3	92.0736
zhong 9you 288	Indica hybrid	Ministry of Agriculture and Rural Affairs of the People¡®s Republic of China	2004	7.1295	115.5	103.4	23.8	3.03	80	25.4	131.1	3.2	104.88
yue you hua 4	Indica hybrid	Ministry of Agriculture and Rural Affairs of the People¡®s Republic of China	2004	6.27795	109.1	85.4	22.4	3.405	82.5	27.3	100.2	3.3	82.665
¢òyou hang 1 hao	Indica hybrid	Fujian	2004	6.73845	129	100	24	NA	86	27	135	2.6	116.1
xiang wan xian12 hao	Indica inbred	Ministry of Agriculture and Rural Affairs of the People¡®s Republic of China	2004	6.9927	115.4	98.5	22.2	3.675	85.9	25.3	97.3	3.6	83.5807
guo dao 3 hao	Indica hybrid	Zhejiang	2004	7.8735	131.6	NA	NA	2.415	88.2	27.6	NA	NA	143.3
jin you 213	Indica hybrid	Hunan	2004	7.4451	113	98	21	3.45	80	25	124	2.8	99.2
wu feng you 998	Indica hybrid	Guangdong	2004	7.512	122	98.8	21	NA	85	23.3	128.5	2.75	109.225
zhen you 998	Indica hybrid	Guangdong	2004	6.708	118.5	100	20.8	NA	85.2	24	131	2.7	111.612
bo you 368	Indica hybrid	Guangdong	2004	6.3675	121.5	99.55	22.55	NA	82.8	21	143.5	2.65	118.818
jin you 601	Indica hybrid	Guangdong	2004	8.2914	120	106.27	23.57	NA	82.5	26.32	NA	NA	NA
chuan xiang dao 5 hao	Indica hybrid	Sichuan	2004	7.75245	153	117	24.8	2.28	73.9	28.2	NA	3.2	129.6
¢òyou 205	Indica hybrid	Jiangsu	2004	9.4755	146	125	NA	2.55	90	28.6	NA	2.5	145
ba you 8 hao	Japonica hybrid	Ministry of Agriculture and Rural Affairs of the People¡®s Republic of China	2004	8.50395	149.4	112.2	18.2	3.045	81.8	26	139.5	1.8	114.111
hua you guang kang zhan	Indica hybrid	Jiangsu	2004	9.4725	142	122	NA	2.7	85	28	NA	3.4	138
69you 8 hao	Japonica hybrid	Ministry of Agriculture and Rural Affairs of the People¡®s Republic of China	2004	9.609	158.3	109.4	NA	NA	77.6	27.3	175.5	NA	136.188
jin dao 1007	Japonica inbred	Ministry of Agriculture and Rural Affairs of the People¡®s Republic of China	2004	9.021	156.6	99	NA	NA	84.5	23.7	142.6	NA	120.497
ming yue	Japonica inbred	Ministry of Agriculture and Rural Affairs of the People¡®s Republic of China	2004	8.988	176.9	97.2	NA	NA	84.5	26.8	112.5	NA	95.0625
zhong hua 17 hao	Japonica inbred	Ministry of Agriculture and Rural Affairs of the People¡®s Republic of China	2004	8.22	173.8	104.7	NA	NA	89	24.1	120.1	NA	106.889
liao you 1518	Japonica hybrid	Ministry of Agriculture and Rural Affairs of the People¡®s Republic of China	2004	10.425	155.2	106.2	NA	NA	84.6	26.9	143.2	NA	121.1472
jing you 14	Japonica hybrid	Ministry of Agriculture and Rural Affairs of the People¡®s Republic of China	2004	10.9185	154.6	103.5	NA	NA	88.3	26.8	116.4	NA	102.7812
zhongzuo9936	Japonica inbred	Ministry of Agriculture and Rural Affairs of the People¡®s Republic of China	2004	8.913	153	109.3	NA	NA	86	25.9	111.9	NA	96.234
hua yu 560	Japonica inbred	Ministry of Agriculture and Rural Affairs of the People¡®s Republic of China	2004	9.9735	160.1	97.4	NA	NA	90.8	27.1	104.8	NA	95.1584
liao jing 92-34	Japonica inbred	Ministry of Agriculture and Rural Affairs of the People¡®s Republic of China	2004	9.93	156.4	88.5	NA	NA	88.1	21.9	108.7	NA	95.7647
shen dao 7 hao	Japonica inbred	Ministry of Agriculture and Rural Affairs of the People¡®s Republic of China	2004	8.8305	152.3	93.8	NA	NA	90.4	26.2	73.1	NA	66.0824
yi Swan 2 hao	Indica hybrid	Jiangxi	2004	5.8431	112	97.8	NA	2.7	NA	27.1	129.2	3.4	98.2
an liang you qing zhan	Indica hybrid	Jiangxi	2004	6.40095	111.7	99.7	NA	3.195	NA	24	121.6	3.4	89.5
jin you ming 100	Indica hybrid	Fujian	2004	7.25895	124	100	23.4	NA	80	27	NA	3.2	NA
Tyou 551	Indica hybrid	Fujian	2004	6.5925	128	95	22	NA	85	29	120	2.5	102
yi feng 8 hao	Indica hybrid	Sichuan	2004	8.3355	150	114	24.5	2.625	80	31.5	NA	NA	NA
luxiang 615	Indica hybrid	Sichuan	2004	8.01645	150	118.3	24.7	2.253	70.64	27	NA	2.9	NA
tian feng you 880	Indica hybrid	Guangdong	2004	6.09435	125	101.815	22.19	NA	83.815	25.98	NA	3.2	NA
Tyou 463	Indica hybrid	Guangxi	2004	6.687	113	103.8	22.4	2.76	82.6	26.9	130.7	3.3	107.9582
H28you 207	Indica hybrid	Guangxi	2004	7.2315	117	106.7	22	2.73	83.3	27.5	126.1	3.2	105.0413
bo ¢óyou 273	Indica hybrid	Guangxi	2004	7.764	120	110.2	24.4	2.4	92.1	25.5	140.6	2.6	129.4926
tian you 128	Indica hybrid	Hainan	2004	7.92045	120	94.1	19.5	3.105	86.29	25.8	120.4	NA	103.89316
yi nong 1 hao	Indica hybrid	Guizhou	2004	8.25	149.22	108	NA	2.85	77.9	27	NA	2.6	NA
Kyou 52	Indica hybrid	Anhui	2004	9.105	126	115	NA	NA	80	28	NA	NA	NA
xi nong you 1 hao	Indica hybrid	Chongqing	2004	8.0013	157	113.7	25.4	NA	84.6	27	NA	NA	NA
yue you 360	Indica hybrid	Hunan	2004	6.8283	112	95	NA	3.3	80	27	111	3.1	88.8
zhu liang you 99	Indica hybrid	Hunan	2004	6.7575	110	90	21	2.856	80	28	110	3.1	88
jin you 188	Indica hybrid	Sichuan	2004	8.388	151	120	NA	2.307	75.3	28.2	NA	2.8	NA
shu long you 4 hao	Indica hybrid	Sichuan	2004	7.9185	149	118	26	2.4075	78.93	26.5	NA	3	NA
lu liang you 106	Indica hybrid	Hunan	2004	9.8835	139	125	26	2.55	82	28.5	164.8	3.2	135.136
chuan xiang 9838	Indica hybrid	Sichuan	2004	8.22705	152	118.7	25.6	2.3925	79.5	30.4	NA	2.6	NA
liang you 6326	Indica hybrid	Anhui	2004	9.3975	141	115	NA	NA	80	27	NA	NA	NA
jin you 38	Indica hybrid	Hubei	2004	7.647	116.4	98	23.7	3.18	78.7	29.83	109.9	3.3	86.5
nei xiang you 9 hao	Indica hybrid	Guizhou	2004	7.8375	147.79	109.86	NA	2.79	76.95	31.18	NA	2.9	111.75
zhong 9you 115	Indica hybrid	Yunnan	2004	11.37	155	111	26	NA	79	28.5	NA	3.3	NA
qiu you 998	Indica hybrid	Ministry of Agriculture and Rural Affairs of the People¡®s Republic of China	2004	6.5097	119.3	106.6	22.8	3.03	85.6	20.9	137.1	3	117.3576
¢òyou 602	Indica hybrid	Ministry of Agriculture and Rural Affairs of the People¡®s Republic of China	2004	9.0477	155.7	110.6	24.6	2.445	82.4	29.7	150.5	2.3	124.012
mian 2you 838	Indica hybrid	Ministry of Agriculture and Rural Affairs of the People¡®s Republic of China	2004	8.868	150.4	110.7	25.2	2.385	81.8	28.9	163	2.7	133.334
jin you 18	Indica hybrid	Ministry of Agriculture and Rural Affairs of the People¡®s Republic of China	2004	8.71575	152.4	112.4	25.3	2.52	76.3	29.3	165.9	3.1	126.5817
hong you 527	Indica hybrid	Ministry of Agriculture and Rural Affairs of the People¡®s Republic of China	2004	8.68095	153	114.1	25.8	2.43	79.2	32.7	152.4	2.9	120.7008
xie you 527	Indica hybrid	Hubei	2004	9.09255	138.2	115.7	23.9	2.88	83.3	32.02	129.5	3.1	107.9
Dyou 363	Indica hybrid	Ministry of Agriculture and Rural Affairs of the People¡®s Republic of China	2004	8.5122	154.6	110.8	25	2.505	78.7	27.3	167.8	2.8	132.0586
¢òyou xiang 13 hao	Indica hybrid	Ministry of Agriculture and Rural Affairs of the People¡®s Republic of China	2004	8.2902	156.8	116.4	25.6	2.4	81.8	27.9	161.6	2.3	132.1888
jin you 527	Indica hybrid	Ministry of Agriculture and Rural Affairs of the People¡®s Republic of China	2004	8.8482	151.2	111.5	25.7	2.475	80.9	29.5	161.7	3.2	130.8153
zhong you 7 hao	Indica hybrid	Ministry of Agriculture and Rural Affairs of the People¡®s Republic of China	2004	8.65335	151.8	113.2	25.2	2.64	80.6	26	166.8	3.1	134.4408
Dyou 128	Indica hybrid	Ministry of Agriculture and Rural Affairs of the People¡®s Republic of China	2004	8.5293	155	111.5	23.6	2.655	78.9	24.5	174.3	2.8	137.5227
ming you 98	Indica hybrid	Ministry of Agriculture and Rural Affairs of the People¡®s Republic of China	2004	9.32115	133.8	117.6	24	2.565	85.6	27.1	159.5	2.5	136.532
¢òyou 7954	Indica hybrid	Ministry of Agriculture and Rural Affairs of the People¡®s Republic of China	2004	9.228	136.3	118.9	23.9	2.355	78.3	27.3	174.1	2.3	136.3203
xie you 5968	Indica hybrid	Ministry of Agriculture and Rural Affairs of the People¡®s Republic of China	2004	9.04065	138.1	117.5	22.3	2.685	79.6	29	142.7	2.6	113.5892
feng you 559	Indica hybrid	Ministry of Agriculture and Rural Affairs of the People¡®s Republic of China	2004	9.09495	137.1	120.2	24	2.745	83.4	25.1	158.1	2.8	131.8554
xie you 80	Indica hybrid	Ministry of Agriculture and Rural Affairs of the People¡®s Republic of China	2004	7.57245	115.1	92.7	21.4	2.985	85.6	28	108	3.1	92.448
feng you 9 hao	Indica hybrid	Ministry of Agriculture and Rural Affairs of the People¡®s Republic of China	2004	7.86405	113.4	91	20.9	3.12	83.9	28	112.1	3.1	94.0519
zhong 9you 288	Indica hybrid	Hubei	2004	7.9959	116.7	98.6	23.9	3.39	78.8	25.81	126.2	3	99.5
yue you hua 4	Indica hybrid	Guangxi	2004	6.6225	116.5	90.3	22.3	3.015	73.8	27.2	121.4	3.3	89.5932
feng you 416	Indica hybrid	Ministry of Agriculture and Rural Affairs of the People¡®s Republic of China	2004	7.43235	122.9	96.6	22.5	2.91	83.5	28.2	112.9	2.7	94.2715
feng you 191	Indica hybrid	Ministry of Agriculture and Rural Affairs of the People¡®s Republic of China	2004	7.42935	121.7	97	23.3	2.73	82.1	30	124.2	2.9	101.9682
san xiang you 714	Indica hybrid	Ministry of Agriculture and Rural Affairs of the People¡®s Republic of China	2004	7.3389	123.9	111.1	24.7	2.715	76	30.1	123.4	2.7	93.784
guo dao 2 hao	Indica hybrid	Ministry of Agriculture and Rural Affairs of the People¡®s Republic of China	2004	6.68445	118.1	108.5	25.5	2.595	79	30	128.1	3.1	101.199
pei liang you 210	Indica hybrid	Ministry of Agriculture and Rural Affairs of the People¡®s Republic of China	2004	6.60225	118.3	106.9	22.7	2.91	73.2	26.1	133.9	3	98.0148
fu you 98	Indica hybrid	Ministry of Agriculture and Rural Affairs of the People¡®s Republic of China	2004	8.2932	151	111	23	2.925	85	29	145	2.7	123.25
you you 998	Indica hybrid	Guangdong	2004	7.5945	128	102	22	2.85	86.2	24.4	NA	2.8	NA
yi xiang you 1577	Indica hybrid	Hubei	2004	7.98525	139	114.6	26.2	2.655	77.3	26.53	162.7	3	125.8
guo dao 3 hao	Indica hybrid	Jiangxi	2004	6.08715	120	101.7	NA	3.015	76.9	26.4	126.2	3.4	97.1
Tyou 111	Indica hybrid	Hunan	2004	7.3215	123	108	NA	2.865	79.6	26	126.4	2.7	100.6144
jin you 463	Indica hybrid	Hunan	2004	7.2834	115	93.4	NA	3.2925	76.9	27.9	110	NA	84.59
fei you 600	Indica hybrid	Zhejiang	2004	7.5855	133.7	NA	NA	2.385	87.8	28.9	NA	NA	128.2
liang you 1169	Indica hybrid	Jiangxi	2004	7.39755	121.7	113.1	NA	2.715	80.2	26.7	123.9	3.4	99.4
quan you 36	Indica hybrid	Zhejiang	2004	8.3025	125.6	NA	NA	2.445	85.3	29.7	NA	NA	125.5
xie you 205	Indica hybrid	Zhejiang	2004	7.2735	128.3	NA	NA	2.79	87.4	29.9	NA	NA	100.5
zhong you 205	Indica hybrid	Zhejiang	2004	8.0385	130.1	NA	NA	2.505	86.1	26.8	NA	NA	125.7
yue za 889	Indica hybrid	Guangdong	2004	6.558	114.5	97.1	22.6	NA	76	25.5	132	3.1	100.32
qiu you 452	Indica hybrid	Guangdong	2004	6.501	120	100.95	22.9	NA	80	19.55	146	3	116.8
zhong you 523	Indica hybrid	Guangdong	2004	7.47	126	100	21.5	NA	82	23.3	130	2.8	106.6
long you 665	Indica hybrid	Guangdong	2004	6.2955	120	106.85	23.6	NA	84.55	25	125	2.7	105.6875
yue za 2004	Indica hybrid	Guangdong	2004	6.6555	114	104.65	22	NA	78.1	24.5	141	3.1	110.121
bo you 263	Indica hybrid	Guangdong	2004	6.444	123	103.2	21.9	NA	87.05	21.25	131	2.45	114.0355
zhong you 238	Indica hybrid	Guangdong	2004	7.1685	125	104	21.9	NA	85.5	22.3	118.5	3	101.3175
lin dao 11 hao	Japonica inbred	Shandong	2004	8.9595	152	95	16	3.27	NA	26.5	NA	1.7	108.5
feng you 128	Indica hybrid	Shaanxi	2004	8.916	155.4	109.5	24.2	3.045	NA	25	182	3	135.6
hua you gui 99	Indica hybrid	Fujian	2004	7.87845	140	100	23	NA	85	24	NA	3	NA
shuo feng 2 hao	Indica hybrid	Sichuan	2004	8.39625	154	118	26.5	2.4	81	27	NA	2.4	NA
xin xiang you 80	Indica hybrid	Hubei	2004	7.74915	115.1	91	22.1	3.57	80.2	26.28	109.4	3	87.8
tian you 218	Indica hybrid	Jiangsu	2004	9.6735	144	110	NA	2.475	85	25.2	NA	3.1	145
feng you 336	Indica hybrid	Jiangsu	2004	9.2565	143	115	NA	2.4	86	25.7	NA	3.2	165
jia yu 46	Indica inbred	Zhejiang	2004	6.3285	110.3	NA	NA	3.015	72.3	22.9	NA	NA	106.2
zhong zao 22	Indica inbred	Zhejiang	2004	4.9275	112	NA	NA	2.625	74.2	27.5	NA	NA	118.2
s hao jia 1 hao	Indica inbred	Zhejiang	2004	6.567	108.5	82.4	NA	3.72	82	25.7	96	3.4	78.7
feng you 084	Indica hybrid	Jiangsu	2004	9.159	142	120	NA	2.7	85	27	NA	3.1	135
xie you 084	Indica hybrid	Jiangsu	2004	9.7155	142	117	NA	2.7	91	30	NA	2.9	125
hua liang you 106	Indica hybrid	Jiangxi	2004	6.92415	107.5	88.8	NA	3.555	76.9	27.4	96.6	3.3	74.3
long ping 601	Indica hybrid	Jiangxi	2004	6.8337	123	98.3	NA	2.805	75.6	28.5	115.7	2.8	87.5
chang you 4 hao	Indica hybrid	Jiangxi	2004	7.29315	129	127.1	NA	2.535	NA	22.5	178.8	2.8	138.2
yuan jing 41	Japonica inbred	Zhejiang	2004	8.4315	154.8	NA	NA	3.42	86.9	26.3	NA	NA	100.8
zhe jing 27	Japonica inbred	Zhejiang	2004	8.4	158	92.2	NA	3.495	94.6	29.9	NA	NA	89.2
jia hua 1 hao	Japonica inbred	Zhejiang	2004	8.736	158	NA	NA	3.315	92.5	25.8	124	NA	114.7
jia he 212	Japonica inbred	Zhejiang	2004	8.232	151.5	NA	NA	3.09	93.3	27.9	103.3	2.9	96.3789
jia zao 324	Indica inbred	Zhejiang	2004	6.2145	111.1	83.1	20.2	3.09	69	25.9	133.4	3.3	91.9
zhe jian 21	Indica inbred	Zhejiang	2004	6.31125	109.8	NA	NA	5.055	82.9	23	NA	3.4	60
zhe 103	Indica inbred	Zhejiang	2004	6.1155	108.8	97.6	NA	2.8215	75.8	27.4	NA	3.4	113.5
wen 220	Indica inbred	Zhejiang	2004	7.044	112	NA	NA	3.285	78.4	23.6	NA	3.3	84.7
chang you 2 hao	Indica hybrid	Jiangxi	2004	7.8159	140.7	128.4	NA	2.52	79.1	25.5	182.1	3	144.1
xian nong 11 hao	Indica hybrid	Jiangxi	2004	7.5807	139.3	130.1	NA	2.16	74.7	26.8	194.4	3	145.3
xian nong 20 hao	Indica hybrid	Jiangxi	2004	5.86665	109.4	94.8	NA	3.405	NA	24.2	109.8	3.7	80.5
xian nong 24 hao	Indica hybrid	Jiangxi	2004	6.09015	110	96.8	NA	3.075	NA	25.5	135.9	3.4	97.4
jiang si you 992	Indica hybrid	Jiangxi	2004	6.3612	111.4	98	NA	3.24	NA	25.7	123.8	3.3	90.6
SPyou ¢ñ98	Indica hybrid	Jiangxi	2004	6.48915	121.3	99.1	NA	2.85	77.5	26.9	120.4	2.8	93.3
za he A906	Indica hybrid	Jiangxi	2004	6.77115	122.4	104.9	NA	2.82	72.6	24.6	136.2	2.8	98.9
tian liang you 9 hao	Indica hybrid	Jiangxi	2004	5.0385	116.1	103.3	NA	2.985	77.2	24.3	114.7	3.6	88.6
¢òyou 183	Indica hybrid	Fujian	2004	8.2422	145	110	24	NA	85	27	NA	2.6	NA
te you 923	Indica hybrid	Fujian	2004	6.64875	129	100	22	NA	85	27	150	2.4	127.5
te you 671	Indica hybrid	Fujian	2004	7.87305	142	110	23	NA	85	29	NA	2.6	NA
¢òyou 1273	Indica hybrid	Fujian	2004	8.2953	145	120	26	NA	86	28	160	2.5	137.6
mian 5you 151	Indica hybrid	Fujian	2004	8.0394	146	110	25	NA	80	29	NA	3.4	NA
Cyou 2095	Indica hybrid	Sichuan	2004	8.4195	151	121.3	25.4	2.5785	80.3	31.5	NA	3	NA
rong dao 8 hao	Indica hybrid	Sichuan	2004	8.451	153.5	114	25	2.475	81.4	25	NA	2.8	NA
xiang you 402	Indica hybrid	Guangxi	2004	6.7155	112	NA	20.5	3.165	74.4	28.8	114.7	3.6	85.3368
Tyou 433	Indica hybrid	Guangxi	2004	6.6705	111	96.1	21.2	2.67	72.4	25.3	143.2	3	103.6768
Tyou 974	Indica hybrid	Guangxi	2004	6.462	109.5	95.8	22.1	2.88	68.3	24.3	142	3.4	96.986
78you 185	Indica hybrid	Guangxi	2004	7.47	117	116.8	25	2.55	83.5	25.4	150	2.6	125.25
yan liang you 9218	Indica hybrid	Guangxi	2004	7.2615	119	110.8	21.2	2.58	78.4	24.1	164.6	2	129.0464
xin liang you 821	Indica hybrid	Guangxi	2004	7.869	119	112.1	25.6	2.31	70.9	26.4	168.7	3.1	119.6083
jin you 315	Indica hybrid	Guangxi	2004	8.0715	116.5	113.1	24.1	2.775	76.7	25.4	144	3	110.448
an liang you 1 hao	Indica hybrid	Guangxi	2004	7.455	118.5	105.3	21.1	2.685	75.7	25.6	148.4	3.04	112.3388
zhong you 679	Indica hybrid	Guangxi	2004	7.416	119	NA	25.2	2.565	79.6	26.4	136.5	3.2	108.654
zhong you 258	Indica hybrid	Guangxi	2004	7.083	120	120.6	25.7	2.67	75.3	26.3	140.4	3.1	105.7212
te you 649	Indica hybrid	Guangxi	2004	7.26	121	113.2	22.6	2.415	78.1	26.9	163.9	2.5	128.0059
ba hong you 256	Indica hybrid	Guangxi	2004	7.0935	122	123.2	25.4	2.625	78.1	26.6	148.4	3.4	115.9004
jin you 975	Indica hybrid	Guangxi	2004	7.3605	122	113.1	NA	2.565	77.1	26.9	156.7	3	120.8157
pei liang you 93	Indica hybrid	Guangxi	2004	7.8885	123	107.9	22.4	2.925	83.9	22.8	137.7	3.2	115.5303
liang you 1193	Indica hybrid	Guangxi	2004	7.068	118	110.6	24.6	2.43	85.7	29.3	126.6	2.9	108.4962
bo ¢òyou 6410	Indica hybrid	Hainan	2004	4.9509	115	107.8	21.2	2.745	74	23.1	119	NA	88.06
yue za 922	Indica hybrid	Hainan	2004	7.37505	127	100	21.75	3.225	78.7	26	121.5	NA	95.6205
cong you 9919	Indica hybrid	Hainan	2004	7.51755	124	94.1	20.1	3.015	81.5	25.8	123.4	NA	100.571
qiong xiang liang you 1 hao	Indica hybrid	Hainan	2004	7.55925	135.8	112.5	23.85	3.0135	71.9	24.1	144.7	NA	104.0393
si you 0848	Indica hybrid	Hainan	2004	7.88925	127.2	103.61	22.16	2.898	84.1	26.1	125.6	NA	105.6296
mian 5you 3551	Indica hybrid	Sichuan	2004	8.39145	153	115.8	24.7	2.82	79.9	25.9	NA	2.5	NA
tai xiang 5 hao	Indica hybrid	Sichuan	2004	7.641	153	118	25	2.25	70.6	27	NA	2.9	136
chuan xiang 9 hao	Indica hybrid	Sichuan	2004	7.809	151	105	24	2.16	81.8	31	NA	2.7	NA
yi you 3003	Indica hybrid	Sichuan	2004	8.49	154	117	24.1	2.865	83.3	27.7	NA	2.5	NA
rong dao 9 hao	Indica hybrid	Sichuan	2004	7.6308	151.5	119	24.9	2.343	75.2	28.3	NA	3.3	119
shu long you 3 hao	Indica hybrid	Sichuan	2004	7.7619	149.5	103	24	2.25	81	30	NA	3	NA
geng yun 2 hao	Indica hybrid	Henan	2004	8.8005	151	NA	30.5	NA	88	30.5	NA	2.9	148
jin you 602	Indica hybrid	Guangdong	2004	7.7475	118	104.085	23.38	NA	83.745	25.615	NA	NA	NA
jin dao 2 hao	Indica hybrid	Guangdong	2004	6.7335	122	104.5	23.5	2.775	74.5	27	145	NA	108.025
Dyou 162	Indica hybrid	Fujian	2004	7.39635	125	90	22	NA	80	29	NA	2	NA
feng you 880	Indica hybrid	Guangdong	2004	5.5995	111	99	23	3.15	72.5	25	128	NA	92.8
feng you 28	Indica hybrid	Shaanxi	2004	9.264	157	118.7	25.3	3.09	76	26.5	171.2	3.1	129.8
gang you 2009	Indica hybrid	Guizhou	2004	8.52615	153.88	112	NA	2.85	83	27	NA	NA	NA
Dyou 3232	Indica hybrid	Hubei	2004	8.4135	140.2	115.5	26.3	2.64	79.2	28.94	146	3.4	115.6
Kyou 130	Indica hybrid	Guangdong	2004	6.468	119.3	104.5	22.85	2.6925	77	31.95	119.4	NA	91.938
¢òyou 87	Indica hybrid	Hubei	2004	8.39205	137.6	114.9	25.5	2.625	81.4	29.61	141.5	2.4	115.3
feng yuan you 299	Indica hybrid	Hunan	2004	7.0353	114	97	22	2.85	80	29.5	135	3	108
jin you 899	Indica hybrid	Hunan	2004	7.4682	113.1	90	21	3.36	80	27	120	3.6	96
wei tian 9 hao	Indica hybrid	Chongqing	2004	7.2945	161	107.5	NA	2.226	84	29.3	NA	2.8	NA
zhu liang you 505	Indica hybrid	Hunan	2004	7.2795	109	88	NA	3.255	81	27.1	102.1	3.2	82.701
¢ñyou 899	Indica hybrid	Hunan	2004	7.3968	114	90	19	3.3	89	26	116	2.9	103.24
¢òyou 998	Indica hybrid	Guangdong	2004	6.4215	117.55	103.95	23.2	2.7225	79.15	24.85	138.6	NA	109.7019
yi xiang 9303	Indica hybrid	Chongqing	2004	7.74135	163.1	111.7	27	NA	81.3	28.2	NA	3	NA
yu you 11 hao	Indica hybrid	Chongqing	2004	9.69	160.5	105	27	NA	NA	26	NA	3.1	NA
jin dao 1 hao	Indica hybrid	Guangdong	2004	6.564	121.85	109.55	23.25	2.805	74.45	26.35	146	NA	108.697
xi nong you 7 hao	Indica hybrid	Chongqing	2004	8.7789	160	117	NA	NA	86	27.2	NA	2.3	NA
hua liang you 103	Indica hybrid	Hubei	2004	6.58875	112.6	91.2	21.2	3.3	83.2	25.64	108.4	3.4	90.2
yi you 29	Indica hybrid	Hubei	2004	8.30985	132.4	115.4	25.6	2.805	79.3	27.32	150.1	3.2	119.1
liang you 277	Indica hybrid	Hubei	2004	7.51755	116	101.7	22.6	3.675	82.2	22.91	114.6	2.9	95.3
jin you 179	Indica hybrid	Hunan	2004	8.055	133	116.1	27	2.85	81.2	28	157.3	3.3	127.7276
¢òyou 640	Indica hybrid	Hunan	2004	8.2725	140	112.9	25	NA	88.7	NA	153.9	2.65	136.5093
fu you 527	Indica hybrid	Hunan	2004	8.9025	141	112	26	2.25	83.5	27	176	2.5	146.96
xie you 716	Indica hybrid	Hunan	2004	8.0205	140	117.1	NA	2.475	87	32.1	NA	3.1	NA
Kyou 954	Indica hybrid	Anhui	2004	8.826	132	110	NA	NA	80	26.5	NA	NA	NA
xie you 978	Indica hybrid	Anhui	2004	8.769	120	92	NA	NA	80	28	120	NA	96
Kyou 583	Indica hybrid	Anhui	2004	8.577	120	100	NA	NA	78	30	NA	NA	NA
xiang you 63	Indica hybrid	Guangdong	2004	6.7725	111.15	103.25	22.9	2.9025	79	28.95	NA	NA	NA
wan dao 135	Indica hybrid	Anhui	2004	8.6775	121	95	NA	NA	80	27	115	NA	92
shan you 456	Indica hybrid	Guizhou	2004	7.83	152.5	102.3	NA	2.295	73.2	28.4	NA	2.4	127.6
shan you 608	Indica hybrid	Guizhou	2004	7.437	152.6	97.6	NA	2.535	74.2	27.2	NA	2.3	119.7
zhen you 2020	Indica hybrid	Guizhou	2004	7.77	152.86	108.16	NA	2.7825	73.74	30.76	NA	3.1	105.58
nei xiang you 14 hao	Indica hybrid	Guizhou	2004	7.449	150.19	111.22	NA	2.6355	75.24	32.62	NA	3.7	106.97
qian you lian he 9 hao	Indica hybrid	Guizhou	2004	7.9875	153	106.35	NA	2.55	74.83	28	NA	2.6	117.11
qian you 301	Indica hybrid	Guizhou	2004	7.7025	149	98	NA	2.7	72	26.7	NA	2.9	103.8
qian xiang you 2000	Indica hybrid	Guizhou	2004	7.5255	145.9	94	NA	3	73.8	27	NA	3	95.5
qian liang you 58	Indica hybrid	Guizhou	2004	7.9725	147.5	95.6	NA	3	76.1	28	NA	3	104.06
nei xiang you 6 hao	Indica hybrid	Yunnan	2004	11.175	163.5	115	23.7	NA	71.2	29	NA	2.6	NA
zhong 9you 663	Indica hybrid	Guangdong	2004	8.55315	127	107.31	25.15	NA	83.975	26.775	NA	NA	NA
ming you 527	Indica hybrid	Fujian	2004	8.6025	170	130	25	NA	84	29	185	2.5	155.4
shan you ming 100	Indica hybrid	Fujian	2004	6.8145	130	100	23	NA	82	27.5	NA	2.4	NA
Tyou 7882	Indica hybrid	Fujian	2004	7.1025	126	95	21	NA	80	25	NA	2.6	NA
te you 6355	Indica hybrid	Fujian	2004	7.056	147.5	105	24	NA	85	28	140	2.5	119
te you hang 1 hao	Indica hybrid	Zhejiang	2004	8.757	138.9	NA	NA	2.13	90	30.3	NA	NA	130.1
zhu liang you 02	Indica hybrid	Ministry of Agriculture and Rural Affairs of the People¡®s Republic of China	2004	7.38465	113.6	94.6	20	3.36	85.7	25.8	102.3	3.1	87.6711
xie you 527	Indica hybrid	Guangdong	2004	6.1755	115.95	104.2	23.75	2.6925	79.5	32.4	114.5	NA	91.0275
nei xiang you 3 hao	Indica hybrid	Ministry of Agriculture and Rural Affairs of the People¡®s Republic of China	2004	8.4819	150.3	114.2	25.2	2.61	78.2	30.1	145.6	3.1	113.8592
yi xiang 3003	Indica hybrid	Ministry of Agriculture and Rural Affairs of the People¡®s Republic of China	2004	8.72055	153.1	115.3	26.2	2.7	78.4	29.9	142.6	3	111.7984
guo dao 1 hao	Indica hybrid	Jiangxi	2004	7.53255	123.7	118.9	NA	2.49	NA	27.5	152.6	3.3	116.9
Tyou 6135	Indica hybrid	Ministry of Agriculture and Rural Affairs of the People¡®s Republic of China	2004	6.6336	121.3	108.1	24.7	2.535	73.8	25	165.9	3.2	122.4342
feng you xiang zhan	Indica hybrid	Henan	2004	7.7985	145	115	24	NA	85	28	NA	3.5	NA
hong lian you 6 hao	Indica hybrid	Jiangxi	2004	7.8342	126.4	115.4	NA	2.595	77.7	27	156.3	3.3	121.5
zhong 9you 838xuan	Indica hybrid	Guizhou	2004	8.5695	150.4	110	NA	NA	85	28	170	NA	144.5
tian you 428	Indica hybrid	Guangdong	2004	6.5142	121	111.28	23.4	NA	81.35	28	132.44	3	107.73994
lv you 1 hao	Indica hybrid	Anhui	2004	9.1725	143	120	NA	NA	80	26.5	NA	NA	NA
jin you 2155	Indica hybrid	Guangxi	2004	8.3385	117	121.5	NA	2.58	85.4	28.1	147.4	3	125.8796
yue you 938	Indica hybrid	Jiangxi	2004	8.04945	129.9	114.2	NA	2.7	74.9	26.5	161.8	3.4	121.2
efu feng you 11	Indica hybrid	Jiangxi	2004	7.11945	127.5	118	NA	2.55	NA	25.5	154.2	3.2	110.1
xian nong 22 hao	Indica hybrid	Jiangxi	2004	7.7433	117.3	108.6	NA	2.64	81.1	27	132.7	3.3	107.6
fo shan you zhan	Indica inbred	Guangdong	2004	6.51015	114	96.4	20	3.285	80.95	19.6	130	NA	105.235
ye huang zhan	Indica inbred	Guangdong	2004	6.81855	121	98.1	19.7	3.285	85.45	20.2	120.3	NA	102.79635
feng si zhan	Indica inbred	Guangdong	2004	6.78045	125.5	101.2	20	3.4875	78.8	21.4	113.7	NA	89.5956
fu you 4 hao	Indica hybrid	Sichuan	2004	8.4864	155	115	24.2	2.6895	85.8	26.5	NA	2.1	NA
jin you 966	Indica hybrid	Guangxi	2004	7.5315	120	112.4	24.7	2.7	79.3	29.9	127.7	3.3	101.2661
¢òyou 1259	Indica hybrid	Fujian	2004	9.099	147	120	26	NA	90	29	165	2.2	148.5
zhong you 936	Indica hybrid	Sichuan	2004	7.7616	150	111	25.7	2.25	73.6	27.6	NA	3	NA
mian 5you 527	Indica hybrid	Chongqing	2004	7.50795	165	115	NA	2.4	80	28.85	NA	3.2	NA
wu you 308	Indica hybrid	Guangdong	2004	8.42625	120	92.87	21.28	NA	89.845	23.97	NA	NA	NA
Dqi bao you 527	Indica hybrid	Fujian	2004	7.03125	129	110	23	NA	85	29	135	3	114.75
yi xiang 3003	Indica hybrid	Chongqing	2004	7.0275	167	113	26	2.4	83.5	NA	NA	3.2	127.1
guo dao 1 hao	Indica hybrid	Ministry of Agriculture and Rural Affairs of the People¡®s Republic of China	2004	6.6978	120.6	107.8	25.6	2.67	73.5	27.9	142	3.4	104.37
yue you 9113	Indica hybrid	Ministry of Agriculture and Rural Affairs of the People¡®s Republic of China	2004	6.5757	113.5	92.7	22.7	3.39	80.3	25.5	107.8	3.4	86.5634
feng you xiang zhan	Indica hybrid	Shaanxi	2004	8.586	158	126.5	24.24	2.6865	73.39	27.39	192.8	3.1	141.67
yang liang you 6 hao	Indica hybrid	Henan	2004	9.576	145	113	25	NA	85	28.5	NA	3.1	NA
hong lian you 6 hao	Indica hybrid	Guangxi	2004	7.5315	129.5	120.5	21.9	2.595	78.2	27.4	143.4	3	112.1388
jin gu 202	Indica hybrid	Chongqing	2004	7.257	155	111	NA	NA	87.3	NA	NA	3	NA
zhong 9you 838xuan	Indica hybrid	Guizhou	2004	9.315	156.5	99	22.8	NA	78.8	27.49	105	NA	82.74
T78you 2155	Indica hybrid	Guangdong	2004	7.6332	122	116.6	31.7	NA	86.74	25.63	NA	NA	NA
yi xiang 2308	Indica hybrid	Jiangsu	2004	9.699	148	120	NA	2.55	80	28	NA	3.4	130
gu you 527	Indica hybrid	Fujian	2004	6.7101	130	100	23	NA	85	28	NA	2.8	NA
chuan xiang 8 hao	Indica hybrid	Sichuan	2004	8.0625	154	116	25	2.49	77.2	28	NA	2.7	NA
¢òyou 416	Indica hybrid	Hunan	2004	8.4165	140	110	NA	2.25	87	28	162.5	2.3	141.375
yue you 9113	Indica hybrid	Hunan	2004	8.00175	113	92.5	NA	3.45	80	26.5	110	3.4	88
feng you xiang zhan	Indica hybrid	Yunnan	2004	10.08	163.5	105	21.7	NA	84	29.4	NA	3.5	NA
yi xiang 725	Indica hybrid	Sichuan	2004	8.0334	151.5	117	26.39	2.3715	78.67	30.24	NA	3	NA
yi xiang 2308	Indica hybrid	Sichuan	2004	7.58925	152	121.5	27	2.439	79.94	29.16	NA	3.2	NA
yi xiang 2292	Indica hybrid	Jiangxi	2004	7.5894	126.1	123.4	NA	2.625	77.6	29.9	128.9	3.4	100
yue you 9113	Indica hybrid	Hubei	2004	7.7334	117.2	90.1	22.9	3.885	78.2	26.01	105	3.6	82.1
feng you xiang zhan	Indica hybrid	Hubei	2004	8.2218	137.3	120.4	23.3	2.535	82.2	27.41	166.9	3.2	137.2
wan dao 87	Indica hybrid	Henan	2004	10.0005	135	126	NA	NA	85	29	190	2.9	161.5
jin you 117	Indica hybrid	Jiangxi	2004	7.7037	122.8	118.9	NA	2.475	75.3	29.1	148.8	3.6	112.1
yi xiang 99E-4	Indica hybrid	Sichuan	2004	8.0427	152	120	26.7	2.4975	75.7	29.4	NA	3	118.4
Dyou 202	Indica hybrid	Sichuan	2004	8.2188	153	115	25.3	2.682	81.9	29.9	NA	3	NA
yi xiang 2292	Indica hybrid	Ministry of Agriculture and Rural Affairs of the People¡®s Republic of China	2004	8.56335	136.3	120.7	26.1	2.64	76.2	29.9	138.2	3.2	105.3084
wan dao 87	Indica hybrid	Hubei	2004	8.4315	133	112.9	23	2.7	81.7	27.9	152.4	3.1	124.5
jin you 117	Indica hybrid	Guizhou	2004	9.132	156.5	105	27	2.85	79.4	31	NA	NA	NA
jin you 117	Indica hybrid	Shaanxi	2004	11.004	154	120	26.74	NA	79	29	NA	NA	NA
jin dao 9901	Japonica inbred	Tianjin	2004	8.2995	145	100	18	NA	90	25	NA	1.9	NA
jin dao 291	Japonica inbred	Tianjin	2004	8.9265	145	NA	23.3	NA	88	22.2	NA	NA	NA
jin yuan 27	Japonica inbred	Tianjin	2004	8.52	175	110	20.2	NA	90	24	NA	NA	NA
hua yu 446	Japonica inbred	Tianjin	2004	7.798875	167.5	110	21	3.75	95	25.5	NA	1.6	NA
yu quan 39	Japonica inbred	Tianjin	2004	7.2837	170	105	22	NA	NA	25	NA	NA	140
jing dao 25	Japonica inbred	Tianjin	2004	8.4705	157.5	107.5	20.5	NA	87.5	26.5	NA	2.15	NA
zhen hui 084	Indica inbred	Jiangsu	2004	9.1575	141	115	NA	2.55	93	28.5	NA	3.1	120
yang fu xian6 hao	Indica inbred	Jiangsu	2004	9.2715	142	120	NA	2.1	92	30	NA	3	155
huai dao 8 hao	Japonica inbred	Jiangsu	2004	8.964	155	100	NA	3.3	92	27	NA	NA	105
huai dao 7 hao	Japonica inbred	Jiangsu	2004	9.7725	150	95	NA	3.3	90	27	NA	NA	110
yang fu jing 7 hao	Japonica inbred	Jiangsu	2004	9.52905	156	105	NA	3.6	90	27	NA	NA	106
hua jing 3 hao	Japonica inbred	Jiangsu	2004	9.255	155	95	NA	3.45	90	24	NA	NA	115
chang nong jing 4 hao	Japonica inbred	Jiangsu	2004	10.191	156	103	NA	3	92	27	NA	NA	130
gan zao xian56 hao	Indica inbred	Jiangxi	2004	6.23055	116.9	93.1	NA	3.51	68.1	19.3	130.4	3.3	88.8
gan zao xian57 hao	Indica inbred	Jiangxi	2004	6.7149	111	93.2	NA	3.15	83.5	23.7	118.9	2.3	99.3
gan zao xian58 hao	Indica inbred	Jiangxi	2004	6.6918	111.8	86.8	NA	3.195	73.6	25.1	122.4	2.4	90.1
gan wan xian35 hao	Indica inbred	Jiangxi	2004	5.0694	120.3	109.1	NA	3.03	65.7	22.2	134.9	3.5	88.6
gan wan xian36 hao	Indica inbred	Jiangxi	2004	7.1985	131.3	101.6	NA	2.505	75	24.7	143.8	3.4	107.9
quan zhen 10 hao	Indica inbred	Fujian	2004	6.53175	118	100	22	NA	82	26.5	115	2.5	94.3
dong nan 201	Indica inbred	Fujian	2004	7.5	145	105	23.5	NA	90	25	NA	2.8	NA
ken yu 28 hao	Japonica inbred	Hebei	2004	9.0105	172	110	16.9	NA	NA	24.5	NA	NA	NA
chang A12	Japonica inbred	Hebei	2004	9.141	163	98	18	NA	95	25	NA	NA	NA
3you 18	Japonica hybrid	Henan	2004	7.7835	150	115	21.3	NA	80	26.3	NA	1.8	180
yu za 34	Japonica hybrid	Yunnan	2004	10.419	175	100	20.3	NA	NA	24	NA	1.8	140
dian za 33	Japonica hybrid	Yunnan	2004	10.338	172.5	107.5	22	NA	84	23.7	NA	1.7	145
yun jing you 1 hao	Japonica inbred	Yunnan	2004	7.97445	180	92.6	19.2	NA	NA	25.5	NA	2.6	72
yun c hao 7 hao	Indica inbred	Yunnan	2004	8.05125	155	110	23.4	NA	NA	27.5	NA	NA	147
hong cheng 20	Indica inbred	Yunnan	2004	9.5445	154	92.5	18	NA	85	26	NA	2.7	125
feng dao 16 hao	Japonica inbred	Yunnan	2004	8.8551	180	90	17.5	NA	NA	25.5	NA	NA	NA
lin xian21	Indica inbred	Yunnan	2004	8.3325	165	105	25	NA	87.5	29.5	NA	NA	NA
yu xiang zhan	Indica inbred	Guangxi	2004	7.236	122.5	103	22	2.955	76.9	22.7	135.2	3.1	103.9688
gui xiang 2 hao	Indica inbred	Guangxi	2004	6.8505	122	110.5	23.1	2.73	79.6	26	116.2	3.3	92.4952
bo xiang zhan 3 hao	Indica inbred	Guangxi	2004	5.766	124	111.7	23	3.375	77.1	19.7	116.4	3	89.7444
hu hai 537	Indica inbred	Hainan	2004	7.26735	132.7	106.9	21.2	3.2565	85.45	25.7	99.9	NA	85.36455
mu dan jiang 26 hao	Japonica inbred	Heilongjiang	2004	8.3023	NA	90	17.5	NA	NA	25.1	NA	1.9	NA
long dao 3 hao	Japonica inbred	Heilongjiang	2004	7.4767	NA	95	18	NA	NA	26.5	NA	1.95	NA
sui jing 7 hao	Japonica inbred	Heilongjiang	2004	7.451	NA	96	17.5	NA	NA	26.9	NA	2	NA
long dong 104	Japonica inbred	Heilongjiang	2004	7.9509	NA	90.5	16.8	NA	85.75	26.6	NA	1.55	NA
zheng hua fu 9 hao	Japonica inbred	Henan	2004	7.4235	157	107.5	21	3.75	90.2	25.1	NA	1.6	108.9
ma ba yin zhan	Indica inbred	Guangdong	2004	4.7385	108	NA	NA	NA	NA	NA	NA	NA	NA
99zao 677	Indica inbred	Hunan	2004	7.395	111.5	85	NA	3	85	25.5	115	2.2	97.75
dong zhong 5 hao	Indica inbred	Hubei	2004	6.28365	147.9	117.9	24.5	2.805	74.7	23.99	140.9	3.6	105.3
song liao 5 hao	Japonica inbred	Jilin	2004	8.3948	138	98	20	NA	NA	30	NA	NA	NA
ai hua 5 hao	Indica inbred	Hunan	2004	6.86085	109.5	95.8	24.4	NA	85.1	27.2	98	NA	83.398
dong jing za 3 hao	Japonica hybrid	Hubei	2004	7.37745	126.9	88.4	17	2.955	84.5	27.29	115.1	1.8	97.4
yun 9707	Japonica inbred	Anhui	2004	8.226	125	80	NA	NA	85	30	85	NA	72.25
tong yu 223	Japonica inbred	Jilin	2004	8.631	142	101.3	25	NA	95	26	NA	NA	NA
dao guang 1 hao	Japonica inbred	Jilin	2004	7.618	137	110	21	NA	90	27	NA	NA	NA
wan dao 76	Japonica hybrid	Anhui	2004	8.95215	148	120	NA	NA	83	26	160	NA	132.8
wan dao 78	Japonica hybrid	Anhui	2004	9.867	140	113	NA	NA	80	26	NA	NA	NA
wan dao 80	Japonica hybrid	Anhui	2004	8.406	135	102.5	23	NA	80	25	120	NA	96
wan dao 117	Indica inbred	Anhui	2004	7.9425	NA	NA	NA	NA	85	26	NA	NA	NA
shen you 254	Japonica hybrid	Shanghai	2004	9.549	152.5	85	NA	NA	80	27	NA	NA	NA
ji jing 95 hao	Japonica inbred	Jilin	2004	8.7506	145	105	18	NA	95	24	NA	NA	NA
jiu dao 48 hao	Japonica inbred	Jilin	2004	8.496	143	109	18	NA	90	25.8	NA	NA	NA
chang xuan 14 hao	Japonica inbred	Jilin	2004	8.2725	140	105	19	NA	90	24.5	NA	NA	NA
tong yu 105	Japonica inbred	Jilin	2004	8.6025	145	99.8	23	NA	95	26	NA	NA	NA
jiu dao 46 hao	Japonica inbred	Jilin	2004	8.22	140	107	20.2	NA	90	25	NA	NA	NA
jiu dao 45 hao	Japonica inbred	Jilin	2004	7.4355	138	104	19.2	NA	90	26	NA	NA	NA
ji nong da 19 hao	Japonica inbred	Jilin	2004	8.175	132	98	23.5	NA	90	26	NA	NA	NA
jiu dao 47 hao	Japonica inbred	Jilin	2004	8.4	139	103	19.8	NA	90	25	NA	NA	NA
jiu dao 44 hao	Japonica inbred	Jilin	2004	7.8765	130	100	17.8	NA	90	28	NA	NA	NA
jiu dao 43 hao	Japonica inbred	Jilin	2004	7.7635	143	100	16.7	NA	90	24.5	NA	NA	NA
yan jing 26 hao	Japonica inbred	Jilin	2004	7.98	131	93.6	17.1	NA	80.6	26	NA	NA	NA
bi jing 42 hao	Japonica inbred	Guizhou	2004	5.5635	175	95	NA	2.775	85	27	NA	1.7	NA
xiujing 11 hao	Japonica inbred	Yunnan	2004	9.5625	171	100	18	NA	NA	23.5	NA	NA	94.5
chang jing 8 hao	Japonica inbred	Yunnan	2004	7.665	173	97.5	18.5	NA	88.5	25.5	NA	NA	NA
xing jing 4 hao	Japonica inbred	Neimeng	2004	7.7565	NA	NA	NA	NA	NA	NA	NA	NA	NA
gu yu xiang dao 1 hao	Japonica inbred	Neimeng	2004	8.8485	NA	105	20	NA	90	25	NA	2	NA
xiang zao 143	Indica inbred	Hunan	2004	3.2775	108	75	NA	3.45	81.1	26.95	100	3.6	81.1
xiang zao 143	Indica inbred	Ministry of Agriculture and Rural Affairs of the People¡®s Republic of China	2005	6.65535	107.4	75.6	17.9	3.81	81	26.4	87.2	3.3	70.632
feng hua zhan	Indica inbred	Jiangxi	2005	7.10115	121.9	92.2	NA	3.45	80.5	21.6	111.6	3.2	89.8
jin yuan 85	Japonica inbred	Ministry of Agriculture and Rural Affairs of the People¡®s Republic of China	2005	10.242	157.2	89.7	19.8	NA	93.6	26.2	97.2	NA	90.9792
ji jing 105	Japonica inbred	Ministry of Agriculture and Rural Affairs of the People¡®s Republic of China	2005	9.309	152.7	96.5	16.8	NA	89.6	24	118.3	NA	105.9968
xiu shui 09	Japonica inbred	Shanghai	2005	8.9895	159	95	NA	3.3	93	26.75	NA	NA	NA
yongyou 6 hao	Japonica hybrid	Zhejiang	2005	8.751	156.4	NA	NA	2.01	72.9	24.7	NA	2.3	210.1
long jing 14 hao	Japonica inbred	Heilongjiang	2005	8.0745	NA	86.5	18.8	NA	NA	26.4	NA	1.8	NA
shang yu 397	Japonica inbred	Heilongjiang	2005	7.631	NA	85	16	NA	NA	26	NA	1.75	NA
gui nong zhan	Indica inbred	Guangdong	2005	6.36105	114.5	92.75	19.75	3.135	82.85	22.3	121	NA	100.2485
feng mei zhan	Indica inbred	Hainan	2005	8.01675	146.5	92.7	20.3	3.279	88.9	21.5	125.2	3	111.3028
yu xiang you zhan	Indica inbred	Guangdong	2005	6.9492	127	106	21.05	3.045	83.8	22.6	132	NA	110.616
yin hua zhan 2 hao	Indica inbred	Guangdong	2005	6.4197	131.5	102.35	20.2	3.3825	81.35	19.4	122.9	NA	99.97915
yang guang 200	Japonica inbred	Shandong	2005	8.634	154	95	16	3.48	NA	27.3	NA	1.7	92.2
chang you 2 hao	Japonica hybrid	Jiangsu	2005	9.3915	164	110	NA	2.55	91	26	NA	NA	160
[truncated: 5,688 more rows]
